# Supplementary material for: Colonization of Vitis vinifera L. by the Endophyte Trichoderma sp. Strain T154: Biocontrol Activity Against Phaeoacremonium minimum
Source: PubMed Central journal article supplement (PMC7417607; doi:10.3389/fpls.2020.01170), 2020-08-04
Supplement: DataSheet_3.pdf [file DataSheet_3.pdf]

**Niches of colonization of *Vitis vinifera* L. by an endophyte *Trichoderma* sp. T154 strain and its biocontrol activity against *Phaeoacremonium minimum*.**

**G. Carro-Huerga<sup>1</sup>, S. Compant<sup>2</sup>, M. Gorfer<sup>2</sup>, R.E. Cardoza Silva<sup>1,3</sup>, M. Schmoll<sup>2</sup>, S. Gutiérrez<sup>1,3</sup>, P.A. Casquero<sup>1\*</sup>**

<sup>1</sup> Research Group of Engineering and Sustainable Agriculture, Natural Resources Institute, Universidad de León, 24071 Portugal Avenue 41, León, Spain.

<sup>2</sup> AIT Austrian Institute of Technology GmbH, Center for Health & Environment, Bioresources Unit, 3430 Tulln, Austria.

<sup>3</sup> Area of Microbiology, University School of Agricultural Engineers, Universidad de León, Ponferrada Campus, 24401 Astorga Avenue s/n, Ponferrada, Spain.

\* **Correspondence:** Pedro Antonio Casquero: [pacas1@unileon.es](mailto:pacas1@unileon.es)

---

Data S3

This file contains:

Appendix S1-S6

### Supplementary Data S3. Sequences retrieved from the genomes analyzed in this work.

#### Appendix S1. *act1* cds retrieved from the genomes of the 13 species analyzed in the present work

>Trichoderma arundinaceum

```
ATGGCTCAGCAACCTTTGCCACGTCTGGCTCAGCCAACCGACATCTACGGCGGAGATGAGGTCTCCG
CCCTCGTTCTAGATCCCGGCTACTGCAATACGCGAGCAGGTTTCGCCGGCGAGGATGTCCCAAATC
AATCCTGCCGTCGTTCTACGGCCACATCACCAGCGACCCCTCGAGATCTGTTTGGCGATGAGTGC
ATCATCCCGCGCGGCGACTTCGAGGTCGCAATTACATGAACAAGGATAGCGTCGTGGAGGATTGG
GATGTGGCAGCTAAGATGTGGGAATTCATGCTGGTTAAGCGCCTGCAGCCCGAGCGACAGACACCT
CCTTCCAAGAACGGGTTGAACGATGACGTGAAAGAGCAGGATGGCGAGGGGAGACGTGCGGATGGA
AGAAATTGAGGCACAGGAGAAACCTCTAGAGGAATCCCTTTGCTGATGACAGAAGCTCCCTGGAA
CTCGCCAAAGGCGCGTGAAAAGGCCATCGAGCTAAGCATGGAGAGCTGGGGAACCCCGCCTTCTG
GTTGAGTCGGACGCCGTTCTATCTGCTTTCGCTGCTGGCAAGGCTACCGCCCTTGTCATCGATGTTG
GTGGTGCAAACACCTCCGTTACAGCTATCCACGACGGCATGGTTCTCAAGAGATCTATCCAGCGATC
GCCCCGCGGTGGTCTATGGCTGTCTCGAAATCCGCAACATGTGGGAAACCTCCGACCCAAAGTT
GACCTGATCCCGACGTTTATGGTCGAGAACAAGACTCCTGTGGATGCCCTTGCTCCCGCTCAAGCGC
GACTACGCGAGTTCCATTCAAGATCCATGACTCTTTCGAGCTTTTGAAGAAGAGCGGTTGTTGAC
TGAGTATAAAGAGTCCGTTGTTGAGGTTTGGCGTGGCCCTGGAAGATACGGTGCTGCCGAAACGA
GGAGTACATTAATCACAGCCTGGCCGTGTATTGAGATGCCAGATGGCTACAACAGATGTGGCG
TGAGCAGCGATTCAAGGTGGCTGAGGGAATGTGGGATGAGAATGCTGGATAACCTGTTCCCGAGTC
GGAGCGTCTACCAAGGCTCAGACCATTCCTGAGCTTATCCGCTCTGCTCTCAATGCTATTGATGTTG
ATCTTCGGGGCAACCTTCTCGCCAACGTTGTCGTCACTGGTAGCACAAGTTTGATCAACGGCTTCAAC
GACCGACTGAACAACGAGCTGACAGCGATGTATCCCGGATTGAAGATCAAGATTCACGCGGCGGGC
TTGTCGAGCGAGCGTAGATTCCGGTCTGGATCGGTGGCAGCATTCTGGCCAGTCTTGGCACTTTCC
ATCAAATGTGGATATCCAAGAAGGAGTATGAGGAGAACGGAGCCGGTATCGTTGAGAAGCGATGC
AAATAG
```

>Trichoderma asperellum

```
ATGGCCCAGCAGCCTTTGCCACGTCTGGCTCAGCCAACCGACATCTACGGTGGAGATGAGGTCTCTG
CACTCGTTCTTGATCCCGGCTACTGCAACACGCGAGCAGGCTTCGCTGGCGAAGATGTCCCAAAGTC
AATCCTGCCATCGTTCTACGGCCATGTCACCAGCGACCCCTCCCGAGATCTATTCGGCGATGAATGC
ATCATCCACGCGAGCGACTTCGAGGTCGCAACTACATGAATAAGGACAGCGTTGTAGAGGACTGG
GATGTGGCAGCCAAGATGTGGGAATTCATGCTGGTTAAGCGCCTGCAGCCCGAGCGACAGACACCG
CCATCGAAGAATAAGCTGAACGACGACGTGAAGGAGCAGGACGGCGAAGGAGATGTGCGGATGG
AAGAAGTCGAGGCGATGGAGAAGGCTCTAGAGGAGTATCCTTTGTTGATGACAGAAGCTCCGTGG
AACTCGCCAAAGGCACGTGAAAAGGCCATCGAGCTCAGCATGGAGAGCTGGGGAACCCCGCCTTCT
TGGCTAAGCCGACTCCCGTTCTGTCGTCATTGCTGCTGGAAGGCCACTGCTCTTGTCATCGACGT
TGCGCGGCCAATACCTCCGTTACAGCTATCCATGATGGCATGGTTTTGAAGAGATCTATCCAGCGA
TCACCCGCGGTGGTTTATGGCTGTCTTCGAGATCCGCAACATGTGGGAAACTTCCGAGCCGAAA
GTTGACTTGATTCCGACATTCATGGTCGAGAACAAGACTCCTGTGGATGCTCTCGCCCTGCCAAG
CGGACTACGCGAATTTCCCTACAAGATCCACGACTCTTATCGAGCATTGAAGAAGAGCGGCTCTT
GACCGAGTTCAAGGAGTCTGTCGTTGAGGTTTGGCGTGGGCCTGGAAGATACGGTGCCCGCGGAA
ACGAGGAGTACATCAAATCTCAGCCTGGCCGTGTGTTTGAAGATGCCTGATGGCTACAACAGATGT
GGCGCGAGCAGCGATTCAAGGTAGCTGAGGGCATGTGGGACGAAAACGCTGGATAACCCCGTCCCG
GAGTCGGAGCGCCTACCAAGGCCAGACCATCCCGAGCTTATTCGCTCCGCCCTCAACGCTATTG
ACGTTGACCTTCGAGGCAACCTTCTCGCCAACGTTGTTGTTACGGGCAGCACAAAGTTTGATCAATGG
```

CTTCAACGACCGTCTAAATAACGAGTTGACGGCGATGTATCCCGGGCTGAAGATCAAGATCCACGCT  
GCAGGTCTGTCAAGCGAGCGTAGATTCGGTGCCTGGATTGGTGAAGCATTCTTGCTAGCTTGGGA  
ACTTTCCACCAAATGTGGATATCCAAAAGGAGTATGAAGAAAACGGAGTTGGCATTGTGCGAGAAG  
CGATGCAAATAG

>Trichoderma atrobrunneum

ATGGCCCAGCAGCCTTTGCCACGTCGGCGCAGCCAACCGACATTTACGGCGGAGATGAGGTCTCT  
GCCCTCGTTCTCGACTCCGGCTACTGCAACACGCGAGCAGGTTTTGCCGGCGAAGATGTCCCAAAT  
CAATCCTGCCGTCTTCTACGGTCACATCACCAGCGATCCCCGCGAGACCTGTTTGGCGATGAGTG  
CATCATCCCGCGCGGGCGACTTCGAGGTCCGCAACTACATGAACAAGGACAGCGTCGTGGAGGACTG  
GGATGTGCGCCGAAGATGTGGGAGTTTATGCTGGTTAAGCGCCTGCAGCCGAGAGACAGACACC  
TCCGTCCAAGAATGGATTGAACGACGACGTGAAAGACCAGGACGGCGAGGGCGATGTCGCGATGG  
AAGAGATCGAGGGTCAGGAAAAGCCTCTGGAGGAGTTCCATTGCTGATGACAGAAGCTCCCTGGA  
ACTCACCCAAGGCACGTGAAAAGGCCATTGAGCTTAGCATGGAGAGCTGGGGGACGCCGGCCTTTT  
GGTTGAGCCGACACCTGTTCTGTCTGCCTTGTCTGGCAAAGCGACTGCTCTTGTATCGATATC  
GGCGGCGCAAACACCTCCGTACAGCTATCCACGACGGCATGGTTCTCAAGAGATCTATCCAGCGAT  
CACCCGACAGGTGGCCTATGGCTGTCTTCGCAGATCCGCAACATGTGGGAAACCTCTGAGCCCAAGG  
TCGACCTGATCCCAACATTCATGGTTGAGAACAAGACTCCTGTGGATGCCCTCGCTCCAGCTCAGGC  
ACGGCTACGCGAATTCACATAAAGATTCACGACTCTTCCGAGCATTGGAAGAGGAGCGGCTGCTG  
ACCGAATTCAAAGAGTCCGTGCTCGAGGTTTGGCGTGGTCCCGGACGGTACGGTGCCGCTGGGAAC  
GAGGAGTACATCAAGTCACAGCCTGGCCGTGATTTGAGATGCCCGATGGCTACAACCAGATGTGG  
CGCGAGCAGCGATTCAAGGTGGCCGAGGGAATGTGGGATGAGAACGCCGGATACCCCGTTCCCGA  
GGCGGAGCGTCTACCAAGGCTCAGACCATCCCTGAGCTTATCCGCTCTGCTCTCAACGCCATTGAT  
GTTGATCTTCGGGGCAACCTTCTCGCCAATGTTGTCTGTTACCGGTAGCACAAGCTTGATCAACGGCTT  
CAACGACCGACTCAACAACGAGCTGACAGCCATGTATCCCGGATTGAAGATCAAGATCCACGCGGC  
CGGCTTGTGAGCGAGCGTAGATTCGGTGCCTGGATCGGCGGCAGCATTCTGGCCAGTCTGGGTAC  
TTTCCACCAAATGTGGATATCCAAGAAGGAGTATGAGGAAAACGGACCGGGCATTGTTGAGAAGCG  
ATGCAAATAG

>Trichoderma atroviride

ATGGCCCAGCAGCCCTTGCCCACGTCGGCTCAGCCAACCGACATCTACGGCGGAGATGAGGTCTCT  
GCCCTCGTTCTTGACCCCGGCTACTGCAATACGCGAGCAGGCTTCGCTGGCGAAGATGTCCCAAAGT  
CAATCTGCCGTACTTCTACGGCCATGTCACCAGCGACCTCCCCGAGATCTATTTGGCGATGAGTGC  
ATCATCCCACGAAGCGACTTTGAGGTCCGCAACTACATGAACAAGGACAGCGTCGTAGAGGACTGG  
GATGTGGCGGCCAAGATGTGGGAATTCATGCTGGTTAAGCGCCTACAGCCCGAGCGACAGACGCC  
GCCATCGAAGAACAAGCTGAACGACGACGTGAAGGAGCAAGACGGCGAGGGAGATGTCGCGATG  
GAAGAAGTAGAGACGATGGAGAAGGCCCTAGAAGAGTTCCCTTTGCTGATGACAGAAGCTCCGTG  
GAACTCGCCCAAGGCGCGTGAAAAGGCCATCGAGCTCAGCATGGAGAGCTGGGGAACTCCAGCCTT  
CTGGCTAAGCCGACTCCCGTTCTGTCTGTCATTCCCGCTGGAAAGGCCACTGCCCTTGTATCGAC  
GTTGGTGGCGCCAACACCTCCGTGACAGCTATCCATGATGGCATGGTTTTGAAGCGATCTATCCAGC  
GATCACCCGCGGGCGGTCTATGGCTGTCTTCGCAGATTCGCAACATGTGGGAGACTTCCGAGCCAA  
AAGTTGACTTGGTTCCGACGTTTATGGTTGAGAACAAGTCTCCCGTGGATGCTCTTGCTCCTGCCAA  
GCGCGACTACGCGAGTTCCTTACAAGATCCACGACTCTTCCGAGCATTGGAAGAAGAGCGGCTGT  
TGACCGAGTTCAAGGAGTCTGTTGTTGAGGTCTGGCGTGGACCTGGAAGATACGGCGCCGCCGGAA  
ACGAAGAGTACATCAAATCTCAGCCGGGTCGTGTGTTGAGATGCCTGATGGCTACAACCAGATGT  
GGCGCGAGCAGCGATTCAAGGTCGCTGAGGGCATGTGGGACGAAAACGCTGGATACCCCGTCCCT  
GAGTCGGAGCGCCTACCAAGGCCAGACCATCCCTGAGCTTATTGTTCCGCACTCAATGCCATTG  
ACGTTGACCTGCGGGGCAACCTCCTCGCCAACGTCGTTGTTACGGGTAGCACAAGTTTGATCAACGG  
CTTCAACGATCGTCTAAATAACGAGCTGACAGCGATGTATCCCGGGCTGAAGATCAAGATTCACGCT

GCAGGCCTGTCGAGCGAGCGCAGATTCGGTGCCTGGATTGGTGGAAAGTATTCTTGCTAGCTTGGGA  
ACTTTCCACCAAATGTGGATATCCAAAAGGAGTATGAAGAAAACGGAGTTGGCATTGTCGAGAAG  
CGATGCAAATAG

>Trichoderma sp. T154

ATGGCCCAGCAGCCTTTGCCACGTGCGGCGCAGCCAACCGACATTTATGGCGGAGATGAGGTCTCT  
GCCCTCGTTCTCGACCCCGGCTACTGCAACACGCGAGCAGGCTTTGCTGGCGAAGATGTCCCAAAT  
CAATCCTGCCGTCTTCTACGGCCACATCACCAGCGATCCCCGCGAGACCTGTTTGGCGATGAGTG  
CATCATCCCGCGCGGCGACTTCGAGGTCCGGAACACATGAACAAGGACAGCGTCGTGGAGGATTG  
GGATGTCGCCGCAAGATGTGGGAGTTTATGCTGGTTAAGCGCCTGCAGCCTGAGAGACAGACTCC  
TCCGTCCAAAATGGATTGAACGACGATGTGAAAGACCAGGATGGCGAGGGCGATGTCGCGATGG  
AGGAAATCGAGGGTCAGGAAAAGCCTCTGGAGGAGTTTCCATTGCTGATGACAGAAGCTCCGTGGA  
ACTCGCCAAAGCGCGTGAAAAGGCCATTGAGCTCAGCATGGAGAGCTGGGGAACCCCGGCCTTTT  
GGTTGAGCCGGACACCTGTTCTGTCCGCCTTTGCTGCTGGCAAAGCGACTGCTCTTGTTCATCGATATC  
GGCGGCGCAAACACCTCCGTACAGCTATCCACGATGGCATGGTTCTCAAGAGATCTATCCAGCGAT  
CACCTGCAGGTGGCCTGTGGCTGTCTTCGCAGATCCGCAACATGTGGGAGACTTCGAGCCCAAGG  
TCGACTTGATCCCGACATTCATGGTTGAGAACAAGACTCCTGTGGATGCCCTCGCCCCGCTCAGGC  
ACGACTACGCGAATTCATTCAAGATTCATGACTCCTTCGAGCATTGGAAGAGGAGCGGCTGCTG  
ACCGAGTTCAAAGAGTCTGTTGTGCGAGGTTTGGCGTGGTCCCGGACGGTATGGCGCCGCTGGAAAC  
GAGGAATACATCAAGTCGCAGCCCGGCCGCGTATTTGAGATGCCCGATGGCTACAACCAGATGTGG  
CGCGAGCAGCGATTCAAGGTGGCCGAGGGAATGTGGGACGAGAATGCCGGATACCCCGTTCCCGA  
GGCGGAGCGTCTACCAAGGCTCAGACCATTCTGAGCTTATCCGCTCTGCTCTCAACGCCATTGAT  
GTCGATCTTCGGGGTAACCTTCTCGCCAATGTTGTGCTTACCGGCAGCACAAGCTTGATCAACGGCT  
TCAACGACCGACTCAACAACGAGCTGACAGCCATGTATCCCGACTGAAGATCAAGATTCACGCGG  
CCGCTTGTGCGAGCGAGCGTAGATTTGGTGCCTGGATCGGTGGCAGCATCTGGCCAGTCTGGGCA  
CTTTCCATCAAATGTGGATATCCAAGAAGGAGTACGAAGAAAACGGACCCGGGCATTGTTGAGAAGC  
GATGCAAATAG

>Trichoderma citrinoviride

ATGGCCCAGCAGCCTTTGCCACGTGCGGCGCAGCCAACCGACATTTACGGCGGAGATGAAGTCTCC  
GCCCTCGTTCTCGATCCCGGCTACTGCAACACGCGCGCGGGCTACGCCGCGAAGACGTCCCAAAT  
CCATCCTGCCGTCTTCTACGGCCACATCACCAGCGACCCTCCGCGAGACCTGTTTGGCGATGAGTG  
CATCATCCCGCGCGGCGACTTCGAGGTCCGCAACTACATGAACAAGGACAGCGTCGTGGAGGACTG  
GGACGTTGCGGCCAAGCTCTGGGAGTTTATGCTGGTTAAGCGCCTGCAGCCGAGCGACAGACGCA  
TCCGTCCAAAGATGGACTCAACGACGACATCAAGGAGCAGGATGGCGAGGGAGACGTGCGCCATGG  
AGGAGGTGGAGGGTCTGAAAAGCCCCTGGAGGAATCCCCTTGTGATGTCAGAAGCTCCCTGGA  
ACTCGCCAAAGGCGCGTGAAAAGGCCATTGAGCTGAGCATGGAGAGCTGGGGAACACCCGCTTCT  
GGTTGAGCCGGACGCCGTTCTGGCCTCTTTCGCGGCCGGCAAGGCCACTGCTCTCGTCATTGATGT  
CGGCGGCGCAAACACCTCCGTACAGCCATTACGACGGCATGGTTCTCAAGCGATCTATCCAGCGA  
TCACCCGCCGGCGGCTGTGGCTGTGTCGCGAGATCCGCAAGATGTGGGAGACGTCCGAGCCCAAG  
GTCGACCTGGTGCCGACGTTTCATGGTGGAGAACAAGACGCCTGTGGATGCCCTCGCCCCTCCACAA  
GCACGACTACGCGAATTTCCCTACAAGATCCACGACTCCTTCGGGGCCTTTGAAGAGGAGCGGGTGC  
TGACCGAGTTCAAAGAGTCCGTGCTGAGGTTTGGCGGGGCCCTGGACGATACGGCGCCGCTGGA  
AACGAGGAGTACATCAAGTCACAGCCCGGGCGCGTCTTCGAGATGCCCGACGGCTACAACCAGATG  
TGCGCGAGCAGCGGTTCAAGGTAGCAGAGGGCATGTGGGACGAAAACGCTGGTTACCCTCTTCCC  
GAGGAGGAGCGTCTCACAAGGCGCAGACCATTCTGAGCTGATCCGTTCTGCGCTCAACGCCGTC  
GACGTTGATCTTCGGGGCAACCTTTTGGGCAATGTCGTGCTCACCGGCAGCACGAGCTTGATCAACG  
GCTTCAACGACCGATTAACAACGAGCTGACGGCCATGTATCCCGGATTGAAGATCAAGATCCACGC  
CGCGGGCTTGTCAAGCGAGCGCAGATTCGGCGCCTGGATCGGCGGCAGCATCTTGGCCAGCCTGG

GTACCTTCCACCAGATGTGGATATCCAAGAAGGAGTACGAGGAAAACGGAGCTGGCATTGTGGAG  
AAGCGATGCAAATAG

>*Trichoderma gamsii*

ATGGCCCAGCAGCCTTTGCCACGTCGGCTCAGCCAACCGACATCTACGGCGGAGATGAGGTCTCT  
GCCCTCGTTCTTGACCCCGGCTACTGCAATACGCGAGCAGGCTTCGCTGGCGAAGATGTCCCAAGT  
CAATTCTACCATCGTTTCTACGGCCATGTCACCAGCGACCCTCCCCGAGATTTATTTGGCGACGAGTGC  
ATCATCCCACGAAGCGACTTTGAGGTCCGCAACTACATGAACAAGGACAGCGTCGTAGAGGACTGG  
GATGTGGCGGCTAAGATGTGGGAATTCATGCTGGTTAAGCGCCTACAGCCCAGCGACAGACGCCG  
CCATCAAAGAATAAGCTAAACGACGACGTGAAGGAGCAGGATGGCGAAGGAGATGTGCGGATGGA  
AGAAGTCGAGACGATGGAGAAGGCTCTAGAAGAGTTCCCTTGCTGATGACAGAAGCTCCGTGGAA  
CTCGCCCAAGGCACGTGAAAAGGCCATCGAGCTCAGCATGGAGAGCTGGGGGACTCCCGCCTTCTG  
GCTAAGCCGGACTCCCGTTCTGTCGTCATTGCGCGCTGAAAAGCTACTGCCCTTGCATTGACGTTG  
GTGGCGCCAATACCTCCGTTACAGCTATCCATGATGGCATGGTTTTGAAGCGATCTATCCAGCGATC  
ACCCGCGGGCGGTCTATGGCTGTCTTCGAGATCCGCAACATGTGGGAACTTCCGAGCCGAAAGT  
GGACTTGTTCCGACGTTTATGGTTGAGAACAAGTCTCCCGTGGATGCTCTTCTCCTGCCAGGCG  
CGACTACGCGAGTTCCTTACAAGATCCACGACTCTTTTCGAACATTTGAAGAAGAGCGGCTGTTGA  
CCGAGTTCAAGGAGTCCGTTGTTGAGTTTGGCGTGGACCTGGAAGATACGGCGCCGCTGGA AACG  
AAGAGTACATCAAATCTCAGCCTGGCCGTGTGTTGAGATGCCTGATGGCTACAACCAGATGTGGC  
GCGAGCAGCGATTCAAGGTCGCTGAGGGCATGTGGGACGAAAACGCCGGGTACCCCGTCCCGGAG  
TCGGAGCGCCTACCAAGGCCAGACCATCCCCGAACCTTATCCGTTCCGCCCTCAATGCTATTGACGT  
TGACCTGCGGGCAACCTCCTCGCCAACGTCGTTGTTACGGGAAGCACAAAGTTTGATCAACGGCTTC  
AACGACCGTCTAAATAACGAGCTGACAGCGATGTACCCTGGGCTGAAGATCAAGATTCACGCTGCA  
GGTCTGTCGAGCGAGCGCAGATTCGGTGCCTGGATTGGTGGAAAGCATTCTTGCTAGCTTGGGAACT  
TTCCACCAAATGTGGATATCCAAAAGGAGTATGAGGAAAACGGAGTTGGCATTGTCGAGAAGCGA  
TGCAAATAG

>*Trichoderma guizhouense*

ATGGCCCAGCAGCCTTTGCCACGTCGGCGCAGCCAACCGACATTTACGGCGGAGATGAGGTCTCT  
GCCCTCGTTCTCGACCCTGGTTACTGCAACACGCGAGCAGGTTTTGCCGGCGAAGATGTCCCAAT  
CAATCCTGCCGTCCTTCTACGGTCACATCACCAGCGATCCCCGCGAGACCTGTTTGGCGATGAGTG  
CATCATCCCGCGCGGCGACTTCGAGGTCCGCAACTACATGAACAAGGACAGCGTCGTGGAGGATTG  
GGATGTGCGCGCTAAGATGTGGGAGTTTATGCTGGTTAAGCGCCTGCAGCCGAGAGACAGACACC  
CCCGTCCAAGAACGGATTGAATGACGATGTGAAAGACCAGGACGGCGAGGGTGTATGTCGCCATGG  
AGGAAATCGAGGGTCAGGAAAAGCCTCTGGAGGAGTTCCATTGCTGATGACGGAAGCTCCCTGGA  
ACTCCCCAAGGCGCGTGAAAAGGCCATTGAGCTCAGCATGGAGAGCTGGGGGACCCCGCCTTTT  
GGTTGAGCCGACACCTGTTCTGTCTGCTTTTGTGCTGGCAAAGCGACTGCTCTTGTATCGATATC  
GGTGGCGCAAACACCTCCGTCACAGCTATCCACGACGGCATGGTTCTCAAGAGATCTATCCAGCGAT  
CACCCGAGGTGGCCTGTGGCTGTCCTCGCAGATCCGCAACATGTGGGAACTTCCGAGCCCAAGG  
TCGACTTGATCCCGACATTCATGGTTGAGAACAAGACTCCCGTGGATGCTCTTGCCCCCGCCAGGC  
ACGACTACGCGAATTCATACAAGATTCATGACTCCTTCCGAGCATTGAAGAGGAGCGACTGCTG  
ACCGAGTTCAAAGAGTCCGTCGTCGAGGTTTGGCGTGGTCCCGGACGGTATGGTGCCGAGGAAAC  
GAGGAGTACATCAAGTCACAGCCCGGCCGCGTATTTGAGATGCCCGATGGCTACAACCAGATGTGG  
CGCGAGCAGCGATTCAAGGTGGCCGAGGGAATGTGGGATGAGAACGCCGGATACCCCGTCCCGGA  
GGCAGAGCGTCTACCAAGGCTCAGACCATTCTGAGCTTATCCGCTCTGCTCTCAACGCCATCGAT  
GTTGATCTTCGGGGCAACCTTCTCGCCAATGTTGTGCTTACTGGCAGCACAAAGCTTGATCAACGGCT  
CAACGACCGACTCAACAACGAGCTGACAGCCATGTATCCCGGATTGAAGATCAAGATTCACGCGGC  
TGGCTTGTGAGCGAGCGTAGATTGCGCGCCTGGATTGGTGGCAGCATTCTGGCCAGTCTGGGTAC

TTTTACCAAATGTGGATATCTAAGAAGGAGTATGAGGAAAACGGACCGGGCATTGTTGAGAAGCG  
ATGCAAATAG

>*Trichoderma hamatum*

ATGGCCCAGCAGCCTTTGCCACGTCCGGCTCAGCCAACTGACATCTACGGTGGAGATGAGGTCTCTG  
CCCTCGTTCTTGACCCCGGCTACTGCAATACACGAGCAGGCTTCGCTGGCGAAGATGTCCCAAGTC  
GATCCTGCCCTCGTTCTACGGTCATGTACCAGCAACCCTCCCCGAGATCTATTTGGCGATGAGTGCA  
TCATCCCACGCAGCGACTTCGAGGTCCGCAACTACATGAACAAGGACAGCGTCGTAGAGGATTGGG  
ATGTGGCAGCCAAGATGTGGGAATTTATGCTGGTTAAGCGTCTGCAGCCCGAGCGACAGACACCGC  
CATCAAAGAATAAGCTGAACGACGACGTGAAGGAGCAGGACGGTGAAGGAGATGTGCGCATGGA  
GGAAGTCGAGACGATGGAGAAGGCTCTAGAAGAGTATCCTTTGCTGATGACGGAAGCTCCGTGGA  
ACTCGCCCAAGGCACGTGAAAAGGCCATCGAGCTCAGCATGGAGAGCTGGGGAACTCCCGCCTTCT  
GGCTGAGCCGGACTCCTGTTCTGTCATCATTGCGCGCTGGAAAGGCTACTGCCCTTGTATCGACGTT  
GGTGGCGCCAATACCTCCGTTACAGCTATCCATGATGGCATGGTTCTGAAGAGATCTATCCAGCGAT  
CACCCGCGGGCGGTCTATGGCTGTCTTCGAGATCCGCAACATGTGGGAAACTTCGAGCCAAAGG  
TTGACTTGATTCCGACGTTTATGGTTGAGAACAAGACTCCTGTGGATGCTCTCTCTCCCGCCCAAGCG  
CGACTACGCGAATTCCCCTACAAGATCCACGACTCTTATCGAGCATTTGAAGAAGAGCGGCTGTTGA  
CCGAATCAAGGAGTCTGTCGTTGAGTTTGGCGTGGACCTGGAAGATACGGCGCCCGCGGAAACG  
AAGAGTACATTAATCTCAACCCGGCCGTGTATTCGAGATGCCTGATGGCTACAACCAGATGTGGCG  
CGAGCAGCGATTCAAGGTAGCTGAGGGCATGTGGGACGAAAACGCTGGATAACCCCGTCCCGAGTC  
GGAGCGCCTACCAAGGCCAGACCATCCCCGAGCTTATTCGCTCCGCACTCAACGCTATTGACGTT  
GACCTTCGGGGCAATCTCCTCGCTAACGTTGTTGTTACGGGTAGCACAAGTTTGATCAACGGCTTCA  
ACGACCGTCTAAACAACGAGTTGACAGCGATGTATCCCGACTGAAGATCAAGATTCACGCTGCGG  
GTCTGTGAGCGAGCGCAGATTCCGGTGCCTGGATTGGTGGAAAGCATTCTCGCTAGCTTGGGAACTTT  
CCACCAAATGTGGATATCCAAAAGGAGTATGAGGAAAACGGAGTTGGCATTGTCGAGAAGCGAT  
GCAAATAG

>*Trichoderma harzianum*

ATGGCCCAGCAGCCTTTGCCACGTCCGGCGCAGCCAACCGACATTTACGGCGGAGATGAGGTCTCT  
GCCCTCGTTCTCGACCCCGGCTACTGTAACACGCGAGCAGGTTTTGCCGGCGAAGATGTTCCCAAT  
CAATCCTGCCGTCCTTCTACGGCCACATACCAGCGATCCCCGCGAGACCTGTTTGGCGATGAGTG  
CATCATCCC GCGCGGCGACTTCGAGGTCCGCAACTACATGAACAAGGACAGCGTTGTGGAGGATTG  
GGATGTGCGCGCCAAGATGTGGGAGTTTATGCTGGTTAAGCGCCTGCAGCCCGAGAGACAGACGCC  
TCCGTCCAAGAATGGATTGAATGACGACGTGAAAGACCAGGATGGCGAGGGCGATGTGCGCATGG  
AGGAGATCGAGGGTCAGGAAAAGCCTCTGGAGGAGTTTCCATTGCTGATGACAGAAGCTCCCTGGA  
ACTCGCCCAAGGCGCGTGAAAAGGCTATTGAGCTTAGCATGGAGAGCTGGGGGACCCCGCCTTTT  
GGTTGAGCCGGACACCTGTTCTATCTGCCTTCGCTGCTGGCAAAGCGACGGCTCTTGTATCGATAT  
CGGTGGCGCAAACACCTCCGTCACAGCTATCCACGACGGCATGGTTCTCAAGAGATCTATCCAGCGA  
TCACCTGCAGGTGGCCTGTGGCTGTCTTCGAGATCCGCAACATGTGGGAAACCTCTGAGCCCAAG  
GTCGACTTGATCCCAGACATTCATGGTTGAGAACAAGACTCCTGTCGATGCCCTCGCCCCCGCCAGG  
CACGACTACGCGAATTCCATACAAGATTCATGACTCCTTCGAGCATTGAAGAGGAGCGACTGCT  
CACCGAGTTCAAAGAGTCCGTCGTCGAGGTTTGGCGTGGCCCCGGACGGTATGGTGGCGCTGGGAA  
CGAGGAGTACATCAAGTCACAGCCTGGCCGCGTATTTGAGATGCCCGATGGCTACAACCAGATGTG  
GCGCGAGCAGCGATTCAAGGTGGCCGAGGGAATGTGGGATGAGAACGCCGGATAACCCGTTCCCG  
AGGCGGAGCGTCTACCAAGGCTCAGACTATCCCTGAGCTTATCCGCTCTGCTCTCAACGCCATTGA  
TGTTGATCTTCGGGGCAACCTTCTCGCTAATGTTGTCGTTACTGGTAGCACAAGCTTGATCAACGGCT  
TCAACGACCGACTCAACAATGAGCTGACAGCCATGTATCCGGGATTGAAGATCAAGATTCACGCGG  
CCGGCTTGTGAGCGAGCGTAGATTCCGTGCTTGGATCGGCGGCAGCATTCTGGCCAGTCTGGGTA

CTTTCCATCAGATGTGGATATCCAAGAAGGAGTATGAGGAAAACGGACCGGGCATTGTCGAGAAGC  
GATGCAAATAG

>*Trichoderma parareesei*

ATGGCCCAGCAGCCTTTGCCACGTCGGCGCAGCCAACCGACATTTACGGCGGAGATGAAGTTTCT  
GCCCTCGTCCTCGATCCCGGCTACTGCAATACGCGCGCGGGATACGCCGGCGAAGACGTGCCCAAG  
TCCATCCTGCCGTCTTCTACGGCCACATCACCAGCGACCCTCCCCGAGATCTCTTTGGCGATGAGTG  
CATCATCCCGCGCGGCGACTTCGAAGTCCGCAACTACATGAACAAGGACAGCGTCGTGGAGGACTG  
GGATGTTGCGGCCAAGCTCTGGGAGTTTATGCTGGTTAAGCGCCTGCAGCCCGAGCGGCAGACACA  
TCCGTCCAAGAACGGACTGAACGACGACATCAAGGAGCAGGATGGCGAGGGAGACGTGCCATGG  
AGGAGGTTGAGGGTCTGGAGAAGCCCCTGGAAGAGTTTCCCTTGTTGATGTCAGAAGCTCCCTGGA  
ACTCGCCCAAGGCGCGTGAAAAGGCCATTGAGCTGAGCATGGAGAGCTGGGGAACGCCCGCCTTCT  
GGCTGAGCCGGACACCCGTTCTGGCCTCTTTCGCGGCCGGCAAGGCCACAGCCCTGGTCATCGATGT  
CGGCGGGCGAAACACCTCCGTACGGCCATTACGACGGCATGGTTCTCAAGCGATCCATCCAGCGA  
TCACCCGCTGGCGGTTTGTGGCTGTCGTCGAAATCCGCAAGATGTGGGAGACGTCCGAGCCCAAG  
GTCGACCTGGTGCCACATTCATGGTTGAAAACAAGACGCCTGTGGATGCGCTCGCCCCTCCACAAG  
CACGACTACGCGAATTCCTTACAAGATCCACGACTCTTTCGAGCATTTGAAGAGGAGCGGGTGCT  
GACTGAGTTCAAAGAGTCCGTGTCGAAGTTTGGCGTGGCCCTGGACGATACGGCGCCGCTGGAAA  
CGAGGAGTACATCAAGTCACAGCCCGGGCGCGTCTTTGAGATGCCCGACGGGTACAACCAGATGTG  
GCGCGAGCAGCGGTTCAAGGTGGCGGAGGGAATGTGGGATGAAAACGCTGGGTACCCTCTTCCCG  
AGGAGGAGCGTCTCACAAGGCGCAGACCATTCCCGAGCTTATCCGCTCCGCCCTCAACTCTGTGCA  
TGTCGATCTTCGGGGCACTCTTCTCGGCAACGTCGTCGTCACGGGCAGCACGAGCTTGATCAACGGC  
TTCAACGACCGATTAACAACGAGCTGACGGCCATGTATCCCGGCCTGAAGATCAAGATCCACGCCG  
CGGGCTTGTGAGCGAGCGTAGATTCCGGCGCCTGGATCGGCGGCAGCATCTTGGCGAGTCTGGGTA  
CCTTCCACCAGATGTGGATATCCAAGAAGGAGTACGAGGAGAACGGAGCTGGCATTGTGGAGAAG  
CGATGCAAATAG

>*Trichoderma reesei*

ATGGCCCAGCAGCCTTTGCCACGTCGGCGCAGCCAACCGACATTTACGGCGGAGATGAAGTCTCT  
GCCCTCGTCCTCGATCCCGGCTACTGCAATACGCGCGCGGGCTACGCCGGCGAAGACGTCCCCAAG  
TCCATCCTGCCGTCTTCTACGGCCACATCACCAGCGACCCTCCCCGAGATCTCTTTGGCGATGAGTG  
CATCATCCCGCGCGGCGACTTCGAAGTCCGCAACTACATGAACAAGGACAGCGTCGTGGAGGACTG  
GGATGTTGCGGCCAAGCTCTGGGAGTTTATGCTGGTTAAGCGCCTGCAGCCCGAGCGGCAGACACA  
TCCGTCCAAGAACGGACTGAACGACGACATCAAGGAGCAGGATGGCGAGGGAGACGTGCCATGG  
AGGAGGTTGAGGGTCTGGAGAAGCCGCTGGAAGAGTTTCCCTTGTTGATGTCAGAAGCTCCCTGGA  
ACTCGCCCAAGGCGCGTGAAAAGGCCATTGAGCTGAGCATGGAGAGCTGGGGAACGCCCGCCTTCT  
GGCTGAGCCGGACGCCGTTCTGGCCTCTTTCGCGGCCGGCAAGGCCACTGCCCTGGTCATCGATGT  
CGGCGGGCGAAACACCTCCGTACGGCCATTACGACGGCATGGTTCTCAAGCGATCCATCCAGCGA  
TCACCCGCCGGCGGCCTGTGGCTGTCGTCGAAATCCGCAAGATGTGGGAGACGTCCGAGCCCAAG  
GTCGACCTGGTGCCACATTCATGGTTGAGAACAAGACGCCTGTGGATGCGCTCGCCCCTCCACAAG  
CACGACTACGCGAATTCCTTACAAGATCCACGACTCTTTCGAGCATTCGAAGAGGAGCGGGTGCT  
GACGGAGTTCAAAGAGTCCGTGTCGAAGTTTGGCGTGGCCCTGGACGATACGGCGCCGCTGGAA  
ACGAGGAGTACATCAAGTCACAGCCCGGGCGCGTCTTTGAGATGCCCGACGGGTACAACCAGATGT  
GGCGCGAGCAGCGGTTCAAGGTGGCAGAGGGAATGTGGGATGAAAACGCTGGGTACCCTCTTCCC  
GAGGAGGAGCGTCTCACAAGGCGCAGACCATTCCCGAGCTTATCCGCTCCGCCCTCAACTCTGTGCG  
ACGTCGACCTTCGGGGCACTCTTGGGCAACGTCGTCGTCACGGGCAGCACGAGCTTGATCAACG  
GCTTCAACGACCGATTAACAACGAGCTGACGGCCATGTATCCCGGCCTGAAGATCAAGATCCACGCC  
CGCGGGCTTGTGAGCGAGCGTAGATTCCGGCGCCTGGATCGGCGGCAGCATCCTGGCGAGTCTGG

GTACCTTCCACCAGATGTGGATATCCAAGAAGGAGTACGAGGAAAACGGAGCTGGCATTGTGGAG  
AAGCGATGCAAATAG

>*Trichoderma virens*

ATGGCCCAGCAGCCTTTGCCACGTGCGGCGCAGCCAACCGACATTTACGGCGGAGATGAGGTCTCT  
GCCCTCGTTCTCGACCCCGGCTACTGCAACACGCGAGCAGGCTTTGCCGGCGAAGATGTTCCCAAAT  
CAATCCTGCCGTCCTTCTATGGCCACATCACCAGCGACCCTCCCCGAGACCTGTTTGGCGATGAATGC  
ATCATCCCGCGCGGCGACTTCGAGGTCCGCAACTACATGAACAAGGACAGCGTCGTCGAGGATTGG  
GATGTCGCGCCAAAGATGTGGGAGTTTATGCTGGTCAAGCGTCTGCAGCCCAGAGACAGACACAT  
CCGTCCAAGAATGGATTGAACGATGATGTGAAAGATCAGGACGGCGAAGGAGATGTCGCGATGGA  
GGAAGTCGAGGGCCAGGAAAAGCCTCTGGAGGAATTCCTTTGTTGATGACAGAAGCTCCCTGGAA  
CTCACCCAAGGCGCGTGAAAAGGCGATTGAGCTTAGCATGGAGAGCTGGGGAACGCCGGCTTTCTG  
GTTGAGCCGGACACCTGTGCTGTCCGCCTTTGCTGCTGGCAAGGCTACTGCCCTTGTATCGATATC  
GGCGGCGCAAATACCTCCGTACAGCTATCCACGACGGCATGGTTCTCAAGAGATCTATTCAGCGAT  
CACCCGCGGGTGGCCTTTGGCTGTCTTCTCAAATCCGCAACATGTGGGAAACTTCGAGCCCAAGGT  
CGACTTGATCCCGACTTTTATGGTTGAGAACAAGACTCCCGTGGATGCCCTCGCCCCGCCAGGCA  
CGACTACGCGAATTCCTGTTCAAGATCCATGACTCCTTCCGAGCGTTCGAGGAGGAGCGGCTGCTGA  
CCGAATTCAAAGAGTCAGTCGTCGAGGTTTGGCGTGGTCTGGACGATATGGTGCCGCTGGAAACG  
AGGAATACATCAAATCACAGCCTGGCCGCGTGTGTTGAGATGCCCGATGGCTACAACCAGATGTGGC  
GTGAGCAGCGATTCAAGGTAGCTGAGGGAATGTGGGATGAGAACGCTGGATACCCCGTTCAGAG  
GCAGAGCGTCTACCAAAGCTCAGACCATTCCAGAGCTTATCCGTTCTGCTCTCAACGCCATTGATGT  
TGATCTTCGGGGCAATCTTCTTGCCAACGTTGTGGTACAGGCAGCACAAAGCTTGATCAACGGCTTC  
AACGACCGACTAAACAACGAGCTGACGGCCATGTATCCCGGACTGAAGATCAAGATCCATGCCGCC  
GGTTTGTGAGCGAGCGTAGGTTTCGGTGCCTGGATCGGTGGCAGCATTTTGGCCAGTCTGGGTACT  
TTCCATCAAATGTGGATATCCAAGAAGGAGTATGAGGAAAACGGACCGGGCATTGTTGAGAAACGA  
TGCAAATAG

---



**Appendix S2.** *cal1* cds retrieved from the genomes of the 13 species analyzed in the present work

>Trichoderma arundinaceum

ATGGCTGATTCTTACCGAAGAGCAGGTCTCCGAGTTCAAGGAGGCCTTCTCTCTTTGACAAGG  
ACGGTGATGGCCAGATCACCACCAAGGAGCTGGGCACCGTGATGCGCTCTTTGGGCCAGAATCCTT  
CCGAGTCAGAGTTGCAGGATATGATCAACGAGGTTGATGCCGACAACAACGGATCTATCGATTTCCC  
CGAGTTCCTTACCATGATGGCACGAAAAATGAAGGACTGATTCCGAGGAGGAGATCCGGGAGG  
CGTTCAAGGTCTTCGATCGCGATAACAACGGCTTCATCTCAGCCGCCGAGTTGCGCCATGTCATGAC  
GTCTATTGGTGAGAAGCTTACCGACGACGAGGTCGATGAGATGATCCGCGAGGCCGATCAGGACG  
GTGATGGCCGAATCGATTACAATGAGTTCGTTTCAGCTTATGATGCAAAAATAA

>Trichoderma asperellum

ATGGCTGATTCTTACCGAAGAGCAGGTCTCTGAGTTCAAGGAGGCCTTCTCTCTTTGACAAGG  
ACGGCGATGGCCAGATCACCACCAAGGAGCTGGGCACTGTCATGCGCTCTTTGGGCCAGAACCCT  
CCGAGTCAGAGCTGCAGGACATGATCAACGAGGTTGATGCCGACAACAATGGATCCATCGATTTCC  
CTGAGTTCCTTACCATGATGGCACGAAAAATGAAGGACTGATTCCGAGGAGGAGATCCGAGAGG  
CTTTCAAGGTCTTCGATCGCGATAACAACGGCTTCATCTCAGCTGCCGAGCTGCGCCATGTCATGAC  
ATCTATTGGCGAGAAGCTCACCGACGACGAGGTCGATGAGATGATTTCGTGAGGCTGATCAGGACG  
GTGATGGCCGAATTGATTACAACGAGTTTGTACAGCTTATGATGCAAAAATAA

>Trichoderma atrobrunneum

ATGGCTGATTCTTACCGAAGAGCAGGTCTCTGAGTTCAAGGAGGCCTTCTCCCTCTTTGACAAGG  
ACGGTGATGGCCAGATCACCACCAAGGAGCTGGGCACCGTGATGCGCTCTCTCGGCCAGAACCCT  
CCGAGTCAGAGCTTCAGGACATGATCAACGAGGTCGATGCCGACAACAACGGATCTATCGATTTCCC  
TGAATTCCTGACCATGATGGCACGAAAGATGAAGGACTGATTCCGAGGAGGAGATCCGAGAGG  
CATTCAAGGTCTTTGACCGCGACAACAACGGCTTCATCTCAGCCGCTGAGCTGCGCCATGTCATGAC  
ATCCATCGGCGAGAAGCTCACCGACGACGAGGTCGATGAGATGATTTCGCGAGGCCGATCAGGACG  
GTGATGGCCGAATTGATTACAATGAGTTTGTCCAGCTTATGATGCAAAAATAA

>Trichoderma atroviride

ATGGCTGATTCTTACCGAAGAGCAGGTCTCTGAGTTCAAGGAGGCCTTCTCTCTTTGACAAGG  
ACGGCGATGGCCAGATCACCACCAAGGAGCTGGGCACTGTCATGCGCTCTTTGGGACAGAACCCT  
CCGAGTCAGAGCTGCAGGACATGATCAACGAGGTCGATGCCGACAACAACGGATCCATCGATTTCC  
CTGAGTTCCTTACCATGATGGCACGAAAAATGAAGGACTGATTCCGAGGAGGAGATCCGAGAGG  
CTTTCAAGGTCTTTGACCGTGATAACAACGGCTTCATCTCAGCTGCTGAGCTGCGCCATGTCATGACA  
TCTATTGGCGAGAAGCTCACCGACGACGAGGTCGATGAGATGATTTCGCGAGGCTGATCAGGATGGT  
GATGGCCGAATTGATTACAACGAGTTTGTTCAGCTCATGATGCAAAAATAA

>Trichoderma sp. T154

ATGGCTGATTCTTACCGAAGAGCAGGTCTCTGAGTTCAAGGAGGCCTTCTCCCTCTTTGACAAGG  
ACGGTGATGGCCAGATCACCACCAAGGAGCTGGGCACCGTGATGCGCTCCCTCGGCCAGAACCCT  
CCGAGTCAGAGCTGCAGGACATGATTAACGAGGTCGATGCCGACAACAACGGATCTATCGATTTCC  
CCGAATTCCTGACCATGATGGCACGAAAGATGAAGGACTGATTCCGAGGAGGAGATCCGAGAG  
GCATTCAAGGTCTTTGACCGCGACAACAACGGCTTCATCTCAGCCGCTGAGCTGCGCCATGTCATGA  
CATCCATCGGCGAGAAGCTCACCGACGACGAGGTCGATGAGATGATTTCGCGAGGCCGATCAGGAC  
GGTGTGATGGCCGAATTGATTACAATGAGTTTGTCCAGCTTATGATGCAAAAATAA

>Trichoderma citrinoviride

ATGGCTGATTCTCTACCGAAGAGCAGGTCTCCGAGTTTAAGGAGGCCTTCTCTCTTTGACAAGG  
ACGGCGATGGCCAGATCACCACCAAGGAGCTGGGCACCGTGATGCGCTCTCTGGGCCAGAACCCT  
CCGAGTCGGAGCTGCAGGACATGATCAACGAGGTCGATGCCGACAACAACGGCTCCATCGACTTCC

CTGAATTTCTACCATGATGGCACGGAAAATGAAGGACACCGATTCCGAGGAGGAGATCCGGGAG  
GCATTCAAGGTCTTTGACCGTGACAACAACGGCTTCATCTCCGCTGCCGAGCTGCGCCATGTCATGA  
CTTCCATCGGCGAGAAGCTGACCGACGACGAGGTTCGATGAGATGATTCGCGAGGCCGACCAGGAC  
GGCGACGGCCGAATCGACTACAACGAGTTTGTCCAGCTCATGATGCAGAAATAA

>Trichoderma gamsii

ATGGCTGATTCACTTACCGAAGAGCAGGTCTCTGAGTTCAAGGAGGCCTTCTCTCTTTGACAAGG  
ACGGTGATGGCCAGATCACCACCAAGGAGCTCGGCACTGTCATGCGCTCTTTGGGACAGAACCCT  
CCGAGTCAGAGCTGCAGGACATGATTAACGAGGTTCGATGCCGACAACAACGGATCCATCGATTTCC  
CTGAGTTCCTTACCATGATGGCACGAAAATGAAGGACACCGATTCCGAGGAGGAGATCCGAGAGG  
CTTTCAAGGTCTTCGACCGCGATAACAACGGCTTCATCTCAGCTGCCGAGCTGCGCCATGTCATGAC  
ATCTATTGGCGAGAAGCTCACCGACGACGAGGTTCGATGAGATGATTCGTGAGGCCGATCAGGATG  
GTGATGGCCGAATTGATTACAACGAGTTTGTTCAGCTCATGATGCAAAAATAA

>Trichoderma guizhouense

ATGGCTGATTCTTACCGAAGAGCAGGTCTCTGAGTTCAAGGAGGCCTTCTCCCTCTTTGACAAGG  
ACGGTGATGGCCAGATCACCACCAAGGAGCTGGGCACCGTGATGCGCTCCCTCGGCCAGAACCCT  
CCGAGTCAGAGCTGCAGGACATGATCAACGAGGTTCGATGCCGACAACAACGGATCTATCGATTTCC  
CCGAATTCCTGACCATGATGGCACGAAAGATGAAGGACACTGATTCCGAGGAGGAGATCCGAGAG  
GCATTCAAGGTCTTTGACCGCGACAACAACGGCTTCATCTCAGCCGCTGAGCTGCGCCATGTCATGA  
CATCCATCGGCGAGAAGCTCACCGACGACGAGGTTCGATGAGATGATTCGCGAGGCCGATCAGGAC  
GGTGATGGCCGAATTGATTACAATGAGTTTGTTCAGCTTATGATGCAAAAATAA

>Trichoderma hamatum

ATGGCTGATTCTTACCGAAGAGCAGGTCTCTGAGTTCAAGGAGGCCTTCTCTCTTTGACAAGG  
ACGGCGATGGCCAGATCACCACCAAGGAGCTGGGCACCGTGATGCGCTCTTTGGGCCAGAACCCT  
CCGAGTCAGAGCTGCAGGACATGATCAACGAGGTTCGATGCCGACAACAACGGATCCATCGATTTCC  
CTGAGTTCCTTACCATGATGGCACGAAAATGAAGGACACTGATTCCGAGGAGGAGATCCGAGAGG  
CTTTCAAGGTCTTCGACCGTGACAACAACGGTTTCATCTCAGCTGCCGAGCTGCGCCATGTCATGACT  
TCTATTGGCGAGAAGCTCACCGACGACGAGGTTCGACGAGATGATTCGTGAGGCTGATCAGGACGGT  
GATGGCCGAATTGATTACAACGAGTTTGTTCAGCTGATGATGCAAAAATAA

>Trichoderma harzianum

ATGGCTGATTCTTACCGAAGAGCAGGTCTCTGAGTTCAAGGAGGCCTTCTCCCTCTTTGACAAGG  
ACGGTGATGGCCAGATCACCACCAAGGAGCTGGGCACCGTGATGCGCTCCCTCGGCCAGAACCCT  
CCGAGTCAGAGCTCCAGGACATGATCAACGAGGTTCGATGCCGACAACAACGGATCTATCGATTTCC  
CGAATTCCTGACCATGATGGCACGAAAGATGAAGGACACTGATTCCGAGGAGGAGATCCGAGAGG  
CATTCAAGGTCTTTGACCGCGACAACAACGGCTTCATCTCAGCCGCTGAGCTGCGCCATGTCATGAC  
ATCCATCGGCGAGAAGCTCACCGACGACGAGGTTCGATGAGATGATTCGCGAGGCCGATCAGGATG  
GTGATGGCCGAATTGATTACAATGAGTTTGTTCAGCTTATGATGCAAAAATAA

>Trichoderma parareesei

ATGGCTGATTCTTACCGAAGAGCAGGTCTCTGAGTTCAAGGAGGCCTTCTCCCTCTTTGACAAGG  
ACGGCGATGGCCAGATCACCACCAAGGAGCTGGGCACCGTGATGCGCTCTCTCGGCCAGAACCCT  
CCGAGTCGGAGCTGCAGGACATGATCAACGAGGTTCGACGCCGACAACAACGGTTCCATCGACTTCC  
CTGAATTTCTACCATGATGGCACGAAAATGAAGGACACCGACTCCGAGGAGGAGATCCGGGAG  
GCATTCAAGGTCTTTGACCGCGACAACAACGGCTTCATCTCTGCTGCTGAGCTGCGCCACGTCATGA  
CCTCCATCGGCGAGAAGCTGACCGACGACGAGGTTCGATGAGATGATTCGCGAGGCCGACCAGGAC  
GGCGATGGCCGAATCGACTACAACGAGTTTGTTCAGCTCATGATGCAGAAATAA

>Trichoderma reesei

ATGGCTGATTCTTACCGAAGAGCAGGTCTCTGAGTTCAAGGAGGCCTTCTCCCTCTTTGACAAGG  
ACGGCGATGGCCAGATCACCACCAAGGAGTTGGGCACCGTGATGCGCTCTCTCGGCCAGAACCCT

CCGAGTCGGAGCTGCAGGACATGATCAACGAGGTTGACGCCGACAACAACGGCTCCATCGACTTCC  
CTGAATTTCTCACCATGATGGCACGAAAAATGAAGGACACCGATTCCGAGGAGGAGATCCGGGAGG  
CATTCAAGGTCTTTGACCGCGACAACAACGGCTTCATCTCTGCTGCTGAGCTGCGCCACGTCATGAC  
CTCCATCGGGGAGAAGCTGACCGACGACGAGGTCGACGAGATGATCCGCGAGGCCGACCAGGACG  
GCGATGGCCGAATCGACTACAACGAGTTTGTCCAGCTCATGATGCAGAAATAA

>Trichoderma virens

ATGGCTGATTCTCTTACCGAAGAGCAGGTCTCTGAGTTCAAGGAGGCCTTCTCTCTTTGACAAGG  
ACGGTGATGGCCAGATCACCACCAAGGAGCTGGGCACCGTGATGCGCTCTCTGGGCCAGAACCCCT  
CCGAGTCAGAGCTGCAGGACATGATCAACGAGGTCGATGCCGACAACAACGGATCTATCGATTTCC  
CTGAATTCCTGACCATGATGGCACGAAAGATGAAGGACACTGATTCCGAGGAGGAGATCCGAGAG  
GCATTCAAGGTCTTTGACCGCGACAACAACGGCTTCATCTCAGCCGCCGAGCTGCGCCATGTCATGA  
CATCCATCGGGGAGAAGCTCACCGACGATGAGGTCGATGAGATGATTCGTGAGGCCGATCAGGACG  
GTGATGGCCGAATTGATTACAATGAGTTTGTCCAGCTTATGATGCAGAAATAA

---

**Appendix S3.** *fas1* cds retrieved from the genomes of the 13 species analyzed in the present work

>Trichoderma arundinaceum

```
ATGCGTCCCGAAGTCGAGCAAGAGCTCGCCACACGCTCCTCGTTGAGCTTCTGGCATATCAATTCCG
CCTCTCCCGTGAGGTGGATTGAGACCCAGGATGTGTTCTGGCAGAGAAGACGGCCGAGCGCATTG
TTGAAGTCGGCCCCGAGATACCCTTGGAGTCATGGCCAAGCGCACATTGGCGTCCAAGTATGAGG
CCTACGATGCCGCCAAGTCGGTTCAGCGACAGATCCTTTGCTACAACAAAGATGCCAAGGAGATTTA
TTACGATGTCGACCCTGTTGAAGAAGAGCCCGAGCCCGCCGCCAGCTCATCCAGTGCCCCCTCC
AGTCAGCCCCGCTGCTGCTGCAGCTGCCCGCCAGTTGCTGCCGCTCCGGCTCCAGCGCAGGGCCTG
CGGCTCAGGTTCCCGATCAGCCTGTGCAAGCTATCGACATTGTGCACACATTGGTTGCGCAAAAGCT
CAAGAAGTCTTTGCTGATGTGCCACTAAGCAAGGCCATCAAGGATCTTGTGGAGGCAAGTCCACT
CTCCAAAATGAGATCCTCGGTGATCTTGAAAGGAATTCGGCTCAACGCTGAGAAGCCCCGAGGAT
ACACCGCTCGACGAGCTCAGTGTGCCATGGGTGCTACTTTGATGGTAACCTGGGCAAGCACTCAA
CATCACTCATCGCCAGATTGATCTCTCAAAGATGCCTGGTGGTTTCAACATCACAGTGGCAAGAAA
ATACCTGGAATCAAGATGGGGCCTTGGTCCCGGCAGACAAGATGGAGCATTGCTGCTGGCCTTGAC
CATGGAGCCTCCTGCTCGTCTAGGAAATGAAGGTGAAGCCAAGGGATACCTTGACGGGATCGTCCA
GAAATACGCTGCAAACGCTGGTATCAGCCTGACAACCGCTGCTTCCTCTGGTGGCTCTGAAGGTGGT
GCGGGAGGCATGATGATGGACCCCGCCGATTGACGCTCTACCAAGGACCAACGAGCCCTGTTC
AAGCAGCAGTTGGAGCTCTTGCCAGATATCTCAAGATGGACCTTCGGGCAGGTGACAGGGCGCAC
ATTGAATCCCAAAAATCAGAAAAGGTCCTGCAGGCCAGCTTGATTTGTGGACTGCAGAACATGGT
GACTTCTACGCCTCCGGCATTGAGCCTGTCTTCAGCCCATTGAAGGCTAGGTCATACGACTCATCTTG
GAACTGGGCTCGTCAAGATGCACTCACCATGTTCTATGACATCATCTTCGGCAGACTCAAGACCGTC
GACCGCGAAATTGTCAGCCAGTGCATACGATTATGAACAAGTCAAACCCCAAGCTCCTCGAGTTTA
TGCAGTACCACATCGATAACTGCCCAACCGAGCGTGGCGAGACCTACCAGCTCGCCAAGGAACTTG
GCCAGCAGCTCATCGAGAACTGCAAGGAGGTGCTGGATCTGTCTCCTGTCTACAAGGACGTTGCCG
TGCCACCCGGTCTCGCACCCCGTGGACGCCCGCGGCAACCTCAACTACGAGGAAGTTCTCGTGC
CAGCTGCAGGAAGCTTGAGCATTATGTTTCAGCAGATGGCCGAGGGCGGAAAGATTTCCGAGTATGG
CAACCGCACCAAGGTACAGAACGATCTCCAGCGCATCTATAAGTTGATCAAGCAGCAGCACAAAGAT
GTCCAAGACTTCTCAGCTCGAGATCAAGAGCCTGTACGGTGATGTTCTGCGCTCTTGCCATGAAC
GAGAGCCAGATCATCCCCAAGGAGAACGGCAAGGGCAGAAAGCCTGGCCTGAAGGGCACAAGCCT
TAACAAGGGCAGGGTCGAGACGATCCCATTCCTCACCTCAAGAGAAAACTCTACACGGCTGGGA
TTACAGCAAGAAGCTCACTGCTGTCTACCTCAACTCTCTCGAAGAGGCTGCCAAGGATGGTGTACC
TTCCAGGACAAGTATGTCTTGATGACTGGCGCTGGTGCCGGCTCCATTGGTGCCGAGGTTCTGCAGG
GCCTCGTCAGCGGAGGTGCCAAGGTGGTGGTTACTACTAGCCGATTCTCTCGAGAAGTCACAGAGT
ATTACCAGTCCGTGTACACCCGCTTCGGCTCTCGTGGATCTCAAATCGTTGTCGTCCCCTTTAATCAG
GGAAGCAAGCAAGACGTTGAGGCACTTGTCAACTACATCTATGACACCAAGAACGGCCTTGCTGG
GATCTCGACTACATTGTTCTTTGCGCCATCCCCGAGAATGGTCGACAGATTGATAGCATCGACTC
CAAGTCTGAGTTGGCTCACCGTATCATGCTCACCAACTTGGTCCGCATGCTTGGCTTTGTCAAGGCTC
AGAAGGCTGAGCGCGGATTTGAGACTCGTCTGCCAAGTTGTCCTCCCTCTGTCCCCCAACCACGG
TACCTTCGGTAACGATGGTCTCTACTCCGAGTCCAACTGGCTCTCGAGACCCTCTTCAACCGATGGC
ACTCTGAGAGCTGGGGCCACTATCTCACGATTTGTGGTGTGTTATTGGATGGACTCGCGGTACTGG
TCTCATGTCTGGCAACAATATTGTCGCCGAGGGCGTTGAGGCGTTCGGCGTGCGAACATTCTCTCAG
CAAGAGATGGCATTAACTCTTGGGTTTGATGTCCGCTACCATTGTTGACCTTTGCCAGTCAGAGCC
AGTCTTTGCCGACTTGAACGGAGGTCTGCAATTCATCCCCAAGTTGAACGAATCCATGACCAAGCTC
CGCAAGGACATCATGGAGACTAGTAAATCCGCCGAGCCGTTAGCAAGGAGAGCGCTATCGAGAA
TACCATTGTCAACGGTGTGACTCAGAGGTTCTCTATAAGAAGAAGACCATCGAGCCCCGCGCCAAC
```

ATCAAGTTTGACTTCCCTCCCTTGCCCGACTGGAAGACGGAGGTGGCTCCACTCAACGACCAGCTGA  
AGGGCATGGTCGATTTGGAGAAGGTCGTTGTCGTGACTGGTTTTGCGGAAGTTGGTCCTTGGGGCA  
ACTCTCGAACTCGATGGGAAATGGAGGCCTATGGCGAGTTCTCGCTCGAGGGTTGCATTGAGATGG  
CCTGGATCATGGGTCTTATCAAGAATCACACGGCCCTCTCAAGGGCAAGCCTTATGCCGGCTGGGT  
TGATGCCAAGTCTGGCGAGCCGTTGATGACAAGGACGTTAAGCAAAGTACGAGAAGTACATTCT  
GGAACACTCCGGTATTGCTTATTGAGCCCGAGTTGTTGATGGATATGACCCCAACAAGAAGCA  
GCTGCTTACGAGGTCGTCATTGAGCAGGACCTTGAGCCGTTGAGGCCTTAAGGAGACTGCGGA  
AGAATTCCGACGTGAACATGGCGACAAGGTGGAGATTTTTGAGATCCCCGAGTCAGGAGAGTATAT  
TGTCCGGGTAAAGAAGGGCGCTTCCGCTCTGGATCCCCAAGGCGCTGCGCTTCGACAGACTCGTCGC  
TGGTCAAATCCCACTGGCTGGGACCCCAAGCGATATGGTGTTCCCGAGGATATCATCAGCCAGGT  
GGACCCTGTCACATTGTTCTCCTCGTGTCCACTGCTGAGGCCCTCCTGTCTTCTGGTATTACTGATCC  
ATACGAGTTCTACAAGTATGTCCACGTCTCCGAGGTTGGTAACATCGTCGGCTCTGGTATGGGTGGC  
GCTGCAGCCCTGCGTGGCATGCACAAGGCCGATTCTCGACAAGCCTCTCCAGAACGATATCTTGC  
AGGAGTCTTTCATCAACACCATGGCTGCATGGGTTAACATGTTGCTTCTCTTCTTCTGGTCTATCA  
AGACACCTGTCGGCGCTTGTGCTACTGCCATCGAGTCTGTGCACATTGGTGTGAGACGATCATGGA  
AGGCAAGGCCGATCTGCCTGGTCGGCGGCTTCGACGACTTTGGTGAGGAAGGTTCTTACGAGTT  
TGCCAACATGAAGGCTACTAGCAACACAATGGATGAGTTTGCCACGGTCGTACGCTGGTGAAAT  
GTCGCGTCTATGACCACTACCCGAAATGGATTTATGGAGTCTCAGGGATGTGGTGTCCAGGTCATC  
ATGACCGCCAAGCTCGCTCTGGAGATGGGAGTCCCAATTCACGGTATCCTTGCTTTCACCACTACTGC  
CTCTGACAAGATTGGACGATCCGTCCCCGCCCTGGCCAAGGTGTTCTCACATCCGCCCGAGAGCAT  
GTCGGCAAGTTCCCATCGCCGCTGCTTGATCAACTACCGTCGCCGACAGATTGAGCGCCGCAAGA  
AGCAGATCAAGCAATGGGAAGAGTCTGAGCTGGAGTTCCTGCACGATGAGATTGATGCTATGAAGG  
CCCAAGGCGGTGCATTCGACGAGAAGGAGTACGCTCAGGATCGCGTGGCACACATCCAGAAGGAG  
GCCGAGAGACAAGAAAAGGAGCTTCTCCGAAGCATGGGTAACAACCTTCTGGAAGAGCGACCCAAC  
CATTGCTCCGCTCCGAGGCGCCCTTGCAACCTGGGGTCTTACTATCGATGACCTGAAGGTTGCCTCG  
TTCCACGGCACATCCACTGGTGCCAACGACAAGAACGAGTCCCTCGGCCATTTGCCAGCAGCTGCGCC  
ACCTTGGCCGAAGCAAGGGCAACGCAGTCCCTGGTGTCTTCCAAAAGTATCTCACTGGTCACCCCAA  
GGGTGCTGCAGGTGCTTGGATGATGAACGGCGGTCTGCAAATCTAAACTCTGGTCTGGTTCCCGG  
CAACAGAAATGCTGACAATATTGACCCCATCATGGAGAACTATGACCTGATCGTCTACCCAGCCGT  
AGCATCCAGACTGACGGAGTCAAGGCTTTCTCCCTCACCTCGTTTCGGTTTCGGGCAGAAGGGAGCCC  
AGGCAGTCGGCGTCCACCCCAAGTATCTGTACGCCACCCTGGACCAGAAGACTTACCAGGAGTACT  
GTGCCAAGGTTGAGGCCCGACAGAAGAAGGCCTACCGTTTCTTCCACAGCGGCATGATCAGCAACG  
CCCTGTTCTGTTCCAAGTCTCACGCTCCTTACAATGAGGAGCAGCTCAGCGCCGTGCTGCTGAACCC  
GATGCTCGTGTAAACCGAAGACAAGAAGACTGCAGAACTCAAGTATCCGGCCAATTTTATGAAGGCG  
TCTGAAAAGACTCCCTCTGCAACTGCCGTCAAGGAGACACAGCAGGTTATCGAGGCGCTTGCACACA  
AGGTGACGAGCAAGAACAGCAACGTGGGCGTCGATGTGAGGATATTACATCCTTCAACATTGAGA  
ACGACACATTATTGAGCGCAACTTTACCAGCCAGGAAGTGGCTTATTGCAAGAGTGCGCCAGCCC  
ACAGAGCTCATTGCGCCGTCGATGGAGCGCCAAGAGGCGGTATTTAAAGCTCTTGGTGTGACGAG  
CAAGGGAGCCGGCGCTGCCTTGAAGGACATTGAAATCCTCAAGGACGATACTGGCGCGCCTGTTGT  
TTCTTTCATGGCGATGCGGCCCGCCGCTGCCAAGCAGGCTGGCGTGAAGGAGGTTTCGGTCTCCATC  
TCGCATGCTGACAAGCAGGCTGTTGCCGTGGCAGTTGCTCACTTTAA

>Trichoderma asperellum

ATGCGTCCTGAAGTTGAGCAAGAGCTCGCTCACACGCTCCTCGTTGAGCTTCTAGCATACCAAGTTCCG  
CCTCTCCCGTCAGGTGGATTGAGACTCAGGATGTGTTCCCTGGCAGAGAAGACGGCCGAGCGCATCG  
TCGAAGTCGGCCCCGAGATACCCCTCGGAGTGATGGCCAAGCGCACATTGGCGTCCAAATACGAAG  
CGTACGACGCGGCCAAGTCTGTTACGCGACAGATCCTCTGCTACAACAAGGATGCCAAGGAGATTT  
ACTACGATGTTGACCCCGTTGAAGAAGAGCCCCGAGCCTGCTGCGGCCAGCTCATCAGATGCCCCCA

GCCAGCCTGCTGCGGGCGCTCCCGCGGCTGCAGCTGCGCCGGTTGCTGCTGCTCCGGCTCCCTCCTC  
AGGGCCTGCAGCTCAGGTTCTGATCAGCCAGTGCAGGCTGTCGACATCGTACATACCATCGTTGCG  
CAAAAACCTCAAGAAGTCTCTTAGTGATGTGCCGTTGAGCAAGGCCATCAAGGATCTGGTTGGAGGC  
AAATCTACTCTTCAAATGAGATTCTTGGTGATCTTGGAAAGGAATTCGGCTCAACGCCTGAGAAGC  
CTGAAGATACGCCTCTCGACGAGCTCAGCGCTTCCATGCAGGCCACCTTCGACGGCAACCTGGGCAA  
GCACACACAGTCACTCATCGCCAGATTGATCTCCTCGAAGATGCCTGGCGGCTTCAATATCACAGTA  
GCAAGAAAATACCTGGAAACAAGATGGGGCCTTGGTTCTGGTAGACAAGACGGAGCACTGCTGCTG  
GCTTTGACCATGGAGCCTGCTGCTCGTCTAGGAAATGAAGGCGATGCCAAGGGATTCTTGATGGG  
GTTGTCCAGAAGTATGCCGCAAACGCCGGTATCAGCCTGACGTCTGCGGCTGCCTCTGGTGGCTCCG  
AAGGTGGCTCTGGAGGCATGATGATGGATCCCGCTGCCATTGACGCCCTACCAAGGACCAGCGAG  
CTCTGTTCAAGCAACAACCTGGAGCTCTTTGCCGATACCTCAAGATTGATCTCAGGTCTGGCGACAA  
GGCGCATATTGAGTCTCAAAAATCAGAAAAGATCCTGCAGGCCAGCTCGACCTGTGGACCGCAGA  
GCACGGCGACTTCTATGCCTCTGGTATTGAGCCCGTCTTCAGCCCATTGAAGGGGAGATCTTACGAC  
TCATCCTGGAACCTGGGCTCGTCAAGATGCACTCACTATGTACTATGACATTATTTTTGGTAGACTCAA  
GACTGTGACCGTGAAATTGTGACCCAGTGCATCCGTATCATGAACAAATCTAACCCCAAGCTTCTC  
GAGTTCATGCAGTATCACATCGATAACTGCCCTACTGAGCGCGGTGAGACCTACCAGCTCGCCAAAG  
AACTTGGTCAGCAGCTCATTGAGAACTGCAAGAAGTTTTGGAGCTGTCTCCTGTCTATAAGGACGT  
TGCTGTCCCCACTGGTCTCGCACCACCGTGGATGCGCGTGCCAACCTCAACTACGAGGAAGTTCTC  
CGCGCCAGCTGCAGAAAACCTCGAGCACTACGTCCAACAGATGGCCGAGGGTGGAAAGATTTCCGAG  
TATGGCAACCGCACCAAGGTGCAAAACGACCTGCAGCGTATCTACAAGTTGATTAAGCAGCAGCAC  
AAGATGTCCAAGACTTCTCAGCTCGAAATCAAGAGCTTGTACGGTGATGTTTTGCGCTCTCTGGCCA  
TGAACGAGAGCCAGATCATTCCCAAGGAGAACGGCAAGGGCCGAAAGTCCGGCCTGAAGGGCACC  
AGCCTGAACAAGGGCAGGGTTGAGACCATCCATTCTTCTCAAGAGAAAGACCCTGCACGGCT  
GGGACTACAGCAAGAAGCTCACTGCTGTCTACCTCAACTCTTTGAGCAGGCTGCCAAGGATGGTGT  
CACTTTCCAGGACAAGTATGTCTTGATGACTGGTGTGGTGCCGGATCCATTGGTGTGAGGTTCTG  
CAGGGCCTCGTCACTGGAGGTGCCAAGGTTGTGGTCACTACCAGTCGATTCTCCCGAGAGGTCACT  
GAGTACTACCAGGCCATGTACACCCGTTTTGGCTCTCGCGGATCTCAGATCGTTGTGTCCTCCCTTCAA  
CCAGGGAAAGCAAGCAAGACGTGAGGCCCTCGTTGACTACATCTACGACACTAAGGCGGGTCTTGG  
CTGGGATCTCGACTACATTGTTCTTTGCTGCCATTCTGAGAATGGCCGACAGATTGATAACATCG  
ACTCCAAGTCGGAGCTGGCCACCGTATTATGCTGACCAACTTGATCCGCATGCTCGGTTACGTCAA  
GTCTCAAAGGCTGAGCGAGGCTTCGAAACTCGTCCCGCTCAAGTCGTCTTCCCCTGTCTCCTAACC  
ACGGTACCTTTGGTAACGACGGTCTCTACTCCGAGTCTAAGCTCGCTCTCGAGACTCTTCAACCGA  
TGGCACTCTGAGGACTGGGGCCACTACCTCACAATTTGCGGTGCTGTTATTGGATGGACTCGCGGTA  
CTGGTCTCATGTCTGGCAACAACATTGTTGCCGAGGGTGTGAGGCTTTTGGCGTCCGAACATTCTCT  
CAGCAAGAGATGGCTTTCAACCTCTTGGGTCTGATGTCCGCTACCATTGTCGACCTCTGCCAGTCAG  
AGCCCGTCTTTGCCGACTTGAACGGTGGCTTGAATTCATCCCAACCTGAACGAGGCCATGACCAA  
GCTTCGCAAGGATATTATGGAGACTAGTGAATCCGCAGAATCGTTTCTAAGGAGAGCGCTATCGA  
GAACACTATTGTCAACGGAGCCGACTCCGAGGTCCTTTACAAGAAGAAGACCATCGAGCCCCGTGC  
CAACATCAAGTTTGACTTCCCTCATCTGCCGACTGGAAGACCGAGGTCGCTCCTCTTAACGACCAGC  
TCAAGGGCATGGTCGACCTGGAGAAGGTAGTTGTCGCTACTGGTTTTCGCGGAAGTCGGCCCTGGG  
GTAACCTCGAACTCGATGGGAGATGGAGGCCATGGCGAATTCTCGCTCGAAGGCTGCATTGAAA  
TGGCCTGGATCATGGGTCTCATCAAGAACCACAATGGTCTCTCAAGGGCAAGCCTTACGCTGGCTG  
GGTTGATGCTAAGACCGGCGAACCTGTTGATGACAAGGACGTCAAGCAGAAGTACGAGAAGTTCAT  
TCTGGAACACGCCGGTATTGTTTTGATTGAGCCTGAGCTGTTGATGGATACGACCCCAACAAGAAG  
CAGCTGCTTACGAGGTTGTCATTGAAGAGGACCTTGAGCCATTGAGGCTTCCAAGGAGACTGCC  
GAAGAGTTCGACGAGAACATGGTGATAAGGTGGAGATTTTCGAGATCCCCGAGTCTGGAGAGTAC  
ACTGTCCGAGTGAAGAAGGGCGCCTCGCTCTGGATCCCCAAGGCTCTGCGCTTCGACAGACTCGTC



AGGAGGTGCGGGAGGCATGATGATGGATCCCGCCGCCATTGATGCTCTACCAAGGACCAGCGCG  
CCCTGTTCAAGCAGCAGCTGGAGCTCTTTGCCAGATACCTCAAGATGGACCTCCGGGCGGCGACA  
AGGCACACATTGACTCCCAGAAATCAGAAAAGGTTCTCCAAGCTCAGCTGGATCTGTGGACCGCCG  
AGCACGGTGATTTCTACGCTTCTGGTATCGAGCCTGTCTTTAGCCCGCTCAAGGCTAGATCCTACGAC  
TCCTCTGGAAGTGGGCTCGTCAGGATGCGCTACCATGTTCTACGACATTATCTTTGGCAGACTCAA  
GACCGTCGACCGTGAAATTGTCAGCCAGTGCATTTCGCATCATGAACAAGTCAAATCCCAAGCTCCTC  
GAGTTTATGCAGTACCACATCGACAACCTGCCCTACTGAGCGCGGTGAGACCTACCAGCTGGCTAAG  
GAACTTGGTCAGCAGCTCATTGAGAACTGCAAGGACGTTCTGAACCTTTCTCCCGTCTACAAGGACG  
TTGCTGTTCCCACTGGTCTCGACCACTGTGGACGCTCGTGGCAACCTCAACTACGAAGAAGTTCCC  
CGCGCCAGCTGCAGGAAGCTCGAACACTACGTTTCAGCAGATGGCTGAGGGTGGAAAGATTTCCGAG  
TATGGCAACCGCACCAAGGTGCAGAACGACCTGCAGCGTATCTACAAGTTGATCAAGCAGCAGCAC  
AAGATTTCCAAGACTTCTCAGCTCGAGATCAAGAGCCTTTACGGCGATGTTCTGCGCTCCCTGGCCAT  
GAACGAGAGCCAGATCCTCCCAAGGAGAATGGCAAGGGCCGAAAGCCGGGTCTCAAGGGCACAA  
ACCCCAACAAGGGCCGAGTCGAGACCATCCCTTCTCCACCTCAAGAGAAAGACCCTGCACGGCTG  
GGACTACAGCAAGAAGCTCACTGCTGTCTACCTCAACTGTCTTGAGGAAGCCGCCAAGGATGGTGT  
CACCTCCAGGACAAGTATGTCCTGATGACTGGTGTGGTGCCGTTCCATTGGTGCCGAGGTCTCG  
CAGGGCCTCATCAGCGGAGGAGCCAAGTTGTGGTCACTAGCCGATTCTCTCGACAGGTGACC  
GAGTACTACCAGTCCATGTACAGCCGCTTTGGCTCTCGCGGATCGCAAATCGTTGTGCTTCCCTTCAA  
CCAGGGAAAGCAAGCAGGATGTGGAGGCCCTTGTGACTACATCTACGACGCCAAGAACGGTCTCGG  
CTGGGATCTCGACTTCATTGTTCCCTTTGCTGCCATCCCTGAGAACGGCCGACAGATTGATAGCATCG  
ATTCCAAGTCGGAGCTGGCTACCGTATTATGCTACCAACTTGATCCGCATGCTTGGCTGCGTCAA  
GACTCAAAGGCCGAGCGTGGCTTTGAGACCCGTCGCCCCAGGTCGTCTCCCTCTGTCCCCAAC  
CACGGTACCTTCGGTAACGATGGTCTCTACTCCGAGTCCAAGCTCGCTCTCGAGACCCTCTCAACCG  
ATGGCACTCAGAGGACTGGGGCCACTACCTACCATTTGCGGTGCTGTTATTGGATGGACTCGTGGT  
ACTGGTCTCATGTCTGGCAACAACGTTGTTGCTGAGGGTGTGGAGGCGTTCGGCGTGCGAACCTTCT  
CCCAGCAAGAGATGGCCTTCAACCTGTTGGGCCTGATGTCAGCTACTATTGTTGATCTCTGCCAGTCA  
GAGCCCGTCTTTGCCGACTTGAACGGTGGCCTGCAATTCATCCCCAACCTGAACGAGTCCATGACCA  
AGCTCCGCAAGGATATCATGGAGAGTAGCGAAATCCGCAGAGCCGTTACCAAGGAGAGCGCTATCG  
AGAACACCATTGTTAACGGAGCCGACTCCGAGGTTCTTTACAAGAAGAAGACCATCGAGCCCCGTG  
CCAACATCAAGTGTGACTTCCCTCACCTGCCTGACTGGAAGACGGAGGTGGCCCTCTCAACGACCA  
GCTGAAGGGCATGGTTGACTTGGAGAAGGTCATTGTCGTGACCGGTTTTGCGGAAGTTGGTCCCTG  
GGTAACCTCCGAACCTCGATGGGAGATGGAGGCTTACGGCGAGTTTTCGCTCGAAGGTTGCATCGA  
AATGGCCTGGATCATGGGCCTTATCAAGAACCACAACGGCCCCCTCAAGGGCAAGCCCTACGCTGG  
CTGGGTTGACGCCAAGACTAGCGAGCCCGTCGATGACAAGGATGTCAAGCAGAAGTACGAGAAAC  
ACATCTGGAGCACTCTGGTATTCGTTTGATCGAGCCCGAGCTGTTTCGACGGATATGACCCCAACAA  
GAAGCAGCTGCTCCACGAGGTCGTATTAGGAGGACCTGGAGCCTTTTCGAGGCTTCCAAGGAGAC  
TGCAGAGGAATTCCGACGCGAGCACGGTGACAAGGTGGAGATTTTCGAGATCCCCGAGAGTGGAG  
AGTACATTGTCGGGTGAAGAAGGGCGCCTCGCTCTGGATCCCCAAGGCTCTGCGCTTTGACAGACT  
CGTCGCCGGTCAGATCCCGACTGGCTGGGATCCCAAGCGATATGGTGTCCCCGAGGACATCATCAG  
CCAGGTGGACCCTGTACCCCTGTTCTCTCGTGTCAACTGCCGAAGCTCTCCTGTCTGCTGGTATCA  
CCGACCCCTATGAGTTCTACAAGTACGTTACGTCTCTGAGGTTGGTAACATTGTCGGCTCTGGTATG  
GGCGGTGCTGCGGCCCTTCTGTTGCATGCACAAGGCCCGATTCTCGACAAGCCTCTTCAGAACGAC  
ATCTTGACAGGAGTCTTTCATCAACACCATGGCTGCATGGGTCAACATGTTGCTGCTCTCTTCGTCTGG  
ACCTATCAAGACGCCTGTGCGCGCTTGTGCTACTGCTATTGAGTCTGTGACATTGGTGTGGAGACT  
ATTCTCGAAGGCAAGGCACGTATTTGTCTTGTGCGGTGGTTTTGACGACTTTGGTGAGGAAGGCTCTT  
ATGAGTTCGCCAACATGAAGGCCACCAGCAACAGTGTGGATGAGTTTGCCCATGGCCGTACACCCG  
GTGAAATGTCACGACCTACTACCACTACCCGAAACGGCTTCATGGAGTCTCAGGGATGTGGTGTCCA



GGTCATCATGACTGCCAGCTCGCTCTGGACATGGGTGTCCGATCCACGGTATCCTTGCCTTTACCA  
CCACCGCTTCCGACAAGATTGGACGATCCGTCCCTGCGCCTGGCAAGGGTGTCTCACTTCTGCCCCG  
AGAGCATGCTGGCAAGTTCCCATCGCCGCTGCTTGATATCAACTACCGCCGCGACAGATTGAGCGC  
CGCAAGAAGCTGATCAAGCAGTGGGAGGAGTCTGAGTTGGAGTTCCTGCACGATGAGGTTGATGCT  
ATGAAGGCCAGGGCGGTAAATTTCGACGAGAAGGAGTACGCTCAGGACCGCATGATGCACATCCA  
GAAGGAGGCCGCAAGACAAACAAAGGAGCTCCTCCGAAGCATGGGTAACAACCTTCTGGAAGAGTG  
ACCCAAGCATCGTCTCTCCGAGGTGCCCTTGAACCTGGGGTCTTACCATTGATGATGTCAAAGTT  
GCTTCGTTCCACGGCACATCCACTGGCGCCAACGACAAGAACGAGTCTGCGGCCATCTGCCAGCAGC  
TGCGTCACCTTGGCCGAAGCGAGGGCAATGCCATTATGGGTGTCTTCCAAAAGTTCCTTACTGGTCA  
CCCCAAGGGTGTGCCGGTGTGGATGTTGAACGGCGGCCTGCAGATCCTCAACTCTGGATTGGTC  
CCTGGTAACAGAAACGCCGACAACATTGACCCCATCATGGAGCAATACGACCTGATTGTCTACCCCA  
GCCGTAGCATCCAGACCGACGGAGTCAAGGCTTCTCCCTGACCTCGTTTGGTTTCGACAGAAGGG  
AGCCCAGGCAGTCGGCGTTACCCCAAGTACCTGTTGCTACTCTCGACGAGAAGACTTACGATGCG  
TACCGCGTCAAGGTCGAGGCCCGACAGAAGAAGGCCTACCGTACTTCCACAACGGAATGATTAGC  
AACACCCTGTTTGTCTCCAAGGCCAACGCGCCTTACAGCGATGACCAGCTCAGCGCTGTGCTGCTGA  
ACCCCGATGCTCGTGTGAGCGAGGATAAGAAGACGGCGGAGCTTAAGTATGCCGCCAACTTCATGA  
AGCAGTCTGAGAAGATCACTCCCGGACCAACGTCGAAGGAGACTCAGCAGGTCATCGAAGCGCTCG  
CGACAAGGTGACGAGCAAGAACAGCAACGTCGGCGTTGATGTCGAGGATATTCCATCCTTCAACG  
TTGATAATGACACGTTCAATTGAGCGCAACTTACCACCCAAGAAGTGGCCTACTGCAAGACTGCCCC  
TAGCCCGCAGAGCTCATTTGCTGGCCGATGGAGCGCCAAGGAAGCCGTTTTCAAGGCCCTTGGTGT  
GCCAGCAAGGGAGCTGGCGCTGCCCTGAAGGACATTGAGATTCTCAAGGATGACACTGGCGCGCCT  
GTTGTTACTCTCCATGGTGAAGCCGCCCGCTGCCAAGCAGGCTGGTGTAAAGGAGGTCTCGGTCT  
CCATTTACACGCGGACAAGCAGGCCGTTGCCGTAGCAGTTGCCATTTCTAA

>Trichoderma atroviride

ATGCGTCCTGAAGTTGAGCAAGAGCTCGCCACACGCTCCTCGTTGAGCTTCTAGCATAACCAGTTCCG  
CCTCTCCCGTCAGGTGGATTGAGACTCAGGATGTGTTCCCTGGCAGAGAAGACGGCCGAGCGCATCG  
TCGAAGTCGGTCCCGCAGATACCCTCGGAGTGATGGCTAAGCGCACATTGGCGTCCAAATACGAAG  
CCTACGACGCTGCCAAGTCTGTTGAGCGACAGATTCTCTGCTATAACAAAGACGCCAAGGAGATTTA  
CTACGATGTCGACCCCATTTGAAGAAGAGCCCGAGCCCGCTGCGGCCAGCTCATCAGATGCCCCAG  
CCAGCCTGCTGCGGGCGCCCCGCGGCTGCTGCTCCGGCTGCTGCTGCTGCTCCGGCTCCCTCCTCA  
GGACCTGCAGCCAGGTTCTGATCAGCCAGTGCAGGCTGTGAAATTGTACACACCATTGTTGCAC  
AAAAGCTCAAGAAGTCTCTTAGTGATGTGCCTTTGAGCAAGGCCATCAAGGATCTGGTTGGAGGCA  
AATCTACTCTTCAGAATGAGATTCTCGGTGATCTTGAAAAGAATTCGGCTCAACGCCTGAGAAGCC  
CGAAGATACCCCTCTCGACGAGCTCAGCGTTTCCATGCAGGCCACTTTCGACGGCAACCTGGGCAAG  
CACACACAGTCACTCATCGCCAGATTAATCTCCTCGAAGATGCCTGGTGGTTTCAACATCACAGTAGC  
AAGAAAATACCTGGAAACAAGATGGGGCCTTGGTTCTGGTAGACAAGACGGAGCACTGCTGCTGGC  
TTTGACCATGGAGCCTGCTGCCCGTCTAGGCAACGAAGGCGAGGCTAAGGGCTTCTTGACGGAGT  
TGTCAGAAATATGCCGCCAGTGCCGGTATTAGCCTGACGCTGCTGCGGCTGCTTCTGGTGGCTCCGAA  
GGCGGCTCGGGAGGCATGATGATGGATCCCGCTGCCATTGACGCCCTACCAAGGACCAGCGAGCC  
CTGTTCAAGCAACAGCTTGAGCTCTTGGCCGTTACCTCAAGATCGATCTCAGGTGGGGCGACAAGG  
CGCACATTGAGTCTCAAAAATCAGAAAAGGTCCTGCAGGCCAACTCGATCTGTGGACCGCAGAGC  
ACGGCGACTTCTATGCCTCTGGTATTGAGCCCGTCTTTAGCCATTGAAGGCGAGATCTTACGACTC  
GTCCTGGAACCTGGGCCCGTCAAGATGCGCTCACCATGTACTATGACATTATTTTCCGTAGACTGCAG  
ACTGTCGACCGTGAAATTGTCAGCCAGTGCATCCGCATCATGAACAAGTCAAACCCCAAGCTTCTCG  
AGTTCATGCAGTACCACATCGATAACTGCCCTACTGAGCGCGGTGAAACCTACCAGCTCGCCAAAGA  
ACTTGGCCAGCAGCTCATTGAGAACTGCAAGGAAGTCTGGAGCTGTCTCTGTCTACAAGGACGTT  
GCCGTTCCCACTGGTCTCGCACCACCGTCGATGCCCGTGGCAACCTCAACTACGAGGAAGTTCTCT

GCACCAGCTGCAGAAAACCTCGAGCACTACGTTTCAGCAGATGGCCGAGGGCGGAAAGATCTCCGAGT  
ATGGCAACCGCACCAAGGTTTCAGAACGACCTGCAGCGTATCTACAAGTTGATCAAGCAGCAGCACA  
AGATGTCCAAGACCTCTCAGCTCGAAATCAAGAGCTTGTACGGTGATGTTTTGCGCTCCCTGGCCAT  
GAACGAGAGCCAAATTCTCAAGGAGAACGGCAAGGGCCGAAAGTCGGGCCTGAAGGGCAGCAGC  
CTGAACAAGGGCAGGGTCGAGACCATTCCCTTCTCCATCTCAAGAGAAAGACTTTCACGGCTGG  
GACTACAGCAAGAAGCTCACTGCTGTCTACCTCAACTCTCTCGAGCAGGCTGCCAAGGACGGCGTCA  
CGTTCCAGGACAAGTATGTTTTGATGACTGGTGTCTGGTGCCGGATCCATTGGTGCCGAGGTCCTGCA  
GGGCCTCGTCAGCGGAGGTGCCAAGGTCGTGGTCACTACCAGTCGATTCTCCCGAGAGGTGACTGA  
GTACTATCAGGCCATGTACACCCGTTTTGGCTCTCGTGGATCTCAAATCGTTGTTGTCCCCTTCAACC  
AGGGAAGCAAGCAGGACGTCAAGCTCTCGTCAATTACATCTACGACGCTAAGACTGGTCTTGGCT  
GGGATCTCGACTACATCGTTCCTTTCGCTGCCATCCCTGAGAATGGCCGACAGATTGATAGCATCGA  
CTCCAAGTCTGAGCTGGCCCACCGTATTATGCTGACCAACTTGATCCGCATGCTCGGTTACGTCAAG  
GCTCAAAGGCTGAGCGTGGCTTCGAAACTCGTCCCGCTCAGGTTGTCTTCCCCTGTCTCCCAACCA  
CGGTACCTTTGGTAATGATGGTCTCTACTCCGAATCCAAGCTGGCTCTTGAGACTCTTCAACCGAT  
GGCACTCTGAGGACTGGGGCCACTACCTACAATTTGCGGTGCTGTTATCGGATGGACTCGCGGTAC  
TGGTCTCATGTCTGGCAACAACATTGTCGCTGAGGGTGTGAGGCGTTTGGTGTCCGAACCTTCTCT  
CAGCAAGAGATGGCTTTCAACCTGCTGGGTCTGATGTCCGCTACCATTGTCGATCTCTGCCAGTCAG  
AGCCCGTCTTTGCCGACTTGAACGGTGGTTTGAATTCATCCCCAACCTGAACGAGGCCATGACCAA  
GCTTCGCAAGGATATCATGGAGACCAGTGAATCCGTAGAATCGTTTCTAAGGAGAGCGCTATCGA  
GAACACTATTGTCAACGGAGCCGACTCTGAGGTTCTTTACAAGAAGAAGACCATCGAGCCTCGTGCC  
AACATCAAGTTTGACTTCCCTCATCTGCCCCACTGGAAGACCGAGGTCGCCCTCTAATGACCAGCT  
CAAGGGCATGGTCGACCTGGAGAAGGTAGTCGTCGTCACTGGTTTCGCAGAAGTCGGTCCCTGGGG  
TAACTCTGAACCCGATGGGAGATGGAGGCTCATGGCGAATTCTCTCTCGAAGGTTGCATTGAAATG  
GCCTGGATCATGGGTCTCATCAAGAACCACAATGGTCTCTCAAGGGCAAGCCTTACGCTGGCTGG  
GTTGACGCTAAGACTGGTGAACCCGTCGACGACAAGGACGTCAAGCAGAAGTACGAGAAGTTCATT  
CTGGACCACGCCGGTATCCGTCTGATTGAGCCTGAGCTGTTCAATGGATATGACCCCAACAAGAAGC  
AGCTGCTTACGAGGTTGTCATTGAAGAGGACCTTGAACCATTCGAGGCCTCCAAGGAGACTGCTG  
AAGAGTTCGACGAGAACACGGTGACAAGGTGGAGATTTTCGAGATCCCCGAGTCTGGAGAGTTCA  
CTGTGCGAGTGAAGAAGGGCGCCTCGCTCTGGATCCCCAAGGCTCTGCGCTTCGACAGACTCGTCG  
CTGGCCAGATCCCAACTGGCTGGGACCCCAAGCGATATGGTATCCCCGACGATATTGTCAGCCAAGT  
GGACCCTGTCACCTTGTCTTCTCGTGTCAACTGCTGAGGCTCTTGTCTCTGGTATTACCGATCC  
ATACGAGTTCTACAAGTACGTCCACGTCTCTGAAGTTGGTAACATTGTCGGCTCTGGTATGGGTGGT  
GCTACGGCCCTGCGTGGCATGCACAAGGCCAGATTCCAAGACAAGCCTCTTCAAGACGATATCCTGC  
AGGAATCCTTCATCAACACTATGCCTGCTTGGGTGAACATGTTGCTGCTCTTTCGTCTGGACCTATC  
AAGACCCCGGTTCGAGCTTGTGCCACCGCTATTGAGTCTGTGACATAGGTGTGGAGACCATTCTG  
GAAGGCAAGGCTCGCATCTGTCTTGTGGTGGTCTCGACGACTTTGGTGAGGAGGGCTCTTACGAG  
TTCGCCAACATGAAGGCCACCAGCAACTCAGTAGATGAGTTTGGCCATGGCCGTAATCCTGGCGAAA  
TGTCACGTCCTACGACCACGACCCGAAACGGCTTTATGGAGTCTCAGGGATGTGGTGTCCAGGTCAT  
CATGACAGCCAGGCTTGTCTTGGATATGGGAGTCCCTATCCACGGTATCCTTGTACACCACCACTG  
CCTCTGACAAGATCGGACGTTCCGTCCCTGCTCCTGGCAAGGGTGTCTCACGTCTGCGCGTGAGCA  
CGCTGGCAAGTATCCTTACCACCTGCTTACATCAACTACCGTCGCCGACAGATTGAGCGCCGCAAG  
AAGACGATTAAGCAGTGGGAAGAGTCTGAGCTGGAGTCTTGCACGATGAAATCGATGCTATGAAG  
GCTCAGGGTGGTGTCTTTGACGAGAAGGAGTATGCTCAGGATCGCGTCGCACACATCCGGAGGGA  
GGCCGAGAGACAAGAAAAGGAGCTCCTCCGAAGCATGGGCAACAACCTTCTGGAAGAGCGATCCCT  
CCATTGCTCCCCTCCGTGGTGTCTTGTCAACATGGGGCCTTACCATTGACGACCTGAGGGTTGCCTCT  
TTCCACGGTACATCCACCGGTGCCAACGACAAGAACGAGTCTCTGCCGTTTGGCAGCAGCTGCGTC  
ACCTTGGCCGAAGCAAGGGTAACGCCGTCTGGGTGTCTTCCAGAAGTTCCTGACAGGTCACCCCAA

GGGTGCTGCCGGTGCTTGGATGTTGAACGGTGGTCTGCAAATCCTGAACACGGGTCTGGTCCCTGG  
TAACAGAAATGCCGACAACATCGACCCCATCATGGAGGACTACGATCTGATTGTTTACCCCAGCCGT  
AGCATCCAGACTGATGGAGTCAAGGCTTTCTCTCACCTCGTTTCGGTTTCGGACAGAAGGGAGCCC  
AGGCAGTCGGTGTCCACCCAGATACTTGTTCGCGTTCTCGACGAAAAGACATAACCAGCAGTACTG  
CGCCAAGGTTGAGGCCCGACAGAAGAAGGCTTACCGTTTCTCCACAACGGCATGATCAGCAACT  
CTGTTTCGTTCCCAAGGCTCACGCTCCTTACACCGATGAGCAGCTCAGCGAGGTTCTGATGAACCCTG  
ATGCTCGTGTACCGAAGACAAGAAGACCAAGGAGCTCAAGTATGCCGACAACCTCATGAAGGCGT  
CCGAAAAGGTTGTCCCTGCTGTCACTGTCAAGGAGACACAGCAGATCATTGAGGCGCTCGCTCACAA  
GGTGACAAGCAAGAGCAGCAACGTTGGCGTAGATGTCGAGGATATCTCTGCCATCAACATTGAGAA  
TGACACTTTTATCGAGCGCAACTTCACTAGCCAGGAGATTGCTTACTGCAAGAGTTCTGCTAGCCCC  
AGAGCTCTTTTCGCTGGCCGATGGAGCGCAAGGAGGCAGTCTTCAAGTCTCTTGGCGTCGCCAGCA  
AGGGAGCCGGCGCTGCCCTGAAGGATATTGAGATCCTCAAGGATGACTCTGGCGCCCCACTGTTA  
CTCTTCATGGCGATGCAGCTGCTGCTGCCAAACAGGCTGGCGTGAAGGAGGTTCCGTCTCCATCTC  
ACATGCTGACAAGCAGGCTGTTGCCGTGGCTGTGGCTCACTTCTAA

>Trichoderma sp. T154

ATGCGTCCCGAAGTCGAGCAAGAGCTCGCCACACGCTCCTCGTCGAGCTTCTGGCATAACAGTTCCG  
CCTCTCCCGTGAGGTGGATTGAGACCCAGGATGTCTTCTGGCAGAGAGAACAGCCGAGCGCATCG  
TCGAAGTCGGCCCCGAGATAACCTTGGAGTCATGGCAAAGCGCACACTGGCATCCAAGTATGAAG  
CCTACGACGCCGCAAGTCGGTTCAGCGACAGATCCTCTGCTACAACAAAGACGCCAAGGAGATCT  
ACTATGATGTAGACCCCGTTGAGGAAGAGCCCGAGCCTGTTGCCAGCTCATCCGCTGCTCCTTCAAG  
TCAACCCGCTGCTGCCAGCGCTCCTGCGGCTGCTGCGCCAGTTGCTGCCGCTCCCGCTGCCGGCGCT  
GGACCTGCAGCTCAGGTTCCCGATGTGCCTGTCCAGGCTGTCGAGATTGTGCATACCTTGGTTGCAC  
AGAAGCTCAAGAAGTCTCTAGCTGATGTGCCTTTAGCAAGGCCATCAAGGATCTGGTTGGAGGCA  
AATCCACTCTCCAAAATGAGATTCTCGGTGATCTTGAAAAGAATTTCGGCTCAACGCCTGAGAAGCC  
CGAAGATACGCCTCTCGACGAGCTCGCCGCCTCTATGCAGGCTACCTTCGATGGCAACCTTGGCAAG  
CACACAGTATCCCTCATCGCCAGGCTCATCTCCTCCAAGATGCCTGGTGGCTTCAACATCACAGTGGC  
CAGGAAATATCTGGAACAAGATGGGGTCTCGGCCCGGCAGGCAAGACGGAGCATTGCTGCTGG  
CCTTGACCATGGAGCCTGCTGCCCGTCTAGGAAACGACGGTGAAGGCCAAGGGATTCTCGACGGAA  
TCGTCCAGAAATACGCCGCGAGCGCCGGTATCAGCTTGACATCTGCAGCTGCTTCTGGTGGCTCTGA  
AGGAGGTGCGGGAGGCATGATGATGGATCCCGCCGCCATTGATGCTCTACCAAGGACCAGCGCG  
CCCTGTTCAAGCAGCAGTTGGAGCTCTTGGCCGATACTCAAGATGGACCTCCGGGCCGCGACAA  
GGCACACATTGACTCTCAGAAATCAGAAAAGGTCCTCCAAGCTCAGCTGGATCTGTGGACTGCCGA  
GCACGGCGACTTCTACGCTTCTGGCATCGAGCCTGTCTTTAGCCCGCTGAAGGCTAGATCTTACGAC  
TCTTCTTGGAACTGGGCTCGTCAGGATGCGCTCACCATGTTCTACGACATTATCTTGGCAGGCTCAA  
GACCGTGCACCGTGA AATTGTAGCCAGTGCATTCGCATCATGAACAAGTCAAATCCCAAGCTCCTC  
GAGTTTATGCAGTACCACATCGACAACCTGACCTACTGAGCGCGGTGAGACTTACCAGCTGGCCAAG  
GAGCTTGGTCAGCAGCTCATTGAGAATTGCAAGGACGTTCTGAACCTTTCTCCCGTCTACAAGGACG  
TTGCTGTCCCACTGGTCTCGCACCCTGTGGACGCTCGTGGCAACCTCAACTACGAAGAGGTTCC  
CCGCGCCAGCTGCAGGAAGCTCGAGCACTACGTTTACGAGATGGCTGAGGGTGGAAAGATTTCCGA  
GTATGGCAACCGCACCAAGGTGCAAACGACCTGCAGCGTATCTACAAGTTGATCAAGCAGCAGCA  
CAAGATTTCAAGACTTCTCAGCTCGAGATCAAGAGCCTTACGGAGATGTCCTGCGCTCTCTGGCC  
ATGAATGAGAGCCAGATCCTCCCAAGGAGAATGGCAAGGGCCGAAAGCCGGGCTCAAGGGCAC  
AAACCCCAACAAGGGCCGAGTCGAGACCATCCCCTTCTCCACCTCAAGAGAAAGACCCTGCACGGC  
TGGGACTACAGCAAGAAGCTCACTGCTGTCTACCTCAACTGTCTTGGAGAGGCCGCCAAGGATGGT  
GTCACCTTCCAGGACAAGTATGTCCTGATGACTGGTGTGGTGGCGGTTCCATTGGTGGCGAGGTTCC  
TGCAGGGCCTCATCAGCGGAGGTGCCAAGGTTGTGGTTACCACTAGCCGATTCTCTCGACAGGTAA  
CCGAATACTATCAGTCCATGTACAGCCGCTTGGCTCTCGCGGATCGCAAATCGTCGTCGTTCCCTTC

AACCAGGGAAGCAAGCAGGATGTGGAGGCCCTCGTCAACTACATCTACGACGCCAAGACCGGTCTC  
GGCTGGGATCTCGACTTCATCGTTCCCTTCGCTGCCATCCCTGAGAACGGCCGACAGATTGATAGCA  
TCGATTCCAAGTCGGAGCTGGCTCACCGTATTATGCTCACCAACTTGATCCGCATGCTTGGCTGCGTC  
AAGACTCAAAGGCTGAGCGTGGCTTCGAGACCCGTCGCCAGGTCGTCCTCCCTCTGTCCCCCA  
ACCATGGTACCTTCGGTAACGATGGTCTCTACTCCGAGTCCAAGCTGGCTCTTGGACCCCTCTCAAC  
CGATGGCACTCCGAGGACTGGGGCCACTACCTACCATTGCGGTGCTGTTATCGGATGGACTCGTG  
GTACTGGTCTCATGTCTGGCAACAACGTTGTTGCTGAGGGTGTGGAGGCGTTCGGCGTGCGAACCT  
TCTCCCAGCAAGAGATGGCCTTCAACCTGTTGGGCTGATGTCAGCTACTATTGTTGATCTCTGCCAG  
TCAGAGCCCGTCTTTGCCGACTTGAACGGTGGCCTCCAATTCATCCCCAACCTGAACGAGTCCATGA  
CCAAGCTCCGCAAGGATATCATGGAGACTAGCGAAATCCGCAGAGCCGTTTCCAAGGAGAGCGCTA  
TCGAGAACACCATTGTCAACGGAGCCGACTCCGAGGTTCTTTACAAGAAGAAGACCATCGAGCCCC  
GTGCCAACATCAAGTGTGACTTCCCTCACCTGCCTGACTGGAAGACGGAGGTGGCCCCTCTCAACGA  
CCAGCTGAAGGGCATGGTTCGACTTGGAGAAGGTCATTGTGCTGACCGGTTTTGCTGAAGTTGGTCC  
CTGGGGTAACTCTCGAACTCGATGGGAGATGGAGGCCTACGGCGAGTTTTCGCTCGAAGGCTGCAT  
CGAAATGGCCTGGATCATGGGCCTCATCAAGAACCACAACGGTCCCCTCAAGGGCAAGCCCTACGC  
TGGCTGGGTTGACGCCAAAACGGCGAGCCCGTCGATGACAAGGATGTCAAGCAGAAGTACGAGA  
AACACATTCTGGAGCACTCTGGTATTGTTTTGATCGAGCCCGAGCTGTTTCGACGGATATGACCCCAA  
CAAGAAGCAGCTGCTCCACGAGGTCGTCATTCAAGAGGATCTGGAGCCTTTTGGAGGCTTCAAGGA  
GACTGCAGAGGAATTCGACGCGAGCACGGTGACAAGGTGGAGATTTTCGAGATCCCCGAGAGTG  
GAGAGTACATTGTCCGGGTGAAGAAGGGCGCCTCTCTCTGGATCCCCAAGGCTCTGCGCTTTGACA  
GACTCGTCGCCGTCAGATCCCCACTGGCTGGGATCCCAAGCGATATGGTGTCCCCGAGGACATCA  
TCAGCCAGGTGGACCCTGTACCCTGTTCTCTCGTGTGACTGCCGAGGCTCTCCTGTGCTCCGGT  
ATCACCGACCCCTATGAGTTCTACAAGTACGTTACGTCTCTGAGGTTGGTAACATTGTCGGCTCTGG  
TATGGGTGGTGTGCGGCCCTTCGTGGCATGCACAAGGCCGATTCCCTCGACAAGCCTCTCAGAAC  
GACATCTTGCAGGAGTCTTTCATCAACACCATGGCTGCGTGGGTCAACATGTTGCTGCTCTCTTCGTC  
TGGACCTATCAAGACACCTGTCGGTGTGTTGCTACTGCTATTGAGTCTGTGACATTGGTGTGGAG  
ACTATTCTCGAAGGCAAGGCACGTATCTGTCTTGTGCGTGGTTTTGACGACTTTTGGTGAAGGCT  
CTTATGAGTTCGCCAACATGAAGGCCACCAGCAACAGTGTGGATGAGTTTGCCATGGCCGTACGCC  
CGGTGAAATGTCACGACCTACTACCACTACCCGAAACGGTTTTCATGGAGTCTCAGGGATGTGGTGTG  
CAGGTCATCATGACTGCCAGCTCGCTCTGGACATGGGTGTCCGATCCACGGTATCCTTGCCTTAC  
CACCACCGCTTCCGACAAGATTGGACGATCCGTCCCTGCGCCTGGCAAGGGTGTCTCACTTCTGCC  
CGAGAGCATGCTGGCAAGTTCCCATCGCCGCTGTTGATATCAACTACCGCCGCCGACAGATTGAGC  
GCCGCAAGAAGCTGATCAAGCAGTGGGAGGAGTCTGAGTTGGAGTTCCTGCACGATGAGGTTGAT  
GCCATGAAGGCCAGGGCGGTAAATTCGACGAGAAGGAGTACGCCAGGACCGCATGTTGCACAT  
CCAGAAGGAGGCCGCAAGACAAACAAAGGAGCTCCTCCGAAGCATGGGTAACAACCTTCTGGAAGA  
GTGACCCAAGCATCGCTCCTCTCCGAGGTGCCCTTGCAACCTGGGGTCTTACCATTGATGATGTCAA  
GGTGGCCTCGTTCACGGCACATCCACTGGCGCCAACGACAAGAACGAGTCTGCGGCCATCTGCCA  
GCAGCTGCGTCACCTTGGCCGAAGCGAGGGCAATGCCATCATGGGTGTCTTCCAAAAGTTCCTTACT  
GGTACCCCAAGGGTGTGCCGGTGTGGATGTTGAACGGTGGCCTGCAAATCCTCAACTCCGGA  
TTGGTCCCCGGTAACAGAAATGCCGACAACATTGACCCCATCATGGAGCAATACGACCTGATTGTCT  
ACCCAGCCGTAGCATCCAGACTGACGGAGTCAAGGCCTTCTCCCTGACCTCCTTCGGTTTTCGGACA  
GAAGGGAGCCCAGGCAGTCCGGCTTACCCCAAGTACCTGTTTGTACCCTCGACGAGAAGACTTA  
CGATGCGTACCGCGTCAAGGTGAGGCCCCGACAGAAGAAGGCCTACCGCTACTTCCACAATGGAAT  
GATCAGCAACACCCTGTTTGTCTCAAGGCCAACGCGCCTTACAGCGATGACCAGCTCAGCGCTGTG  
CTGCTGAACCCTGATGCTCGTGTGAGCGAGGATAAGAAGACGTGCGGAGCTTAAGTATGCCGCCAAC  
TTCATGAAGCAGTCTGAGAAGATCACTCCCGCGTACCCTCAAGGAGACGCAGCAGGTCATCGAG  
GCGCTCGCCACAAGGTCACGAGCAAGAACAGCAACGTGGTGTGATGTCGAGGATATCCATCC

TTCAACATTGACAATGACACGTTTCATTGAGCGCAACTTCACCACCCAAGAGGTGGCCTACTGCAAGA  
CTGCCCCTAGCCCGCAGAGCTCATTTGCTGGCCGATGGAGTGCCAAGGAGGCCGTGTTCAAGGCTC  
TTGGTGTTGCCAGTAAGGGAGCTGGCGCTGCCTTGAAGGACATTGAGATTCTCAAGGACGACTG  
GCGCGCTATTGTTACTCTCCATGGTGAAGCCGCTGCTGCTGCCAAGCAAGCTGGTGTCAAGGAGGT  
CTCTGTCTCCATTTACACGCCGACAAGCAGGCGGTTGCCGTAGCTGTTGCCATTTCTAA

>Trichoderma citrinoviride

ATGCGTCCCGAAGTCGAGCAGGAGCTCGCCACACGCTCCTCGTCGAGCTGCTGGCATAACCAATTTG  
CCTCTCCCGTGAGGTGGATTGAGACCCAGGATGTCTTCTGGCAGAGAGAAACGCCGAGCGCATCG  
TCGAAATCGGCCCGCAGACACCCTTGGGGTCATGGCCAAGCGCACACTGGCCTCCAAGTACGAGG  
CCTACGATGCCGCAAAGTCGGTCCAGCGACAGATCCTCTGCTACAACAAGGATGCCAAGGAGATTT  
ACTACGATGTCGACCCTGTGGAAGAAGAACCCGAACCCGCGGCGAGCTCATCGGCTGCCCCGCTG  
CACCAGCCGCTGCCGGTGCTCCTGCGGCTGCTGCCCAAGTTGCTGCTGCTCCGGCTCCAGCGCCGG  
GCCTGCAGCCCAGGTTCCCGATCAGCCTGTGCAGGCCGTCGACATTGTGCACACCCTGGTTGCGCAA  
AAGCTCAAGAAGTCTCTGACTGAGGTGCCTCTGAGCAAGGCCATCAAGGATCTGGTTGGAGGCAAA  
TCCACCCTTCAGAATGAAATCCTCGGTGATCTTGGAAGGAATTCGGTACAACGCCTGAGAAACCCG  
AAGATACGCCTCTCGACGAGCTCAGCGCTTCCATGCAGGCTACCTTCGATGGCAACCTTGGCAAGCA  
CACACAGTCCCTCATCGCCAGGTTTCATCTCCTTAAGATGCCTGGTGGCTTCAACATCACCGTGGCAA  
GGAAATACCTGGAATCAAGATGGGGCCTCGGTCCCGGCAGACAAGACGGAGTACTGCTGCTGGCCT  
TGACCATGGAGCCTCCTGCTCGTCTTGAAACGATGGTGACGCCAAGGCATACCTCGACGGAGTTG  
CCCAGAAATACGCCGCAATGCTGGCATCAGCTTGACGACTGCGGCCGCTTCTGGTGGCTCCGACG  
GGGGTGCGGGAGGCATGATGATGGATCCCGCTGCCATTGACGCTCTACCAAGGACCAGCGCGCTC  
TGTTCAAGCAGCAGCTGGAGCTCTTTGCTAGATACTCAAGATGGACCTCAGAGCCGGCGACAAGG  
CGCACATCGAGTCTCAAAGTCAGAAAAGGTCCTTCAGGCCAGCTGGATCTGTGGACTGCAGAGC  
ACGGTGATTTCTACGCTTCCGGCATTGAGCCTGTCTTCAGCGCATTGAAGGCTAGATCTTACGACTCC  
TCCTGGAACCTGGGCTCGTCAAGATGCGCTCTCCATGTACTACGACATCATCTTTGGCCGACTCAAGA  
CGGTGACCCGTGAGATTGTCAGCCAGTGCATTCGCATCATGAACAAGTCCAACCCCAAGCTCCTCGA  
GTTTCATGCAGTACCACATCGACAACCTGCCCTACCGAGCGCGGCGAGACCTACCAGCTTGCCAAGGA  
GCTCGGACAGCAGCTCATTGAGAACTGCAAGGAGGTTCTGAACCTGCCTCCTGCTTACAAGGACGTG  
GCTGTCCCACTGGTCTCGCACCACCGTGGACGCCCGCGGCAACCTCAACTACGAGGAAGTTCCCC  
GCGCCAGCTGCCGGAAGCTCGAGCACTACGTTACGAGATGGCCGAGGGTGGCAAGATCTCCGAG  
TATGGCAACCGCACCAAGGTGCAGAACGACCTGCAGCGTATCTACAAGTTGATCAAGCAGCAGCAC  
AAGATGTCCAAGACTTCTCAGCTCGAGATCAAGAGCCTGTACGGCGATGTTCTGCGCTCCCTGGCCA  
TGAACGAGAGCCAGATCATCCCCAAGGAGAACGGCAAGGGCAGGAAGCCAGGCTTCAAGGGCTCA  
AGCCCGAACAAGGGCAGAGTCGAGACGATCCCTTCTCCACCTCAAGCGCAAGTCCCTGCATGGCT  
GGGACTACAGCAAGAAGCTCACGGCCGTCTACCTCAACTGCCTTGAGGAGGCTGCCAAGGACGGTG  
TCAGTTCCAGGACAAGTATGTCTGATGACGGGTGCCGGTGCCGGTCCATTGGTGCCGAGGTCTC  
GCAGGGCCTCATCAGCGGAGGTGCAAAGGTTGTGGTACCACGAGTCGGTTCTCTCGACAGGTAC  
CGAGTACTACCAGTCCATGTACGCACGCTTGGTTCCCGCGGCTCTCAGATTGTCGTGGTGCCCTTCA  
ACCAGGGAAGCAAGCAGGATGTGGAGGCCCTCGTCAACTACATCTACGACACCAAGAACGGTCTTG  
GCTGGGATCTCGACTACATCGTCCCCTCGCCGCCATTCCCGAGAACGGCCGACAGATTGACAACAT  
CGACTCCAAGTCGGAGCTTGTACCCGCATCATGCTGACCAACCTGATCCGCATGCTCGGCTGCGTC  
AAGACGCAAAAGGCTGAGCGCGGCTTCGAGACCCGTCCCGCCAGGTCGTCCTCCCTCTGTCTCCA  
ACCACGGCACCTTTGGTAACGATGGTCTCTACTCCGAGTCCAAGCTGGCTCTCGAGACCCTCTTCAAC  
CGATGGCACTCCGAGGACTGGGGCCACTACCTACCATCTGCGGTGCTGTATCGGCTGGACTCGTG  
GCACTGGTCTCATGTCTGGCAACAACGTGGTGCAGAGGGCGTCGAGGCCCTTTGGCGTGCGAACCT  
TTTCCCAGCAAGAGATGGCCTTCAACCTTCTGGGCTGATGTCAGCTACCATCGTTGATCTCTGCCAG  
TCCGAGCCCGTCTTTGCCGACTTGAACGGCGGTCTGCAGTTCATCCCCAAGTGAACGAATCCATGA

CCAAGCTTCGCAAGGACATCATGGAGACGAGCGAGATCCGCAGAGCCGTCTCCAAGGAGAGCGCC  
ATCGAGAACACCATTGTCAACGGAGCCGACTCCGAGGTTCTTTACAAGAAGAAGACCATCGAGCCC  
CGTGCCAACATCAAGTGCGACTTCCCCCGCCTTCCCAGCTGGAAGACGGAGGTGGCTCCTCTCAATG  
AGCAGCTCAAGGGCATGGTTCGACTTGGACAAGGTCGTCTGTCGTGACCCGGTTTTGCCGAAGTCGGCC  
CCTGGGGTAACTCCCGAACCCGATGGGAGATGGAGGCCTATGGCGAGTTTTGCTCGAGGGCTGCA  
TCGAGATGGCCTGGATCATGGGCCTCATCAAGAACCACAACGGTCCCCTCAAGGGCAAGCCCTACG  
CCGGCTGGGTGGATGCCAAGACTGGCGAGCCCGTCGATGACAAGGATGTCAAGCAAAGTACGAG  
AAGCACATCTTGGAGCACTCCGGTATCCGCCTGATCGAGCCGAGCTCTTCGACGGATACGACCCCA  
ACAAGAAGCAGCTGCTCCACGAGGTCGTCAATCAGGAGGACCTTGAGCCGTTTGAGGCTTCCAAGG  
AGACGGCCGAGGAGTTCCAGCGCGAGCACGGTGACAAGGTCGAGATCTTTGAGATCCCCGAGAGT  
GGAGAGTACATTATCCGGGTGAAAAAGGGCGCCTCGCTCTGGATCCCCAAGGCTCTGCGCTTTGAC  
AGACTGGTCTGCTGGTACAGATCCCGACCCGGCTGGGACCCCAAGCGATATGGTGTCCCGAAGACATC  
ATCAGCCAGGTGGACCCCGTCACCCTGTTCCCTCCTCGTGTGCGGTTGCCGAAGCTCTGTTGTCTGTG  
TATCACCGACCCGTACGAGTTCTACAAGTACGTTACGTCCTCGAGGTCGGTAACATTGTCTGGCTCC  
GGTATGGGTGGTGCCAAGGCTCTGCGCGGCATGCACAAGGCGCGATTCTCGACAAGCCCTCCAG  
AACGACATCCTGCAGGAGTCGTTCAACACCATGTCTGCCTGGGTCAACATGCTGCTGCTCTCCTC  
GTCCGGTCCCATCAAGACTCCTGTGCGGTGCTTGCCTACCGCTATCGAGTCTGTTGACATTGGTGTG  
GAGACGATTCTGGAAGGCAAGGCCCGCATCTGTCTGGTGGTGGCTTTGACGACTTTGGTGAGGAG  
GGTTCATATGAGTTTGCCAACATGAAGGCCACCAGCAACAGCTTGGATGAGTTGCCACGGCCGTA  
CCCCGCGGAGATGTCACGTCCCACGACCACCACGCGAAACGGCTTCATGGAGTCTCAGGGATGCG  
GTGTCCAGGTCATCATGACTGCTCAGCTGGCCCTGGATATGGGAGTCCCATCCACGGTATCCTTGC  
CTTTACCACCACCGCCTCCGACAAGATCGGACGATCCGTCCCTGCTCCTGGTCTAGGGTGTCTCACCT  
CCGCGCGAGAGCATCCCGGCAAGTTCCCGTCGCCCTGCTTGACATCAACTACCGTCGCAGGCAGAT  
TGAGCGTCGCAAGAAGCAGATCAAGCAGTGGGAAGAGTCCGAGTTGGAGTTCCTTCATGATGAGAT  
TGAGGCCATGAAGGCCAGGGCGGTGTCTTTGACGAGAAGGAGTACGCCAGGAGCGCATCCTGC  
ACATCCAGAAGGAGGCCGTCCGACAAGAAAAGGAGCTCCTCCGAAGCATGGGCAACAACCTTCTGGA  
AGAACGACCCAGCATCGCTCCTCTCCGCGGAGCCCTTGCCACATGGGGCCTCACCATCGACGACCT  
GAAGGTGGCCTCGTTCCACGGCACGTCCACGGGCGCCAACGACAAGAACGAGTCGTGCGCCATCTG  
CCAGCAGCTGCGCCACCTTGGCCGAAGCAAGGGCAACGCCATCCTCGGTGTCTTCCAGAAGTACCTT  
ACCGGCCACCCCAAGGGTGTCTGCTGGTGTGGATGATGAACGGTGGTCTGCAGATCCTCAACACC  
GGCCTGGTCCCTGGCAACCGGAATGCCGACAACATTGACCCCATCATGGAGAACTACGACCTGATTG  
TCTACCCAGCCGACGATCCAGACCGACGGTGTCAAGGCCTTCTCGCTCACCTCGTTCCGTTTCGGC  
CAGAAGGGAGCCAGGCCGTGCGCGTTCACCCCAAGTACCTGTTCCGCCACCCTGGACGAGAAGACG  
TACGACGCGTACCGTGCCAAGGTTGAGTCCCGACAGAAGAAGGCTTACCGCTTCTTCCACAACGGCA  
TGATCAACAACGCCCTGTTTGTCTCCAAGGCCAACCCGCTTACACCGACGACCAGCTCAGCGCGGT  
TCTGATGAACCCCGATGCTCGTGTGGCCGAGGACAAGAAGACGGCAGAGCTCAAGTTCCCGCCCAA  
CTTCATGAAGGCGTCCGAGAAGACTGTCTCTCCGACCGTCGCCAAGGAGACGCAGCAGGTGATTGA  
GGCGCTCGCGACAAGGTGGCGGGCAAGAACAGCAACGTGGGCGTGGATGTCGAGGACATTGCCG  
CCATCAACATCGACAACGACACGTTCAATTGAGCGCAACTTTACCCCCAGGAGGTTGCCTACTGCAA  
GAGCGCTCCTAGCCCGCAGAGCTCGTTTGCCGGCCGGTGGAGCGCAAAGGAGGCCGTGTTCAAGG  
CACTTGGTGTGCGCAGCAAGGGAGCTGGCGCTGCCCTCAAGGACATTGAGATCCTCAAGGACGACA  
CTGGCGCACCCGTTGTTTCTTTCATGGTACGCTGCTGCTGCTGCTAAGCAAGCCGGCGTGAAGGA  
GGTCTCCGTCTCCATCTCGCATGCTGACAAGCAGGCCGTTGCCGTGGCCGTTGCCACTTCTAA

>Trichoderma gamsii

ATGCGTCTGAAGTTGAGCAAGAGCTCGCCACACGCTCCTCGTTGAGCTTCTAGCATAACAGTTCCG  
CCTCTCCCGTCAGGTGGATTGAGACTCAGGATGTGTTCCCTGGCAGAGAAAACGGCCGAGCGCATCG  
TCGAAGTTGGTCCCGCAGATACCCTCGGAGTGATGGCCAAGCGCACATTGGCGTCCAAATACGAAG

CCTACGACGCTGCCAAGTCTGTTCAGCGACAGATCCTCTGCTACAACAAAGACGCCAAAGAGATTTA  
CTACGATGTCGACCCCATTGAAGAAGAGCCCGAGCCCGCTGCGGCCAGCTCATCAGATGCCCCAG  
CCAGCCTGCTGCGGGCGCCCCGCGGCTGCTGCTCCGGCTGCTGCTGCCCCAGCTCCCTCCTCAGGG  
CCTGCAGCTCAGGTTCTGATCAGCCAGTGCAGGCTGTGCACATTGTACACACCCATCGTTGCGCAA  
AGCTCAAAAAGTCTCTTAGTGATGTGCCTCTGAGCAAGGCCATCAAGGATCTGGTTGGAGGCAAAT  
CCACTATGCAGAATGAGATTCTCGGTGATCTTGGCAAGGAATTCGGCTCAACGCCTGAGAAGCCCG  
AAGATACCCCTCTCGACGAGCTCAGCGCTTCATGCAGGCCACCTTCGACGGCAACCTGGGCAAGCA  
CACACAGTCACTCATCGCCAGATTGATCTCCTCGAAGATGCCTGGTGGCTTCAATATCACAGTAGCA  
AGAAAATACCTGGAAACAAGATGGGGCCTTGGTTCTGGTAGACAAGACGGAGCACTGCTGTTGGCT  
TTGACCATGGAGCCTGCTGCTCGTCTAGGCAACGAAGGCGAGGCTAAGGGTTTCTTGACGGAGTT  
GTCCAGAAATATGCCGCCAGTGCCGGTATCAGCCTGACATCCACGGCAGCTTCTGGTGGTTCCGAAG  
GCGGCTCGGGAGGCATGATGATGGATCCCGCTGCCATTGACGCCCTCACCAAGGACCAGCGAGCGC  
TGTTCAAGCAGCAGCTCGAGCTCTTTGCCGATACCTCAAGATCGACCTCAGGTCGGGCGACAAGGC  
GCACATTGAGTCTCAAAAATCAGAAAAGTCTTCAGGCCAGCTCGACCTGTGGACCGCAGAGCA  
CGGCGACTTTTATGCCTCTGGTATTGAGCCCGTCTTCAGCCCATTGAAGGCGAGATCTTACGACTCGT  
CCTGGAATTGGGCTCGTCAAGATGCGCTCACCATGTAATGACATTATTTTCGGTAGACTGCAGAC  
TGTCGACCGTGAAATTGTCAGCCAGTGCATCCGCATCATGAACAAGTCAAACCCCAAGCTCCTCGAG  
TTCATGCAGTACCACATCGATAACTGCCCCACTGAGCGCGGTGAAACCTACCAGCTCGCCAAGGAAC  
TTGGCCAGCAGCTCATTGAGAACTGCAAGGAAGTATTGGAGCTGTCTCCTGTCTACAAGGACGTTGC  
CGTCCACAGGTCCTCGCACCACCGTGGATGCGCGTGGTAACCTCAACTATGAGGAAGTTCCTCGC  
GCCAGCTGCAGAAACTCGAGCACTACGTTAGCAGATGGCCGAGGGCGGAAAGATCTCCGAGTAT  
GGCAACCGCACCAAGGTTGAGAACGACCTGCAGCGTATCTACAAGTTGATCAAGCAGCAACACAAG  
ATGTCCAAGACCTCTCAGCTCGAAATCAAGAGCTTGTACGGTATGTTTTGCGCTCCCTGGCCATGA  
ACGAGAGCCAGATTCTCAAGGAGAACGGCAAGGGCCGAAAGCCGACCCTGAAGGGCACCAACCTG  
AACAAGGGCAGGGTCGAGACCATTCCCTTCTCCATCTCAAGAGAAAGACACTTCACGGCTGGGACT  
ACAGCAAGAAGCTCACTGCTGTCTACCTCAACTCTCTCGAGCAGGCTGCCAAGGACGGCGTACGTT  
CCAAGACAAGTATGTTTTGATGACTGGTGTGGTGCCGGATCCATTGGTGCCGAGGTTCTGCAGGG  
CCTCGTCAGCGGAGGTGCCAAGGTTGTGGTCACTACCAGTCGATTCTCCCGAGAGGTCAGTACTGAGTAC  
TATCAGTCCATGTACACCCGTTTTGGCTCTCGCGGATCTCAAATCGTTGTTGTCCCCTTCAACCAGGG  
AAGCAAGCAGGACGTGGAAGCCCTCGTCAATTACATCTACGACGCTAAGACTGGTCTTGGCTGGGA  
TCTCGACTACATCGTTCCCTTCGCTGCCATCCCTGAGAATGGCCGACAGATTGATAGCATCGACTCCA  
AGTCTGAGCTGGCCACCGTATTATGCTGACCAACTTGATCCGCATGCTTGGTTACGTCAAGGCTCA  
GAAGGCTGAGCGAGGCTTCGAAACTCGTCCCGCTCAAGTTGTCTTCCCCTTTCTCCAACCACGGTA  
CCTTTGGCAACGACGGTCTCTACTCCGAATCTAAGCTGGCTCTTGAGACTCTTCAACCGATGGCAC  
TCCGAAGACTGGGGCCACTACCTACAATTTGCGGTGCTGTTATTGGATGGACTCGCGGTACTGGTC  
TCATGTCTGGCAACAACATTGTTGCCGAGGGTGTGAGGGGTTTGGTGTCCGAACCTTTCTCTCAGCA  
AGAGATGGCTTTCAACCTCCTGGGTCTGATGTCCGCTACCATTGTCGACCTCTGCCAGTCAGAGCCT  
GTCTTTGCCGACTTGAACGGTGGTTTGAATTCATCCCCAACCTGAACGAGGCCATGACCAAGCTTC  
GCAAGGATATCATGGAACCAAGTGAAGTCCGTAGAATCGTTTCTAAGGAGAGCGCTATCGAGAACA  
CTATTGTCAACGGAGCCGACTCTGAGGTTCTTTACAAGAAGAAGACCATCGAGCCTCGTGCCAACAT  
CAAGTTTGACTTCCCTCATCTTCCCGACTGGAAGACCGAGGTGCCCCCTTTAATGACCAGCTCAAGG  
GCATGGTTCGACCTGGAGAAGGTAGTCGTTGTACCCGTTTCGAGAAGTCGGTCTTGGGGTAACT  
CTCGAACCCGATGGGAGATGGAGGCTCATGGCGAATTCTCTCTCGAAGGCTGCATTGAAATGGCCT  
GGATTATGGGTCTCATCAAGAACCACAATGGTCTCTCAAGGGCAAGCCTTACGCTGGCTGGGTTGA  
CGCTAAGACTGGTGAGCCCGTCGACGACAAGGACGTCAAGCAAAAGTACGAGAAGTTCATTCTGGA  
CCACGCCGGTATCCGTCTGATTGAGCCTGAGCTGTTTGTGATGGATATGACCCCAACAAGAAGCAGCTG  
CTTACGAGGTTGTCATTGAAGAGGACCTTGAGCCATTTCGAGGCCTCAAGGAGACTGCCGAAGAG

TTCCGACGAGAACACGGTGACAAGGTGGAGATTTTCGAGATCCCCGAGTCTGGAGAGTTCACTGTC  
CGAGTCAAGAAGGGCGCCTCGCTCTGGATCCCCAAGGCTCTGCGCTTCGACAGACTCGTCGCTGGC  
CAGATCCCAACTGGCTGGGACCCCAAGCGATATGGTATCCCCGACGACATTGTGTCAGCCAAGTGGAC  
CCTGTCACCTTGTTCTTCTCGTGTGACCGCTGAGGCTCTCCTGTCTCTGGTATTACCGACCCATAC  
GAGTTTTACAAGTATGTCCACGTCTCTGAAGTTGGTAACATTGTGCGCTCTGGTATGGGTGGTGCTA  
CGGCCCTGCGTGGCATGCACAAGGCCAGATTCCAAGACAAGCCTCTTCAGAACGATATCTTGCAGG  
AGTCCTTCATCAACTATGCCTGCTTGGGTGAACATGTTGCTGCTTTCTTCGTCTGGACCTATTAAG  
ACCCCTGTGCGAGCTTGTGCCACCGCTATTGAGTCTGTGACATAGGTGTGGAGACCATTTTGGAAAG  
GCAAGGCTCGCATCTGTCTTGTGCGGTGGTCTCGACGACTTTGGTGAGGAAGGCTCTTACGAGTTCGC  
CAACATGAAGGCCACCAGCAACTCTGTGGATGAGTTTGTCTATGGCCGTACTCCTGGCGAAATGTCA  
CGTCTACGACCACTACCCGAAACGGCTTTATGGAGTCTCAGGGATGTGGTGTCCAGGTCATCATGA  
CAGCCAAGCTTGGCCTGGATATGGGAGTCCCTATTCACGGTATCCTTGCTTACACCACCACTGCCTCT  
GACAAGATTGGACGTTCCGTCCCTGCTCCTGGCAAGGGTGTCTCACGTCTGCGCGTGAGCACGCTG  
GCAAGTTCCTTCGCCACTGCTTACATCAACTACCGCCGCCGACAGATTGAGCGCCGCAAGAAGAC  
GATTAAGCAATGGGAAGAATCTGAGCTGGAGTCTTGCACGATGAAATCGATGCTATGAAGTCTCA  
GGGCGGTGTCTTTGACGAGAAGGAGTATGCTCAGGATCGCGTTGCACACATCCAGAGGGAGGCTG  
CGAGACAAGAAAAGGAGCTCCTCCGAAGCATGGGCAACAATTTCTGGAAGAGCGATCCCTCCATTG  
CTCCCTCCGTGGTGTCTTGAACATGGGGTCTTACCATTGACGACCTGAAGGTTGCCTCTTTCCAC  
GGTACATCCACCGGTGCCAACGACAAGAACGAGTCTCTGCCGTTTCCAGCAGCTGCGTACCTTG  
GCCGAAGCAAGGGTAACGCCGTCTGGGTGTCTTCCAGAAGTTCCTGACAGGTCATCCCAAGGGTG  
CTGCCGGTGTGGATGTTGAACGGTGGTCTGCAAATCCTGAACACTGGTCTGGTTCCTGGTAACAG  
GAATGCCGACAACATTGACCCCATCATGGAGGACTACGATCTAATTGTTTACCCAGCCGTAGCATC  
CAGACTGATGGAGTCAAGGCTTTCTCTCACCTCGTTCCGTTTCCGACAGAAGGGAGCCCAGGCA  
GTCGGTGTCCACCCAGATACCTGTTTCCGTTCTCGACGAAAAGACATAACCAGGAGTACTGTGCCA  
AGGTTGAGGCCCGACAGAAGAAGGCTTACCGATTCTTCCACAACGGCATGATCAGCAAACTCTGTT  
CGTCCCAAGGCTCACGCTCCTTACCCGATGAGCAGCTCAGCGAGGTTCTGATGAACCCTGATGCT  
CGTGTACCCGAAGACAAGAAGACCAAGGAGCTCAAGTATGCCGATAACTTCATGAAGGCGTCCGAA  
AAGATTGTCCCTGCTGTCACTGTCAAGGAGACACAGCAGATCATTGAGGCGCTCGCCACAAGGTG  
ACAAGCAAGAGCAGCAACGTTGGCGTAGATGTTGAGGATATCTCTGCCATCAACATTGAGAATGAC  
ACTTTTATCGAGCGCAACTTCACTAGCCAGGAGATTGCTTACTGCAAGAGCTCTGCTAGCCCCAGA  
GCTCATTGCTGGCCGATGGAGCGCCAAGGAGGCACTTTAAGTCTTGGTGTGCGCCAGCAAGG  
GAGCCGGCGCTGCCCTGAAGGATATTGAGATCCTCAAGGATGACTCTGGCGCCCTACTGTTACTCT  
TCATGGCGATGCGGCTGCTGCTGCTAAACAGGCTGGCGTGAAGGAGGTTCCGTCTCCATCTCGCAT  
GCTGATAAGCAGGCTGTTGCCGTTGCTGTTGCTCACTTTTAA

>Trichoderma guizhouense

ATGCGTCCCGAAGTCGAGCAAGAGCTCGCCACACGCTCCTCGTCGAGCTTCTGGCATACCAGTTCCG  
CCTCTCCCGTGAGGTGGATTGAGACCCAGGATGTCTTCTGGCAGAGAGAACAGCCGAGCGCATCG  
TCGAAGTCGGCCCCGAGATACCCTTGGAGTCATGGCAAAGCGCACACTGGCATCCAAGTATGAGG  
CCTACGACGCCGCAAGTCCGTTACGCGACAGATCCTCTGCTACAACAAGACGCCAAGGAGATCTA  
CTATGATGTAGACCCCGTTGAGGAAGAGCCGAGCCCGTTGCCAGCTCATCCGCTGCTCCCTCAAGT  
CAACCCGCTGCTGCCAGCGCTCCTGCGGCTGCTGCGCCAGTTGCTGCCGCTCCCGCTGCCGGCGCTG  
GGCCTGCAGCTCAGGTTCCCGATGTGCTGTCAGGCTGTGAGATTGTGCACACCTTGGTTGCACA  
GAAGCTCAAGAAATCTCTAGCTGATGTGCCCTTAGCAAGGCCATCAAGGATCTGGTTGGAGGCAA  
ATCCAATCTCCAAAATGAGATTCTCGGTGATCTTGGAAAAGAATTCGGCTCAACGCCTGAGAAGCCC  
GAAGATACGCCTCTCGACGAGCTCGCCGCTCTATGCAGGCCACCTTCGATGGCAACCTTGGCAAGC  
ACACAGTATCCCTCATCGCCAGGCTAATCTTCCAAGATGCCTGGTGGCTTCAACATCACAGTGGCC  
AGGAAATATCTGGAAACAAGATGGGGTCTCGGCCCGGCAGGCAAGACGGAGCATTGCTGCTGGC



TTTGACCATGGAGCCTGCTGCTCGTCTAGGAAACGACGGTGAGGCCAAGGGATTCTCGACGGAAT  
CGTCCAGAAATACGCCGCGAGCGCCGGTATCAGCTTGACATCTGCAGCTGCTTCTGGTGGCTCTGAA  
GGCGGATCGGGAGGCATGATGATGGATCCCGCCGATTGATGCTCTACCAAGGACCAGCGCGCC  
CTGTTCAAGCAGCAGTTGGAGCTCTTTGCCCGATACTCAAGATGGACCTCCGGGCCGCGACAAG  
GCACACATTGACTCTCAGAAATCAGAAAAGGTCTCCAAGCCCAGCTGGATCTGTGGACCGCCGAG  
CACGGCGACTTCTACGCTTCTGGCATCGAGCCTGTCTTTAGCCCGCTCAAGGCTAGATCCTACGACTC  
CTCCTGGAAGTGGGCTCGTCAGGATGCGCTACCATGTTCTACGACATTATCTTTGGCAGACTCAAG  
ACCGTCGACCGTGAAATTGTCAGCCAGTGCATTGCGATCATGAACAAGTCAAATCCCAAGTCTCTCG  
AGTTTATGCAGTACCACATCGACAACCTGCCCTACTGAGCGCGGTGAGACTTATCAGCTGGCCAAGGA  
GCTTGGTTCAGCAGCTCATTGAGAACTGCAAGGACGTCCTGAACCTTTCTCCCGTCTACAAGGACGTT  
GCTGTCCCACTGGTCTCGCACCCTGTGGATGCTCGCGGCAACCTCAACTACGAAGAAATTCCTC  
GCGCCAGCTGCAGGAAGCTCGAACACTACGTTACGAGATGGCTGAGGGTGGAAAGATTTCCGAGT  
ATGGCAACCGCACCAAGGTGCAAAACGACCTGCAGCGTATCTACAAGTTGATCAAGCAGCAGCACA  
AGATTTCCAAGACTTCTCAGCTCGAGATCAAGAGCCTGTATGGCGATGTTCTGCGCTCTCTGGCGAT  
GAACGAGAGCCAGATCCTCCCAAGGAGAATGGCAAGGGCCGAAAGCCGGTCTCAAGGGCACAA  
ACCCCAACAAGGGCCGAGTCGAGACCATCCCCTTCTCCACCTCAAGAGAAAGACTCTGCACGGCTG  
GGACTACAGCAAGAAGCTACCGCTGTCTACCTCAACTGTCTTGAGGAAGCCGCAAGGATGGTGT  
CACCTTCCAGGACAAGCATGTCCTGATGACTGGTGCCGGTGCCGGTTCATCGGTGCCGAGGTCTC  
CAGGGCCTCATCAGCGGAGGTGCCAAGGTTGTGGTTACCACTAGCCGATTCTCTCGACAGGTGACC  
GAGTACTACCAGTCCATGTACAGCCGCTTTGGCTCTCGCGGATCGCAAATCGTCGTCGTTCCCTTCAA  
CCAGGGAAGCAAGCAGGATGTGGAGGCCCTTGTCAACTACATCTACGACACCAAGACCGGTCTTGG  
CTGGGATCTCGACTTCATCGTTCCTTCGCTGCCATTCTGAGAACGGCCGACAGATTGATAGCATCG  
ATTCCAAGTCGGAGCTGGCTACCGTATTATGCTACCAACTTGATCCGCATGCTTGGTTGCGTCAAG  
GCTCAAAGGCTGAGCGTGGCTTTGAGACCCGTCCCGCCAGGTCGTCCTCCCTCTGTCCCCCAACC  
ACGGTACCTTCGGTAACGATGGTCTCTACTCCGAGTCCAAGCTGGCTCTTGAGACCCTCTTCAACCGA  
TGGCACTCCGAGGACTGGGGCCACTACCTACCATTTGCGGGCGCTGTTATCGGATGGACTCGTGGTA  
CTGGTCTCATGTCTGGCAACAACGTTGTTGCTGAGGGTGTGGAGGCGTTCGGCGTGCGAACCTTCTC  
CCAGCAAGAGATGGCCTTTAACCTGTTGGGCCTGATGTGCGCTACTATTGTTGATCTCTGCCAGTCA  
GAGCCCGTCTTTGCCGACTTGAACGGTGGTCTGCAATTCATTCCCAACCTCAACGAGTCCATGACCA  
AGCTCCGCAAGGATATCATGGAGACTAGCGAAATCCGCAGAGCCGTTACCAAGGAGAGCGCTATCG  
AGAACACCATTTGTTAACGGAGCCGACTCCGAGGTTCTTTACAAGAAAAAGACCATCGAGCCCCGTGC  
CAACATCAAGTGTGACTTCCCTCACCTGCCTGACTGGAAGACGGAGGTGGCCCCTCTCAACGACCAG  
CTGAAGGGCATGGTTGACTTGGAGAAGGTCATTGTGCTGACCGGTTTTGCGGAAGTTGGTCCCTGG  
GGTAACTCTCGAACTCGATGGGAGATGGAGGCCTACGGCGAGTTTTCGCTCGAAGGTTGCATTGAA  
ATGGCCTGGATCATGGGCCTCATCAAGAACCACAACGGTCCCCTCAAGGGCAAGCCCTACGCTGGCT  
GGGTTGACGCCAAGACTGGCGAGCCTGTCGATGACAAGGATGTCAAGCAGAAGTACGAGAAACAC  
ATCCTGGAGCACTCCGGTATTCGTTTGATCGAGCCCGAGCTGTTGACGGATATGACCCCAACAAGA  
AGCAGCTGCTCCACGAGTCTGTCATTGAGGAGGACCTGGAGCCTTTGAGGCTTCCAAGGAGACTG  
CAGAGGAATCCGACGCGAGCACGGTGACAAGGTAGAGATCTTCGAGATCCCCGAGAGTGGAGAG  
TACATTGTCCGGGTGAAGAAGGGCGCCTCGCTCTGGATCCCAAGGCTCTGCGCTTTGACAGACTCG  
TCGCCGGTCAGATCCCACTGGCTGGGATCCCAAGCGATATGGTGTCCCCGAGGACATCATCAGCCA  
GGTGGACCCTGTACCCTGTTCTTCTGTGTCGACTGCCGAAGCTCTCCTGTCGTCTGGTATCACCG  
ACCCCTATGAGTTCTACAAGTACGTTACGTCTCTGAGGTTGGTAACATTGTCGGCTCTGGTATGGGT  
GGTGTGCCGCCCTTCGTGGCATGCACAAGGCCCGATTCTCGACAAGCCTTTCAGAACGACATCT  
TGCAGGAGTCTTTCATCAACACCATGGCTGCATGGGTCAACATGTTGCTGCTCTTTCGTCTGGACCT  
ATCAAGACGCCTGTCGGCGCTTGTGCTACTGCTATTGAGTCTGTTGACATTGGTGTGAAACTATTCT  
CGAAGGCAAGGCACGCATCTGTCTCGTTGGTGGTTTCGACGACTTTGGTGAGGAAGGCTCTTATGA

GTTCGCCAACATGAAAGCCACCAGCAACAGTGTGGATGAGTTTGCCCATGGCCGTACACCCGGTGA  
GATGTCACGACCTACTACCACTACCCGAAACGGCTTCATGGAGTCTCAGGGATGTGGTGTCCAGGTC  
ATCATGACTGCCAGCTCGCTCTGGACATGGGTGTCCCGATTACGGTATCCTTGCCTTACCACCAC  
CGCTCCGACAAGATTGGACGATCCGTCCCTGCGCTGGCAAGGGTGTCTCACTTCTGCCGAGAG  
CATGCTGGCAAGTCCCATCGCCGCTGCTTGATATCAACTACCGCCGCCGACAGATTGAGCGCCGCA  
AGAAGCTGATCAAGCAGTGGGAAGAGTCTGAGTTGGAGTTCCTGCACGATGAGGTCGATGCTATGA  
AGGCCAGGGCGGTAAATTCGACGAGAAGGAGTACGCTCAGGACCGCATGCTACACATCCAGAAG  
GAGGCTGCAAGACAAACAAAGGAGCTCCTCCGAAGCATGGGTAACAACCTTCTGGAAGAGTGACCCA  
AGCATCGCTCCTCTCCGAGGTGCCCTTGCAACCTGGGGTCTTACCATTGATGATGTCAAGGTGGCCT  
CGTTCACGGCACATCCACTGGCGCCAACGACAAGAACGAGTCTGCGGCCATCTGCCAGCAGCTGC  
GTCACCTTGGCCGAAGCGAGGGCAATGCCATTATGGGTGTCTTCCAAAAGTTCCTTACTGGTCACCC  
CAAGGGTGTGCCGGTGTGGATGTTGAACGGCGGCCTGCAGATCCTCAACTCTGGATTGGTCCCT  
GGTAACAGAAACGCCGACAACATTGACCCCATCATGGAGCAATACGACCTGATTGTCTACCCAGCC  
GTAGCATCCAGACCGACGGAGTCAAGGCTTCTCCCTGACCTCCTTCGGTTTCGGACAGAAGGGAGC  
CCAGGCAGTCGGCGTTCACCCCAAGTACCTGTTGCTACCTCGACGAGAAGACTTACGATGCGTAC  
CGCGTCAAGGTTCGAGGCCCGACAGAAGAAGGCCTACCGCTACTTCCACAACGGAATGATCAGCAAC  
ACCTGTTCTGCTCCAAGGCCAACGCACCTTACAGCGATGACCAGCTCAGCGCTGTGCTGCTGAACC  
CCGATGCTCGTGTGAGCGAGGATAAGAAGACGTCGGAGCTTAAGTATGCCGCCAACTTCATGAAGC  
AGTCTGAGAAGATCACTCCCGCGACCACCGTCAAGGAGACTCAGCAGGTCATCGAAGCGCTCGCGC  
ACAAGGTGACGAGCAAGAACAGCAACGTCGGCGTTGATGTCGAGGATATTCCATCCTTCAACATTG  
ACAATGACACGTTCAATTGAGCGCAACTTACCACCCAAGAGGTGGCCTACTGCAAGACTGCCCTAG  
CCCGCAGAGCTCATTGCTGGCCGATGGAGTGCCAAGGAGGCCGTGTTCAAGGCTCTTGGTGTTC  
CAGCAAGGGAGCTGGCGCTGCCTTGAAGGACATTGAGATTCTCAAGGACGACACTGGCGCACCTGT  
TGTTACTCTCCATGGTGAAGCCGCCGCTGCCAAGCAGGCTGGTGTCAAGGAGGTCTCTGTCTCC  
ATTTACATGCCGACAAGCAGGCCGTTGCCGTAGCTGTTGCCATTTCTAA

>*Trichoderma hamatum*

ATGCGTCTGAAGTTGAGCAAGAGCTCGCCACACGCTCCTCGTTGAGCTTCTAGCATAACAGTTCC  
CCTCTCCCGTCAGGTGGATTGAGACCCAGGATGTGTTCTGGCAGAGAAGACGGCCGAGCGCATCG  
TCGAAGTCGGCCCCGAGATACCCTCGGAGTGATGGCCAAGCGCACATTGGCAGCCAAATACGAAG  
CCTACGACGCTGCCAAGTCTGTTGAGCGACAGATCCTCTGCTACAACAAAGACGCCAAGGAGATTTA  
CTACGATGTCGACCCATTGAAGAAGAGCCGAGCCCGCTGCGGCCAGCTCATCAGAGGCCCCAG  
CCAGCCTGCTGCAGGCGCTCCCGCGGCTGCTGCACCAGTTGCTGCTCCGGCTCCAGCTCAGGGCCT  
GCAGCTCAGGTTCTGATGCGCCAGTTCAGGCTGTCGAAATTGTGCACACAATCGTTGCGCAAAAAC  
TCAAAAAGGGTCTCAGCGATGTGCCTTAAAGCAAGGCCATCAAGGATCTAGTTGGAGGCAAATCCA  
CTCTTCAAGATGAGATTCTAGGTGATCTTGGAAAGGAATTCCGGCTCAACGCCTGAGAAGCCCGAAG  
ACACGCCTCTCGACGAGCTTAGTGCTTCCATGCAGGCCACCTTCGACGGTAACCTGGGCAAGCACAC  
ACAGTCACTCATCGCCAGATTGATGTCTTCGAAGATGCCTGGTGGCTTCAATATCACAGTAGCAAGA  
AAATACCTGAAACAAGATGGGGCCTTGGTTCCGGTAGACAAGACGGAGCACTGCTGCTGGCTTTG  
ACTATGGAGCCTGCTGCTCGTCTCGGAAACGAAGGCGAGGCCAAGGGATTCTTGACGGACTTGTC  
CAGAAATACGCCGCGAGCGCTGGTATCAGCCTGACGTCTGCGGCTGCTTCTGGTGGCTCTGAAGGT  
GGCTCGGGAGGCATGATGATGGATCCCGCTGCCATTGACGCCCTACCAAGGACCAGCGAGCTCTG  
TTCAAGCAGCAGCTGGAGCTCTTTGCCGATACCTCAAGATCGATCTCAGGTCGGGCGACAAGGCG  
CATATTGAGTCTCAGAAATCAGAAACGATTCTGCAGGCCAGATCGACCTGTGGACCGCAGAGCAC  
GGCGACTTCTATGCTTCTGGTATTGAGCCGTCTTACGCCATTGAAGGCGAGATCGTATGACTCGTC  
TTGGAATTGGGCTCGCCAAGATGCGCTCACTATGTTCTATGACATTATTTTCGGTAGACTCAAGACTG  
TCGACCGTGAAATTGTGAGCCAGTGCATCCGCATCATGAACAAGTCAAACCCCAAGCTTCTCGAGTT  
CATGCAGTACCACATCGATAACTGCCCTACCGAGCGCGGTGAAACCTACCAGCTCGCCAAGAAGT

GGCCAGCAGCTTATTGAGAACTGCAAGGAAGTCCTGGAGCTGTCTCCCGTTTACAAGGACGTTGCT  
GTCCCTACTGGTCTCGCACCACCGTGGATGCGCGTGGCAACCTCAACTATGAGGAAGTTCCTCGCG  
CCAGCTGCAGAAAACCTCGAGACTACGTTACAGCAGATGGCCGAGGGCGGAAAGATTTCCGAGTATG  
GCAACCGCACCAAGGTCCAGAACGACCTGCAGCGTATCTACAAGTTGATCAAGCAGCAGCACAAGA  
TGTCCAAGACTTCTCAGCTCGAAATCAAGAGCCTGTACGGTGTATGTTTTGCGCTCTCTGGCCATGAA  
CGAGAGCCAGATCATTCCCAAGGAGAACGGCAAGGGCGAGAAAGTCGGGCCTGAAGGGCACCAGCC  
TGAACAAGGGCCGGGTGAGACCATCCCATTCTTACCTCAAGAGAAAGACTTTGCACGGCTGGG  
ACTACAGCAAGAAGCTCACTGCTGTCTACCTCAACTCTTTGAGCAGGCTGCCAAGGACGGTGTAC  
CTTCCAGGACAAGTATGTCTTGATGACTGGTGTGGTGGCCGGATCCATTGGTGCCGAGGTTCTGCAG  
GGCCTTGTAGCGGAGGTGCCAAGGTTGTGGTACTACCAGCCGATTCTCTCGAGAAGTCACTGAGT  
ACTACCAGTCCGTTTACACCCGTTTTGGCTCTCGCGGATCTCAGATCGTTGTTGTCCCCTTCAACCAG  
GGAAGCAAGCAAGACGTAGAGGCTCTCGTCAACTACATCTACGACACCAAGGCTGGTCTTGGCTGG  
GATCTCGACTACATCGTTCCTTTGCTGCCATCCCTGAGAATGGCCGACAGATCGATAGCATCGACTC  
CAAGTCGGAACCTGGCCACCGTATTATGCTGACCAACTTGATCCGCATGCTCGGTTACGTCAAGTCT  
CAAAGGCTGAGCGTGGCTTCGAAACTCGTCTGCTCAAGTTGCTCCTTCCCCTGTCTCCTAACCACGG  
TACCTTCGGTAACGATGGTCTCTACTCCGAGTCTAAGCTGGCTCTTGAGACTCTTTCAACCGATGGC  
ACTCTGAGGACTGGGGCCACTACCTCACAATTTGCGGTGCTGTCATTGGATGGACTCGCGGTACTGG  
CCTCATGTCTGGCAACAACATTGTTGCCGAGGGTGTGAGGCGTTTGGCGTCCGAACATTCTCTCAG  
CAAGAGATGGCTTTCAACCTCTGGGTCTGATGTCCGCTACCATTGTCGACCTCTGCCAGTCTGAGCC  
AGTCTTTGCCGACTTGAACGGTGGTTTACAATTCATCCCCAACTTGAACGAGGCCATGACCAAGCTTC  
GCAAGGATATCATGGAGACTAGTGAATCCGCAGAATCGTTTCTAAGGAGAGCGCTATCGAGAACA  
CTATTGTCAACGGAGCCGACTCTGAGGTTCTTTACAAGAAGAAGACCATTGAGCCTCGTGCCAACAT  
CAAGTTTGACTTCCCTAATCTGCCTGATTGGAAGACTGAGGTGCTCCTCTGAACGACCAGCTCAAG  
GGCATGGTCGACTTGGAGAAGGTAGTCGTCGCTACTGGTTTCGCTGAAGTCGGCCCTTGGGGTAAC  
TCCCGAACTCGATGGGAGATGGAGGCCCATGGTGAATTCTCGCTCGAAGGTTGCATTGAAATGGCC  
TGGATCATGGGTCTCATCAAGAACCATAACGGTCTCTCAAGGGCAAGCCTTACGCTGGCTGGGTTG  
ACGCTAAGACTGGCGAACCTGTTGATGACAAGGACGTCAAGCAGAAGTACGAGAAATTCTCTCG  
ATCACGCCGGTATCCGTCTGATTGAGCCTGAGCTGTTTGACGGATATGACCCCAACAAGAAGCAGCT  
GCTTCACGAGGTTGTCATTGAAGAGGACCTTGAAGCATTGAGGCTTCCAAGGAGACTGCCGAGGA  
GTTCCGACGAGAACATGGTGACAAGGTGGAGATTTTCGAGATCCCCGAGTCTGGAGAGTTCACTGT  
CCGAGTGAAGAAGGGCGCCTCGCTCTGGATCCCCAAGGCTCTGCGCTTCGACAGACTCGTCGCTGG  
TCAGATCCCAACTGGCTGGGACCCCAAGCGATATGGTATCCCTGACGATATTGTCAGCCAAGTGGAT  
CCTGTCACCTTGTTCTTCTCGTGTGGTTGCTGAGGCCCTCCTGTCTTCTGGTATCACCGACCCATAC  
GAGTTCTACAAGTATGTCCATGTCTCTGAAGTTGGTAACATTGTCGGCTCTGGTATGGGTGGTGCTT  
CGGCCCTGCGTGGCATGCACAAGGCCAGATTCCTCGACAAGCCTCTTACAGAACGATATCTTGCAGGA  
GTCCTTCATCAACACCATGCCTGCTTGGGTTAACATGTTACTGCTCTTTCATCTGGACCTATTAAGAC  
CCCTGTCGGTGCTTGTGCCACTGCTATTGAGTCTGTTGACATTGGTGTGGAGACCATTTTGAAGGC  
AAGGCTCGCATCTGTCTTGTGCGGTGGTCTCGACGACTTTGGTGAGGAAGGCTCTTACGAGTTCGCCA  
ACATGAAGGCCACCAGCAACTCATTGGATGAGTTTGCCATGGCCGCACTCCTGGCGAAATGTCACG  
TCCTACCACTACTACCCGAAACGGCTTTATGGAGTCTCAGGGATGTGGTGTCCAGGTCATCATGACC  
GCCAAGCTTGCTCTGGATATGGGAGTCCCTATCCACGGTATCCTCGCTTACACCACCACTGCCTCTGA  
CAAGATCGGACGTTCCGTCCCTGCTCCTGGCAAGGGTGTCTCACGTCTGCGCGTGAGCATGCTGGC  
AAGTTCCCTTCGCCACTGCTTACATCAACTACCGTCGCCGACAGATTGAGCGCCGCAAGAAGCAGA  
TTAAGCAGTGGGAAGAGTCTGAGCTGGAGTCTTGCATGATGAAATCGATGCTATGAAGGCTCAGG  
GCGGTGCCTTTGACGAGAAGGAGTACGCCAGGACCGCGTCGCACACATCCAGAGGGAGGCCGGG  
AGACAAGAAAAGGAGCTCCTCCGAAGCATGGGCAACAACCTTCTGGAAGAGCGATCCATCCATCGCT  
CCCCCTCGTGGTGCTCTTGCAACATGGGGCCTTACCATTGACGACCTGAAGGTTGCCTCTTCCACGG

TACATCTACCGGTGCCAACGACAAGAACGAATCCTCTGCCGTTTGCCAGCAGCTGCGTCACCTTGGC  
AGAAGCAAGGGTAACGCCGTCCTGGGTGTCTTCCAGAAGTTCCTCACTGGTCACCCCAAGGGTGCT  
GCTGGTGTGGATGTTGAACGGTGGTCTGCAAATTCTGAACACTGGTTTGGTCCCTGGTAACAGAA  
ATGCCGACAACATCGACCCCATCATGGAAGAATACGACCTGATCGTTTACCCAGCCGTAGCATCCA  
GACTGATGGAGTCAAGGCTTCTCTCACTTCGTTCCGGTTCGGACAGAAGGGAGCCCAGGCAGTT  
GCTGTCCACCCAGATACTGTTTGCAACTCTGACCAAAAGACTTACCAGGAGTACTGCGCCAAGG  
TTGAGGCTCGACAGAAGAAGGCTTACCGTTTCTTCCACAACGGCATGATCAGCAACACTCTGTTCGT  
CCCCAAGGCCACGCTCCTTACTGATGAGCAGCTCAGCGAGGTTCTGATGAACCCTGATGCTCGT  
GTCACCGAAGACAAGAAGACAAAGGAGCTCAAGTATGCCGAGAATTTTCATGAAAGCGTCCGAAAA  
AGTTGTCCCTGCAGTACCGTCAAGGAGACACAGCAGGTCATTGAGGCACTCGCTCACAAGGTTACA  
AGCAAGAACAGCAATGTTGGTGTAGATGTGAGGATATCTCTGCCATCAACATTGAGAATGACACTT  
TCATTGAGCGCAACTTTACTAGCCAGGAGATTGCTTACTGCAAGAGTTCTGCTAGCCCCAGAGCTC  
ATTCGCTGGCCGATGGAGCGCCAAGGAAGCAGTCTTCAAGTCTCTTGGCGTCGCTAGCAAGGGAGC  
CGGTGCTTCTTGAAGGATATTGAGATCCTCAAGGATGATTCCGGTGCACCCACTGTTACTCTTCATG  
GCGATGCGGCTGCTGCTGCTAAGCAGGCTGGTGTGAAGGAGTTTCCGTCTCCATCTCCCATGCTGA  
TAAGCAGGCTGTTGCCGTGGCAGTTGCTCACTTCTAA

>Trichoderma harzianum

ATGCGTCCCGAAGTCGAGCAAGAGCTCGCCACACGCTCCTCGTCGAGCTTCTGGCATACCAGTTCCG  
CCTCTCCCGTGAGGTGGATTGAGACCCAGGATGTCTTCTGGCAGAGAGAACAGCCGAGCGCATCG  
TCGAAGTCGGCCCCGAGATAACCCTTGGAGTCATGGCAAAGCGCACACTGGCATCCAAGTACGAGG  
CCTACGACGCCGCAAGTCGGTTCAGCGACAGATCCTCTGCTACAACAAGACGCCAAGGAGATCT  
ACTATGATGTAGACCCGTTGAGGAAGAGCCCCGAGCCTGTTGCCAGCTCATCCGCTGCTCCCACAAG  
TCAACCCGCTGCTGCCAGCGCTCCTGCGGCTGCTGCGCCAGTTGCTGCTGCTCCCGCTGCCGGCGCT  
GGACCTGCAGCTCAGGTTCCCGATGTGCCTGTCCAGGCTGTGAGATTGTGCACACCTTGTTGCAC  
AGAAGCTCAAGAAGTCTCTAGCTGATGTGCCTCTTAGCAAGGCCATCAAGGATCTGGTTGGAGGCA  
AATCCACTCTTCAAAATGAGATTCTCGGTGACCTTGGAAAGGAATTCGGCTCAACACCTGAGAAGCC  
CGAAGATACACCTCTCGACGAGCTCGCCGCTCTATGCAGGCTACCTTCGATGGCAACCTTGGCAAG  
CACACAGTATCCCTCATCGCTAGGCTCATCTCCTCAAGATGCCTGGTGGCTTCAACATCACAGTGGC  
CAGGAAATATCTGGAAACAAGATGGGGTCTCGGCCCGGCAGGCAAGACGGAGCATTGCTGCTGG  
CCTTGACCATGGAGCCTACTGCCCGTCTAGGAAACGACGGTGAGGCCAAGGGATTCTCGACGGAA  
TTGTCCAGAAATACGCCGAGCGCCGGTATCAGCTTGACATCTGCAGCTGCTTCTGGTGGCTCTGA  
AGGAGGTGCGGGAGGCATGATGATGGATCCCGCCGCATCGATGCTCTACCAAGGACCAGCGCG  
CCCTGTTCAAGCAGCAGTTGGAGCTCTTGGCAGATACTCAAGATGGACCTCCGGGCCGCGACAA  
GGCACACATTGACTCCCAGAAATCAGAAAAGGTTCTCCAAGCTCAGCTGGATCTGTGGACCGCCGA  
GCACGGCGATTTCTACGCTTCTGGTATCGAGCCTGTCTTTAGCCCGCTCAAGGCTAGATCCTACGACT  
CCTCCTGGAAGTGGGCTCGTCAGGATGCGCTCACCATGTTCTACGACATTATCTTTGGTAGACTCAAG  
ACCGTCGACCGTGAAATTGTCAGCCAGTGCATTGCATCATGAACAAGTCAAATCCCAAGCTCCTCG  
AGTTTATGCAGTACCACATCGACAACCTGCCCTACTGAGCGCGGTGAGACCTACCAGCTGGCCAAGG  
AGCTTGGTCAGCAGCTCATTGAGAACTGCAAGGACGTTCTGAACCTTTCCCCGTCTACAAGGACGT  
TGCTGTCCCCACTGGTCTCGCACCCTGTGGACGCTCGTGGCAACCTCAACTACGAAGAGGTTCCC  
CGCGCCAGCTGCAGAAAGCTCGAGCACTACGTTACAGCAGATGGCTGAGGGTGGAAAGATTTCCGAG  
TATGGCAACCGCACCAAGGTGCAAAACGACCTGCAGCGTATCTACAAGTTGATCAAGCAGCAGCAC  
AAGATTTCAAGACTTCTCAGCTCGAGATCAAGAGCCTGTACGGCGATGTTCTGCGCTCTCTGGCCA  
TGAACGAGAGCCAGATCCTCCCCAAGGAGAATGGCAAGGGCCGAAAGCCAGGTTCAAGGGCACA  
AACCCCAACAAGGGCCGAGTCGAGACCATCCCCTTCTCCACCTCAAGAGAAAGACCTTGCACGGCT  
GGGACTACAGCAAGAAGCTCACTGCTGTCTACCTCAACTGTCTTGAGGAAGCGGCCAAGGATGGTG  
TCACCTTCCAGGACAAGTATGTCCTGATGACTGGTGCCGGTGCCGGTTCATTGGTGCCGAGGTCCT

GCAGGGCCTCATCAGCGGAGGTGCCAAGGTTGTGGTTACCACTAGCCGATTCTCTCGACAGGTGAC  
CGAGTACTACCAGTCCATGTACAGCCGCTTTGGCTCTCGCGGATCGCAAATCGTCGTCGTTCCCTTCA  
ACCAGGGAAGCAAGCAGGATGTGGAGGCTCTTGTCAACTACATCTACGATGCCAAGACCGGTCTCG  
GCTGGGATCTCGACTTCATTGTTCCCTTCGCTGCCATTCTGAGAACGGCCGACAGATTGATAGCATC  
GATTCCAAGTCGGAGCTGGCTCACCGTATTATGCTACCAACTTGATCCGCATGCTTGGCTGCGTCA  
AGACTCAAAGGCTGAGCGTGGCTTCGAGACCCGTCCCGCCAGGTGCTCCTCCCTGTCCCCCAA  
CCACGGTACCTTCGTAACGATGGTCTCTACTCCGAGTCCAAGCTGGCTCTTGAGACCCTCTTCAACC  
GATGGCACTCCGAGGACTGGGGCCACTACCTCACCATTGCGGTGCTGTCATCGGATGGACTCGTG  
GTACTGGTCTCATGTCTGGCAACAACGTTGTTGCTGAGGGTGTGGAGGCGTTCGGCGTGCGAACCT  
TCTCCAGCAAGAGATGGCCTTCAACCTGTTGGGCCTGATGTCAGCTACCATTGTTGATCTCTGCCAG  
TCAGAGCCCGTCTTTGCCGACTTGAACGGTGGCCTGCAATTCATCCCCAACCTGAACGAGTCCATGA  
CCAAGCTCCGCAAGGATATCATGGAGACTAGCGAAATCCGCAGAGCCGTTACCAAGGAGAGCGCTA  
TCGAGAACACCATTGTTAACGGAGCCGACTCCGAGGTTCTTTACAAGAAGAAGACTATCGAGCCCCG  
TGCCAACATCAAGTGTGACTTCCCTCACCTGCCTGACTGGAAGACGGAGGTGGCCCTCTCAACGAC  
CAGCTGAAGGGCATGGTTGACTTGGAGAAGGTCATTGTTGTGACCGGTTTTGCGGAAGTTGGTCCC  
TGGGGTAACTCTCGAACTCGATGGGAGATGGAGGCCTATGGCGAGTTTTCGCTCGAAGGTTGCATC  
GAAATGGCCTGGATCATGGGCCTTATCAAGAACCACAACGGTCCCCTCAAGGGCAAGCCCTATGCT  
GGCTGGGTTGACGCCAAGACTGGCGAGCCCGTCGATGACAAGGATGTCAAGCAGAAGTACGAGAA  
GCACATCCTGGAGCACTCCGGTATTCGTTTATCGAGCCCGAGCTGTTGACGGATATGACCCCAAC  
AGAAGCAGCTGCTCCACGAGGTCGTTATCCAAGAGGACCTGGAGCCTTTCGAGGCTTCCAAGGAG  
ACTGCAGAGGAATCCGACGCGAGCATGGTGACAAGGTGGAGATCTTCGAGATCCCCGAGAGTGG  
AGAGTACATTGTCCGGTGAAGAAGGGCGCCTCACTCTGGATCCCCAAGGCTCTGCGCTTTGACAG  
ACTCGTCGCCGGTCAAGTCCCGACTGGCTGGGACCCCAAGCGATATGGTGTCCCCGAGGACATCAT  
CAGCCAGGTGGACCCTGTCACCCTGTTCTTCTCGTGTGACTGCCGAGGCTCTGCTGTCGCTGGTA  
TCACCGACCCCTATGAGTTCTACAAGTACGTTACGTCCTGAGGTTGGTAACATTGTCGGCTCTGGT  
ATGGGTGGTGTGCTGCAGCCCTTCGTGGCATGCACAAGGCCCGATTCCCTCGACAAGCCTCTCAGAACG  
ACATCCTGCAGGAGTCTTTCATCAACACCATGGCTGCATGGGTCAACATGTTGCTGCTCTTTCGTC  
GGACCTATCAAGACGCTGTCGGCGCTTGTGCTACTGCTATTGAGTCTGTCGACATTGGTGTGGAGA  
CTATTCTCGAAGGCAAGGCACGCATCTGTCTCGTTGGTGGTTTTGACGACTTTGGTGAGGAAGGCTC  
TTATGAGTTCGCCAACATGAAGGCCACCAGCAACAGTGTGGATGAGTTTGCCATGGCCGTACACCC  
GGTGAAATGTCACGACCTACTACCACTACCCGAAACGGCTTCATGGAGTCTCAGGGATGTGGTGTCC  
AGGTCATCATGACTGCCAGCTCGCTCTGGACATGGGTGTCCCGATCCACGGTATCCTTGCCTTACC  
ACCACCGCTTCGACAAGATTGGACGATCCGTCCCTGCGCCTGGCAAGGGTGTCTCACTTCTGCC  
GAGAGCATGCTGGCAAGTTCATCGCCGCTGCTTATCAACTACCGCCGCGACAGATTGAGCG  
CCGCAAGAAGCTGATCAAGCAGTGGGAGGAGTCTGAGTTGGAGTTCCTGCACGATGAGGTTGATG  
CTATGAAGGCTCAGGGCGGTAAATTGACGAGAAGGAGTACGCTCAGGACCGCATGCTGCACATCC  
AGAAGGAGGCCGCAAGACAAACAAAGGAGCTCCTCCGAAGCATGGGTAACAACCTTCTGGAAGAGT  
GACCAAGCATCGCTCCTCTCCGAGGTGCCCTGCAACCTGGGGTCTTACCATTGATGATGTCAAGG  
TGGCCTCGTTCCACGGCACATCCACTGGCGCAACGACAAGAACGAGTCTGCGGCCATCTGCCAGCA  
GCTGCGTCACTTGGCCGAAGCGAGGGCAATGCCATTATGGGTGTCTTCCAAAAGTTCCTTACTGGT  
CACCCCAAGGGTGTGCCGGTGTGATGTTGAACGGCGGCCTGCAGATCCTCAACTCTGGATTG  
GTCCCTGGTAACAGAAACGCCGACAACATTGACCCCATCATGGAGCAATACGACCTGATTGTCTACC  
CCAGCCGTAGCATCCAGACTGACGGAGTCAAGGCCTTCTCCCTGACCTCGTTTTGGTTTCGGACAAA  
GGGAGCCCAGGCAGTCGGTGTTCACCCCAAGTATCTGTTGCTACCCTCGACGAGAAGACTTACGAT  
GCGTACCGCGTCAAGGTCGAGGCCCGACAGAAGAAGGCCTACCGCTACTTCCACAACCGGAATGATT  
AGCAACACCCTGTTTGTCTCCAAGGCCAACGCGCCTTACAGCGATGACCAGCTCAGCGCTGTGCTGC  
TGAACCCCGATGCTCGTGTGAGCGAGGATAAGAAGACGGCGGAGCTTAAGTATGCCGCCAACTTCA

TGAAGCAGTCTGAGAAGATCACTCCCGCGACCACCGTCAAGGAGACTCAGCAGGTCATCGAAGCGC  
TCGCGCACAAAGTGACGAGCAAGAACAGCAACGTCGGCGTTGATGTGCGAGGATATTCCATCCTTCA  
ACATTGACAATGACACGTTTCATTGAGCGTAACTTACCACCCAAGAAGTGGCCTACTGCAAGACTGC  
CCCTAGCCCCGAGAGCTCATTTGCTGGCCGATGGAGTGCCAAGGAGGCCGTGTTCAAGGCCCTTGG  
TGTTGCCAGCAAGGGAGCTGGCGCTGCCTTGAAGGACATTGAGATTCTCAAGGACGACACCGGCGC  
GCCTGTTGTTACTCTCCATGGTGAAGCCGCCGCCGTGCCAAGCAGGCTGGTGTCAAGGAGGTCTC  
GGTCTCATTTCACACGCCGACAAGCAGGCCGTTGCCGTAGCAGTTGCCATTTCTAA

>Trichoderma parareesei

ATGCGTCCCGAAGTCGAGCAGGAGCTCGCCACACGCTCCTCGTCGAGCTTCTGGCATACCAATTCCG  
CCTCGCCCGTGAGATGGATTGAGACCCAGGATGTCTTCTGGCTGAGAGAAACGCCGAGCGCATCG  
TCGAAATCGGCCCGCAGACACCCTTGGAGTCATGGCCAAGCGCACACTGGCCTCCAAGTACGAGG  
CCTACGATGCCGCAAAGTCGGTTCAGCGACAGATTCTCTGCTACAACAAGGATGCCAAGGAGATTTA  
CTACGATGTGACCCCGTGAAGAAGAACCCGAACCCGCGGCGAGCTCATCTGCTGCCCCGCTGC  
CCCGGCCGCTGCCGCGCTCCTGCGGCTGCTGCTGCTCCAGTTGCTGCTGCTCCGCTCCAGCGCT  
GGACCTGCAGCCAGGTCCCCGACCAGCCTGTGCAGGCCGTGCAAATTGTGCACACCCTGGTTGCG  
CAAAAGCTCAAGAAGTCCCTGGCTGAGGTGCCTCTCAGCAAGGCCATCAAGGATCTGGTTGGAGGC  
AAATCCACCCTTCAGAATGAGATTCTCGGTGACCTTGGAAAGGAATTCGGCACAACGCCTGAGAAG  
CCCGAAGACACACCCTCGACGAGCTCAGTGCTTCCATGCAGGCTACCTTCGATGGCAACCTGGGCA  
AGCACACACAGTCCCTCATCGCCAGGCTCATCTCCTCAAGATGCCTGGTGGCTTCAACATAACCGT  
GGCAAGGAAATATCTGGAACAAGATGGGGCCTCGGTCCCGGCAGGCAAGACGGAGTGTTGCTAC  
TGGCCTTGACCATGGAGCCTCCTGCTCGTCTTGAAACGATGGTGATGCCAAGGCTTACCTCGACGG  
AGTTACCCAGAAATACGCCGCGACTGCCGGTATCAGCTTGACGTCTGCGGCCGCATCTGGTGGCTCT  
GAGGGAGGCGCGGGAGGCATGATGATGGACCCGCTGCCATTGACGCTCTACCAAGGACCAGCG  
CGCTCTGTTCAAGCAGCAGCTGGAGCTTTCGCCAGATACCTCAAGATGGACCTCAGAGCCGGCGA  
CAAGGCGCACATCGAATCCAAAAGTCAGAAAAGGTCCTTCAGGCCAGCTGGATCTGTGGACTGC  
AGAGCACGGCGACTTCTACGCTTCGGGCATTGAGCCTGTCTTCAGCGCATTGAAAGCTAGATCTTAC  
GACTCATCTGGAAGTGGGCTCGCCAAGATGCGCTCTCCATGTACTACGATATCATCTTTGGCAGACT  
CAAGACGGTCGACCGTGAGATTGTCAGCCAGTGCAATTCGCATCATGAACAAGTCCAACCCCAAGCTC  
CTCGAGTTCATGCAGTACCACATCGACAACCTGCCCACTGAGCGCGGCGAGACCTACCAGCTCGCCA  
AGGAGCTTGGACAGCAGCTCATTGAGAAGTCAAGGAGGTTCTAACCTGCCACCTGCTTACAAGG  
ACGTTGCTGTCCCCACTGGTCTCGCACACCGTGGACGCCCGGCAACCTCAACTACGAGGAAGT  
CCCTCGCGCCAGCTGCCGGAAGCTCGAGCACTACGTTGAGCAGATGGCCGAGGGCGGCAAGATCTC  
CGAGTATGGCAACCGCACCAAGGTGCAGAACGACCTGCAGCGTATCTACAAGTTGATCAAGCAGCA  
GCACAAGATGTCCAAGACTTCTCAGCTCGAGATCAAGAGCCTGTACGGTGATGTTCTGCGCTCCCTG  
GCCATGAACGAGAGCCAGATCATCCCAAGGAGAATGGCAAGGGCCGAAAGCCCGTTTCAAGGG  
CTCAAGCCCGAACAAGGGCAGGGTTGAGACAATCCCTTCTCCACCTCAAGAGGAAGTCCCTGCAC  
GGCTGGGACTACAGCAAGAAGCTCACGGCCGTCTACCTCAACTGCCTTGAGGAGGCTGCCAAGGAT  
GGCGTACGTTCCAGGACAAGTATGTCCTGATGACGGGTGCCGGTGCCGGCTCCATTGGTGCCGAG  
GTTCTGCAGGGTCTCATCAGCGGAGGTGCCAAGGTTGTGGTCACCACCAGTCGATTCTCTCGACAGG  
TCACCGAGTACTACCAGTCCATGTACAGCCGCTTTGGTTCCCGCGGATCTCAGATCGTCGTGTCGCC  
TTCAACCAGGGAAGCAAGCAGGACGTGGAGGCCCTCGTCAACTACATCTACGACACCAAGAACGGC  
CTTGGCTGGGATCTCGACTACATCGTCCCCTTCGCCGCCATTCCGGAGAATGGCCGACAGATTGACA  
ACATCGACTCCAAGTCGGAGCTGGCTCACCGCATCATGCTCACCAACCTGATCCGCATGCTCGGCTG  
CGTCAAGACGCAAAGGCTGAGCGCGGTTTCGAGACCCGTCTGCCAGGTCGTCTCCCCCTGTCC  
CCCAACCACGGTACCTTTGGTAACGACGGTCTCTACTCCGAGTCCAAGCTGGCTCTCGAGACCCTTT  
CAACCGATGGCACTCTGAGGACTGGGGCCACTACCTCACTATCTGCGGTGCTGTTATCGGATGGACT  
CGTGGCACTGGTCTCATGTCCGGTAACAACGTGGTCCCGAGGGCGTGGAGGCCTTTGGCGTTCGC

ACCTTCTCTCAGCAAGAGATGGCCTTTAACCTTCTGGGCCTGATGTCCGCCACCATCGTTGACCTCTG  
CCAGTCCGAGCCGGTCTTTGCCGACTTGAACGGTGGCCTGCAGTTCATCCCCAACTTGAACGAGTCC  
ATGACCAAGCTCCGCAAGGACATCATGGAGACAAGCGAGATCCGCAGGGCCGTCTCCAAGGAGAG  
CGCCATCGAGAACACCATTGTCAACGGAGCCGACTCCGAGGTTCTTTACAAGAAGAAGACCATCGA  
GCCCCGTGCCAACATCAAGTGCGACTTCCCCACCTTCCGACTGGAAGACGGAGGTGGCTCCTCTC  
AACGAGCAGCTCAAGGGCATGGTTCGACTTGGACAAGGTTGTCGTCTGACTGGTTTTCGCCGAAGTC  
GGTCTTGGGGCAACTCCCGCACCCGATGGGAGATGGAGGCCTATGGCGAGTTTTCGCTCGAGGGC  
TGCATTGAGATGGCCTGGATCATGGGCCTCATCAAGAACCACAACGGTCCCCTCAAGGGCAAGCCCT  
ACGCCGGTGGGTTGATGCCAAGACTGGCGAGCCCGTGCAGCACAAGGATGTCAAGCAAAAAGTAC  
GAGAAGCACATCCTGGAGCACTCCGGTATCCGCCTGATCGAGCCTGAGCTCTTTGACGGATACGACC  
CCAACAAGAAGCAGCTGCTGCACGAGGTCGTCATCCAGGAGGACCTTGAGCCGTTGAGGCCTCCA  
AGGAGACGGCTGAGGAGTCCGCGCGAGCATGGCGACAAGGTGGAGATCTTTGAGATCCCCGAG  
AGCGGAGAGTACATTATCCGGGTCAAGAAGGGCGCCTCGCTTTGGATCCCTAAGGCTCTGCGCTTC  
GACAGACTGGTTCGTGGTTCAGATCCCGACCGGCTGGGACCCCAAGCGATATGGTATTCTGAAGAC  
ATCATCAGCCAGGTGGACCCCGTACCCTGTTCTCCTCGTGTGCGTTGCTGAGGCCCTGCTGTCGT  
TGGTATCACCGACCCGTACGAATTCTACAAGTACGTTACGTCTCCGAGGTCGGTAACATTGTCGGC  
TCCGGTATGGGTGGCGCCAAGGCTCTGCGTGGCATGCACAAAGCGGATACTCGACAAGCCTCTT  
CAGAACGACATCCTGCAGGAGTCGTTTCATCAACACCATGTCTGCTTGGGTCAACATGCTGCTGCTCT  
CTTCGTCTGGACCTATCAAGACTCCCGTCCGGTCTTGTGCTACTGCTATCGAGTCTGTTGACATTGGT  
GTGGAGACGATTCTTGAAGGCAAGGCCCGCATCTGCCTGGTTCGGAGGTTTTGACGACTTTGGTGA  
GAGGGTTCATATGAGTTTGCCAACATGAAGGCCACCAGCAACAGCTTGGACGAGTTCGCCACGGC  
CGTACCCCGCGGAGATGTCACGTCCCACCACTACCACGCGAAACGGCTTCATGGAGTCTCAGGGAT  
GCGGTGTCCAGGTCATCATGACTGCTCAGCTGGCCCTGGATATGGGAGTCCCGATCCACGGTATCCT  
CGCCTTACCACCACCGCCTCCGACAAGATTGGCCGATCCGTCCCTGCTCCTGGCCAGGGAGTTCTCA  
CGTCCGCGCGTGAGCACCCCGCAAGTTCCCGTCGCCCTGCTTGACATCAACTACCGCCGAGGCA  
GATTGAGCGTCGCAAGAAGCAGATCAAGCAGTGGGAGGAGTCCGAGCTGGAATTCCTCACGACG  
AGATTGACGCCATGAAGGCCCAAGGCGGCGTCTTTGACGAGAAGGAGTATGCTCAGGAGCGCATCC  
TGCACATCCAGAAGGAGGCTATCCGACAAGAAAAGGAGCTCCTCCGAGCATGGGCAACAACCTTCT  
GGAAGAACGACCCCGCATCGCTCCTCTCCGAGGCGCCCTTGCCACATGGGGCCTCACCATCGACGA  
CCTCAAGGTGGCCTCGTTCCACGGCACGTCCACAGGCGCCAACGACAAGAACGAGTCTCAGCCATC  
TGCCAGCAGCTGCGCCATCTTGGCCGAGCAAGGGCAACGCCATCCTCGGTGTCTCCAGAAGTACC  
TCACCGGTACCCCAAGGGTGTGCTGCTGGTGCCTGGATGATGAACGGTGGTCTGCAAATCCTCAACAC  
TGGCCTGGTCCCCGGCAACCGCAATGCCGACAACATTGACCCCATCATGGAGAACTACGACCTGATT  
GTCTACCCAGCCGACGATCCAGACCGACGGTGTCAAGGCCTTCTCCCTCACCTCGTTCCGTTTTCGG  
ACAGAAGGGAGCCCAGGCGGTCCCGTCCACCCCAAGTACCTGTTCCGCCACCTAGACGAGAAGAC  
GTACGACGCGTACCGCGCCAAGGTCGAGTCCCGACAGAAGAAGGCTTACCGCTTCTCCACAACGG  
CATGATTAACAACGCCCTGTTTGTCTCCAAGGCCAACCCGCCCTACACTGACGACCAGCTCAGCGCG  
GTTCTGATGAACCCGATGCTCGTGTGGTTCGAGGACAAAAAGACGGCGGAGCTCAAGTTCCCCCCC  
AACTTCATGAAGGCATCCGAGAAGACTGTCTCTCCGACCGTCGCCAAGGAGACGCAGCAGGTGATT  
GAGGCGCTCGCGACAAGGTGGCGGGCAAGAACAGCAATGTGGGCGTGGACGTCGAGGACATTG  
CATCCTTCAACATTGACAACGACACGTTTCATTGAGCGCAACTTTACCAGCCAGGAGGTGGCCTACTG  
CAAGAGCGCTCCAGCCCAGAGCTCGTTTGCCGGCCGATGGAGCGCCAAGGAGGCGGTGTTCAA  
GGCTCTTGGCGTCGCCAGCAAGGAGCTGGCGCTGCCCTGAAGGACATTGAGATCCTCAAGGACGA  
CACCGGCGCACCTGTTGTTTCTTTCATGGTGTGCTGCTGCTGCCAAGCAAGCTGGCGTGAAG  
GAGGTCTCCGTCTCCATCTCGCATGCCGACAAGCAGGCCGTTGCCGTGGCGGTTGCCCACTTCTAA

>Trichoderma reesei

ATGCGTCCCGAAGTCGAGCAGGAGCTCGCCACACGCTCCTCGTCGAGCTTCTGGCATAACCAATTCCG

CCTCGCCCGTGAGATGGATTGAGACCCAGGATGTCTTCCTGGCTGAGAGAAACGCCGAGCGCATCG  
TCGAAATCGGCCCGCAGACACCCTTGGAGTCATGGCCAAGCGCACACTGGCCTCCAAGTACGAGG  
CCTACGATGCCGCAAAGTCGGTTCAGCGACAGATTCTCTGCTACAACAAGGATGCCAAGGAGATTTA  
CTACGATGTCGACCCCGTGAAGAAGAACCCGAACCCGCGGGGAGCTCATCTGCTGCCCCGCTGC  
TCCGGCCGCTGCCGGCGCTCCTGCGGCTGCTGCTCCAGTTGCTGCTGCTCCGGCTCCAGCGCTGGA  
CCTGCAGCCAGGTCCCCGACCAGCCTGTGCAGGCCGTCGACATTGTGCACACCCTGGTTGCGCAAA  
AGCTCAAGAAGTCCCTGGCTGAGGTGCCTCTCAGCAAGGCCATCAAGGATCTGGTTGGAGGCAAAT  
CCACCCTTCAGAATGAGATTCTCGGTGACCTCGGAAAGGAATTCGGCACAACGCCTGAGAAGCCCG  
AAGACACACCCTCGACGAGCTCAGTGCTTCCATGCAGGCTACCTTCGATGGCAACCTGGGCAAGCA  
CACACAGTCCCTCATCGCCAGGCTCATCTCCTCCAAGATGCCTGGTGGCTTCAACATAACCGTGGCA  
AGGAAATATTTGAAACAAGATGGGGCCTCGGTCCCGGCAGGCAAGACGGAGTGTTGCTGCTGGC  
CTTGACCATGGAGCCTCCTGCTCGTCTTGAAACGATGGTGATGCCAAGGCTTACCTCGACGGAGTT  
ACCCAGAAATACGCCGCGACTGCCGGTATCAGCTTGACGCTGCGGGCCGCATCTGGTGGCTCTGAG  
GGAGGCGCGGAGGCATGATGATGGACCCGCTGCCATTGACGCTCTACCAAGGACCAGCGCGC  
TCTGTTCAAGCAGCAGCTGGAGCTTTCGCCAGATACCTCAAGATGGACCTCAGAGCCGGCGACAA  
GGCGCACATCGAATCCCAAAGTCGGAAAAGTCCCTCAGGCCAGCTGGATCTGTGGACTGCAGA  
GCACGGCGACTTCTACGCTTCGGGCATTGAGCCTGTCTTCAGCGCATTGAAAGCTAGATCTTACGAC  
TCGTCCTGGAACCTGGGCTCGCCAAGATGCGCTCTCCATGTACTACGACATCATCTTTGGCAGACTCA  
AGACGGTCGATCGTGAGATTGTCAGCCAGTGCATTGCGATCATGAACAAGTCCAACCCCAAGCTCCT  
CGAGTTCATGCAGTACCACATCGACAACCTGCCCTACTGAGCGCGGCGAGACCTACCAGCTCGCCAAG  
GAGCTTGACAGCAGCTCATTGAGAACTGCAAGGAGGTTCTCAACCTGCCACCTGCTTACAAGGAC  
GTTGCTGTCCCCACTGGTCTCGCACACCCTGGACGCCCGCGGCAACCTCAACTACGAGGAAGTCC  
CCCGCGCCAGCTGCCGGAAGCTCGAGCACTACGTTACGAGATGGCCGAGGGCGGCAAGATCTCCG  
AGTATGGCAACCGCACCAAGGTGAGAAACGACCTGCAGCGTATCTACAAGTTGATCAAGCAGCAGC  
ACAAGATGTCTAAGACTTCTCAGCTCGAGATCAAGAGCCTGTACGGTGATGTTCTGCGCTCCCTGGC  
CATGAACGAGAGCCAGATCATCCCCAAGGAGAATGGCAAGGGCCGAAAGCCCGTTTCAAGGGCT  
CAAGCCCGAACCAAGGGCAGGGTTGAGACAATCCCTTCTCCACCTCAAGAGGAAGTCCCTGCACG  
GCTGGGACTACAGCAAGAAGCTCACGGCCGTCTACCTCAACTGCCTTGAGGAGGCTGCCAAGGACG  
GCGTCACGTTCCAGGACAAGTATGTCCTGATGACGGGTGCCGGTGCCGGCTCCATTGGTGCTGAGG  
TTCTGCAGGGTCTCATCAGCGGAGGTGCCAAGGTTGTGGTCACCACCAGTCGATTCTCTCGACAGGT  
CACCGAGTACTACCAGTCCATGTACAGCCGCTTTGGATCCCGCGGATCTCAGATCGTCGTCGTGCC  
TTCAACCAGGGAAGCAAGCAGGACGTGGAGGCCCTCGTCAACTACATCTACGACACCAAGAACGGC  
CTTGGCTGGGATCTCGACTACATCGTCCCCTTCGCCGCCATTCCGGAGAATGGCCGACAAATTGACA  
ACATCGACTCCAAGTCGGAGCTGGCTCACCGCATCATGCTCACCAACCTGATCCGCATGCTCGGCTG  
CGTCAAGACGCAAAGGCTGAGCGCGGTTTCGAGACCCGTCCCGCCAGGTCGTCTCCCCCTGTCC  
CCCAACCACGGTACCTTTGGTAACGACGGTCTCTACTCCGAGTCCAAGCTGGCTCTCGAGACCCTCTT  
CAACCGATGGCACTCCGAGGACTGGGGCCACTACCTCACCATCTGCGGTGCTGTCATTGGATGGACT  
CGTGGCACTGGTCTCATGTCCGGTAACAACGTGGTCGCCGAGGGCGTGGAGGCCTTTGGCGTTCCG  
ACCTTCTCTCAGCAAGAGATGGCCTTTAACCTTCTGGGCCTGATGTCCGCCACCATCGTTGACCTCTG  
CCAGTCCGAGCCGGTCTTTGCCGACCTGAACGGTGGCCTGCAGTTCATCCCCAAGTGAACGAGTCC  
ATGACCAAGCTCCGCAAGGACATCATGGAGACGAGCGAGATCCGCAGGGCCGTCTCCAAGGAGAG  
CGCCATCGAGAACACCATTGTCAACGGAGCCGACTCCGAGGTTCTTTACAAGAAGAAGACCATCGA  
GCCCCGTGCCAACATCAAGTGCAGCTTCCCCACCTTCCCGACTGGAAGACGGAGGTGGCTCCTCTC  
AACGAGCAGCTCAAGGGCATGGTGCAGTTGGACAAGGTTGTGTCGTGCTGACTGGTTTCGCCGAAGTC  
GGTCTTGGGGCAACTCCCGCACCCGATGGGAGATGGAGGCCTATGGCGAGTTTTCGCTCGAGGGC  
TGCATTGAGATGGCCTGGATCATGGGCCTCATCAAGAACCACAACGGTCCCCTCAAGGGCAAGCCCT  
ATGCCGGCTGGGTTGATGCCAAGACTGGCGAGCCCGTCGATGACAAGGATGTCAAGCAAAGTAC



GAGAAGCACATCCTGGAGCACTCCGGTATCCGCCTGATCGAGCCTGAGCTCTTTGACGGATACGACC  
CCAACAAGAAGCAGCTGCTGCACGAGGTCGTCATCCAGGAGGACCTTGAGCCGTTGAGGCCTCCA  
AGGAGACGGCTGAGGAGTTCCGCCGCGAGCATGGCGACAAGGTGGAGATCTTCGAGATCCCCGAG  
AGCGGAGAGTACATTATCCGGGTCAAGAAGGGCGCCTCGCTTTGGATTCCCAAGGCTTTGCGCTTC  
GACAGACTGGTCGCTGGTCAGATCCCAGCCGCTGGGACCCCAAGCGATATGGTATTCTGAAGAC  
ATCATCAGCCAGGTGGACCCCGTACCCTGTTCTCCTCGTGTGCGTTGCTGAGGCTCTGCTGTCGTC  
TGGTATCACCGACCCGTACGAGTTCTACAAGTACGTTACGTCCTCCGAGGTTGGTAACATTGTCGGC  
TCCGGTATGGGTGGTGCCAAGGCTCTGCGTGGCATGCACAAGGCGCGATACCTCGACAAGCCTCTT  
CAGAACGACATCCTGCAGGAGTCCTTCATCAACACCATGTCTGCTTGGGTCAACATGCTGCTGCTCTC  
TTCGTCTGGACCTATCAAGACTCCCGTCGGTGCTTGTGCTACTGCTATTGAGTCTGTTGACATTGGTG  
TGGAGACAATTCTTGAAGGCAAGGCCCGCATCTGCCTGGTCGGAGTTTTGACGACTTTGGTGAGG  
AGGGTTCTATGAGTTTGCCAACATGAAGGCCACCAGCAACAGCTTGGACGAGTTCGCCACGGCC  
GTACCCCGCCGAGATGTCACGTCCCACCACTACCACGCGAAACGGCTTCATGGAGTCTCAGGGATG  
CGGTGTCCAGGTCATCATGACTGCTCAGCTGGCCCTGGATATGGGAGTCCCGATCCACGGTATCCTC  
GCCTTACCACCACCGCCTCCGACAAGATTGGCCGATCCGTCCCTGCTCCTGGCCAGGGCGTTCTCAC  
CTCCGCGCGGAGCACCCCGCAAGTTCCCGTCGCCCTGCTTGACATCAACTACCGCCGAGGCAG  
ATTGAGCGTCGCAAGAAGCAGATCAAGCAGTGGGAGGAGTCCGAGCTGGAATTCCTTCATGACGA  
GATTGACCCATGAAGGCCAGGGCGGCGTCTTTGACGAGAAGGAGTACGCTCAGGAGCGTATCCT  
GCACATCCAGAAGGAGGCTATCCGACAAGAAAAGGAGCTCCTCCGAGCATGGGCAATAACTTCTG  
GAAGAACGACCCAGCATCGCTCCTCTCCGAGGCGCCCTTGCCACATGGGGCCTCACCATCGACGAC  
CTCAAGGTGGCCTCGTTCCACGGCACGTCACGGCGCCAACGACAAGAACGAGTCTCGGCCATC  
TGCCAGCAGCTGCGCCATCTTGGCCGAGCAAGGGCAACGCCATCCTCGGTGTCTTCCAGAAGTACC  
TCACCGGTCACCCCAAGGGTGCTGCTGGTGCTGGATGATGAACGGTGGCCTGCAGATCCTCAACA  
CTGGCCTGGTCCCGGCAACCGCAATGCCGACAACATTGACCCCATCATGGAGAACTACGACCTGAT  
TGCTACCCAGCCGACGATCCAGACCGACGGTGTCAAGGCCTTCTCCCTCACCTCGTTCCGTTTCG  
GACAGAAGGGAGCCCAGGCGGTCGCCGTCCACCCCAAGTACCTGTTCCGCCACCTGGACGAGAAGA  
CGTACGACGCGTACCGCGCCAAGGTGCGAGTCCCAGACAAGAAGGCTTACCGCTTCTCCACAACG  
GCATGATCAACAACGCCTTGTGTTGCTCCAAGGCCAACCCGCCCTACACTGACGACCAGCTCAGCGC  
GGTTCTGATGAACCCCGATGCTCGTGTGGTTCGAGGACAAGAAGACGGCGGAGCTCAAGTTCCCCC  
CAACTTCATGAAGGCGTCCGAGAAGACTGTCTCTCCGACCGTCGCCAAGGAGACGACGAGGTGAT  
TGAGGCGCTCGCGCACAAGGTGGCGGGCAAGAACAGCAACGTGGGCGTGGATGTGAGGACATTG  
CATCCTTCAACATTGACAACGACACGTTTATTGAGCGCAACTTTACCAGCCAGGAGGTGGCCTACTG  
CAAGAGCGCTCCAGCCCGCAGAGCTCGTTTGCCGGCCGATGGAGCGCCAAGGAGGCGGTGTTCAA  
GGCTCTTGGCGTTGCCAGCAAGGGAGCTGGCGCTGCCCTGAAGGACATTGAGATCCTCAAGGACGA  
CACCGGCGCACCTGTTGTTTCTTTCATGGTGTGCTGCTGCTGCCAAGCAAGCTGGCGTGAAG  
GAGGTCTCCGTCTCCATCTCGCATGCCGACAAGCAGGCCGTTGCCGTGGCGGTTGCCACTTCTAA

>Trichoderma virens

ATGCGTCCCGAAGTCGAGCAAGAGCTCGCCACACGCTCCTCGTCGAGCTTCTGGCATAACCAGTTCCG  
CCTCTCCCGTGAGGTGGATTGAGACCCAGGATGTGTTCTGGCTGAGAGAACGGCCGAGCGCATCG  
TCGAAGTCGGCCCCGAGATACCCTCGGAGTCATGGCAAAGCGCACACTGGCATCTAAGTATGAGG  
CCTACGATGCCGCCAAGTCGGTTCAGCGACAGATCCTCTGCTACAACAAGGACGCCAAGGAGATCT  
ACTATGATGTAGACCCTGTTGAGGAAGAGCCTGAGCCGTTGCCAGCTCATCCGCTGCCCCCTCCAG  
TCAACCCGCCACTGCCAGCGCTCCTGCGGCTGCTGCGCCAGTTGCTGCTGCTCCCGCCGCCAGTGCT  
GGACCTGCAGCTCAGGTTCCCGATGCGCCTGTGCAGGCTGTGACATTGTGCACACACTGGTTGCGC  
AAAAGCTCAAGAAGCCTCTGACTGAGGTGCCTCTCAGCAAGGCCATCAAGGATCTGGTTGGAGGCA  
AATCCACCCTCCAAAATGAGATTCTCGGTGATCTTGAAAAGAATTCGGCTCAACGCCTGAGAAGCC  
CGAAGATACGCCTCTCGACGAGCTCTGCTTCTATGCAGGCTACCTTCGATGGCAACCTTGGAAG

CACACACAATCCCTCATCGCCAGGCTCATCTCCTCCAAGATGCCTGGTGGCTTCAACATCACAGTGGC  
AAGGAAATATCTGGAAACAAGATGGGGTCTTGGCCCCGGCAGACAAGATGGAGCATTGCTGCTGG  
CTTTGACCATGGAGCCTGCCGCTCGTCTAGGAAACGACGGTGAAGCCAAGGGATTCTCGATGGAA  
TCGTTTCAGAAATACGCCGGAATGCCGGTATCAGCCTGTCATCTGCGGCCGCTACTGGTGGCTCTGA  
AGGAGGTGCGGGAGGCATGATGATGGATCCCGCCGCCATTGACGCTCTACCAAGGACCAGCGCG  
CGCTGTTCAAGCAGCAGTTGGAGCTCTTTGCCAGATACCTCAAGATGGACCTCCGGGCCGGCGACA  
AGGCGCACATTGACTCCCAGAAATCAGAAAAGGTCTCCAGGCCAGCTGGATCTGTGGACCCGAG  
AGCATGGCGATTTCTACGCTTCCGGTATCGAGCCTGTCTTTAGCCCCTTGAAGGCTAGATCCTATGAC  
TCGTCCTGGAACCTGGGCTCGTCAGGATGCGCTCACCATGTTCTATGACATTATCTTCGGCAGACTCAA  
GACCGTCGACCGTGAAATCGTCAGCCAGTGCATTGTCATCATGAACAAGTCAAATCCCAAGCTCCTC  
GAGTTTATGCAGTACCACATCGACAACCTGCCCCACTGAGCGAGGCGAGACCTACCAGCTGGCCAAG  
GAACTTGGTCAGCAGCTCATTGAGAACTGCAAGGAGGTTCTGAACGCATCCCCTGTTTACAAGGAC  
GTTGCTGTCCCTACTGGCCCTCGCACACGGTTGACGCTCGCGGCAACCTCAACTACGAAGAGGTTT  
CCCGCGCCAGCTGCAGGAAGCTCGAGCACTACGTTGAGCAGATGGCTGAGGGTGGAAAGATTTCTG  
AGTATGGCAACCCGACCAAGGTGCAGAATGACCTGCAGCGTATCTACAAGTTGATCAAGCAGCAGC  
ACAAGATTTCCAAGACTTCTCAGCTCGAGATCAAGAGCTTGTACGGCGATGTTCTGCGCTCCCTGGC  
CATGAACGAGAGCCAGATCCTCCCCAAGGAGAATGGCAAGGGCCGAAAGCCAGGTCTCAAGGGCA  
CAAACCCCAACAAGGGCAGAGTCGAGACCATCCCCTTCTCCACCTCAAGAGAAAGACTCTGCATGG  
CTGGGACTACAGCAAGAAGCTCACTGCTGTCTACCTCAACTGTCTTGAGGAGGCGGCCAAGGATGG  
TGCACTTTCCAGGACAAGTATGTCCTGATGACTGGCGCTGGTGCCGGTTCCATTGGTGCCGAGGTC  
CTGCAGGGCCTCATCAGCGGAGGTGCCAAGGTTGTCGTTACCACCAGCCGATTCTCTCGACAGGTCA  
CCGAGTATTACCAGTCCATGTACAGCCGCTTGGCTCTCGCGGATCGCAGATCGTCGTCGTTCCCTTC  
AACCAGGGAAGCAAGCAAGATGTGGAGGCTCTTGTGCGACTACATCTATGACACCAAGAACGGTCTT  
GGCTGGGATCTCGACTTCATCGTTCCCTTCGCCGCCATCCCCGAGAACGGCCGACAGATTGATAGCA  
TCGACTCCAAGTCAGAGCTGGCTCACCGTATTATGCTCACCAACTTGATTGCGATGCTCGGCTGTGTC  
AAGACTCAAAGGCTGAGCGTGGCTTTGAGACTCGTCCCGCCAAGTTGTCCTCCCTCTGTCCCCCA  
ACCACGGTACCTTCGGTAACGATGGTCTCTACTCCGAGTCCAAGCTGGCTCTTGAGACCCTCTTCAAC  
CGATGGCACTCCGAGGACTGGGGCCACTACCTACCATTTGCGGTGCCGTTATCGGATGGACTCGTG  
GTACTGGTCTCATGTCTGGCAACAACGTTGTGCTGAGGGTGTGGAAGCGTTCCGGCGTGCGAACCT  
TCTCCCAACAAGAGATGGCCTTTAACTTGTGGCCTGATGTCAGCTACTATTGTTGATCTCTGCCAG  
TCAGAGCCTGTCTTTGCCGACTTGAACGGTGGCCTGCAATTCATTCCCAACTTGAACGAGTCCATGAC  
TAAGCTTCGCAAGGACATCATGGAGACCAGCGAAATCCGCAGAGCCGTCAGCAAGGAGAGTGCCAT  
CGAGAACACCATTGTTAACGGAGCCGACTCTGAGGTTCTTTACAAGAAGAAGACCATCGAGCCCCGT  
GCCAACATCAAGTGTGACTTCCAACCCTGCCCCGATTGGAAGACGGAGGTGGCCCCTCTCAACGATC  
AGCTCAAGGGTATGGTCGACTTGGAGAAGGTCGTTGTCGTGACTGGTTTTGCCGAGGTTGGTCCTT  
GGGGCAACTCCCGAACTCGATGGGAAATGGAGGCCTACGGCGAGTTTTTCGCTCGAAGGCTGTATCG  
AAATGGCCTGGATCATGGGCCTCATCAAGAACCACAACGGTCCCCTCAAGGGCAAGCCCTACGCTG  
GCTGGGTTGATGCCAAGACCGGCGAGCCGTTGATGACAAGGACGTCAAGCAGAAGTACGAGAAG  
CACATTCTGGAGCACTCTGGTATCCGTTTGATTGAGCCCGAGCTGTTTGACGGATATGACCCCAACC  
AGAAGCAGCTGCTCCACGAAGTCGTCATTCAAGAGGACTTGGAGCCTTTCGAGGCTTCCAAGGAGA  
CTGCGGAGGAATTCCGACGCGAGCACGGTGACAAGGTGGAGATTTTCGAGATCCCCGAGAGCGGA  
GAGTACATCGTCCGCGTCAAGAAGGGCGCTTCGCTCTGGATCCCCAAGGCTCTGCGCTTCGACAGAC  
TCGTCGCTGGTCAGATCCCAACTGGTTGGGATCCCAAGCGATATGGTGTCCCCGAAGACATCATCAG  
CCAAGTGGACCCTGTCACCCTGTTCTACTCGTGTGAGTTGCCGAGGCCCTCTTGTGCTGCTGGTATTA  
CCGACCCATATGAGTTCTACAAGTACGTTACGCTCTCTGAGGTTGGTAACATTGTCGGCTCTGGTATG  
GGTGGTGCCAAGGCCCTGCGCAGCATGCACAAGGCCCGATACTCGACAAGCCTGTTCAGAACGAT  
ATCTTGCAGGAATCTTTCATCAACACCATGGCTGCATGGGTCAACATGTTGCTGCTCTCTCCTCTGG

ACCTATCAAGACCCCTGTCGGCGCTTGTGCTACCGCCATTGAATCTGTCGACATTGGCGTGGAGACG  
ATTCTCGAAGGCAAGGCACGCATCTGCCTTGTGGTGGCTTCGACGACCTTGGCGAGGAGGGTTCTT  
ATGAGTTTGCCAAACATGAAGGCTACCAGCAACACTGTGGACGAGTTCGCCATGGCCGTACACCCG  
GCGAAATGTCGCGTCTACCACCACTACCCGAAACGGCTTTATGGAGTCTCAGGGATGCGGTGTCCA  
GGTCATCATGACTGCTCAGCTCGCTCTGGACATGGGAGTCCCTATTCACGGTATCCTTGCCTTACCA  
CCACCGCCTCTGACAAGATTGGACGATCCGTCCCTGCACCTGGCAAGGGTGTCTCACATCTGCACG  
AGAGCACGCCGGCAAGTTCCCATCGCCGCTGCTTGATATCAACTACCGCCGCCAGATTGAGCGT  
CGAAGAAGCTGATCAAGCAGTGGGAAGAGTCTGAGTTGGAATTCCTGCACGATGAGGTTGATGCT  
ATGAAGGCCAGGGTGGTGCCTTTGACGAGAAGGAGTACGCTCAGGATCGCATGCTGCACATCCAG  
AAGGAGGCCGCAAGACAAGAAAAGGAGCTCCTCCGAAGCATGGGCAACAACCTTCTGGAAGAGCGA  
CCCAAGCATCGCTCCACTCCGAGGTGCCCTTGCAACCTGGGGCCTTACCATTGACGACCTCAAGGTG  
GCCTCGTTCCACGGCACATCCACTGGCGCCAACGACAAGAACGAGTCCGCGCCATCTGTGACGAG  
CTGCGTACCTTGGCCGAAGCGAGGGCAATGCTATCATGGGTGTCTTCCAAAAGTTTCTTACTGGTC  
ACCCAAGGGTGTCTGCTGGTGTCTGGATGTTGAACGGCGGCCTGCAGATCCTCAACTGGAGTGG  
TCCCTGGTAACAGAAATGCCGACAACATTGACCCCATCATGGAGCAATACGACCTGATTGTCTACCC  
GAGCCGTAGCATCCAGACCGACGGAGTCAAGGCTTTCTCCTTGACCTATTTGGTTTCGGACAGAAG  
GGAGCTCAGGCAGTCGCCGTTACCCCAAGTATCTGTTTCGCTACCCTCGACGAGAAGACTTACGATG  
CGTACCGCGTCAAGGTCGAGGCCGACAGAAGAAGGCCTACCGCTTCTCCACAATGGAATGATCA  
GCAACACCCTGTTTGTCTCCAAGGCCAATGCTCCTTACACTGACGAGCAGCTGAGCGCTGTTCTGCT  
GAACCCTGATGCTCGTGTGACCGAGGATAAGAAGACAGCAGAGCTCACATATGCGGCCAACTTCAT  
GAAGGCGTCTGAGAAGGTCACTCCTGCGGCCACTGTCAAGGAGACGCAGCAGGTCATCGAGGCGC  
TCGCTACAAGGTGACGAGCAAGAACAGCAACGTGGGCGTTGATGTGCGAGGATATCCCTCATTCA  
ACATTGACAATGACACTTTTATTGAGCGCAACTTCACCAGCCAGGAAGTGGCCTACTGCAAGACTGC  
TCCTAGCCCGCAGAGCTCGTTCGCCGGCCGATGGAGCGCCAAGGAAGCCGTGTTCAAGGCTCTTG  
TGTTGCCAGCAAGGGAGCTGGCGCTGCCTTGAAGGACATTGAGATTCTCAAGGACGATACTGGCGC  
ACCTGTCGTTACTCTTCATGGTGAAGCGGCTGCTGCTGCTAAGCAAGCCGGTGTAAAGGAGGTCTCG  
GTCTCCATTTACACGCCGATAAGCAGGCCGTTGCCGTGGCAGTTGCCATTTTTAG

---

**Appendix S4.** *lcb2* cds retrieved from the genomes of the 13 species analyzed in the present work

>Trichoderma arundinaceum

ATGCCGCGGCGGCTCGCAAACCCCTTCTCCTCTAGTCAGTCTGCCATGTCGGTGCCCGAAAAGACTG  
GCGAAAGACGTCTCTCTGCCTCAAAGACCAACCGACTGAGCCAGCTCTTCTCGTCCAGCCCAAAGTC  
CAAGGACCAGGCATCCCTAGCCACCATGCATCAAAGCCAGATGAGCACCATCTCGCCGTCGACGGT  
GTCGCTGCCACCATCTCCCTCTCCACCGCGACGGGCGAGTCCAACAACGTCGAGCCAACCACGACG  
CTGTTCAAGCCTCAGTCTGCTGAAGAGGTGAGCTGCGGCGACGCGTGGAGGCTCAATTGCTCCTC  
TGCTCGATCCGGCCACCTCTACGTCAGCCAGTCTACGGCCGGCCCTTCCAGCGGCCGATTGAGGA  
CGAGCCTCCGTAATACTTTCTTTGACCACGTACCTGAGTTATCTTGCTCTTATTCTGTTTGCCACAT  
TCGTGATTTCTTTGGCAAGCGGTTCCGGCGACCGCAAGCGCTACCTGCCCTCAAGGTGCACAATGGG  
TTTGCACCCCTCAATGATGATTTTCGACAGCTTCTACACCAGACGCTTGAAGCTCCGCTTGACGACTG  
CTTTGCCCGAACCACCATTTGGTGTCCCCGGCCGCTACATCACCTCCTGGACCGGAAATCGGAAGAC  
TACAATTACACTTACCGCTACACCGGCACCCCACTGAGACGCTAAACATGAGTTCCTACAACACTCT  
CGGTTTCGCTCAGTCAGAGGGTCCCTGCGCCGATGCCGTGACGAGTGCCTCAAGAAGTATGGTGT  
CACCTTTGGAAGCCCCGATCTGAGAGCGGCACTCCGATCTGGCCGTTGAGGTGAGCGGGAAAT  
TGCGTCCTTTGTTGAAAGCCCGACGCCATGGTCTTTTCCATGGGCTACGTCACCAACGCCAGCACG  
TTCCCTGCGCTTGTGTCCAAGGGTGCCTCATCATCTCCGACGAACTGAACCACGCCTCTATCCGAAT  
TGGTGCTCGTCTCTCCGGTGCCGTCATCCAGTCTTTCAAGCACAACGACATGGACGCCCTGGAGCGC  
GTTCTCCGTGAAGCCATCTCTCAAGGCCAACCAGGACTCACCGCCCCTGGAAGAAGATTCTCGTGG  
TTGTCGAAGGTCTCTACTCCATGGAAGGCAGCATGGTTCGACCTGCCCGGTATCCTGGCTCTCAAGAA  
GAAGTACAAGTTCTACCTGTTTATTGACGAGGCTCACTCCATCGGTGCCCTGGGACCCCGTGGCCGC  
GGCGTCTGCGATTACTTTGGCATTGATCTGCGGAAGTGCACATTCTCATGGGCACCCTGACCAAGT  
CTTTGCGGCCAACGGAGGCTACGTTGCTGCGGACAAGCACATTGTCGATAAGCTCCGTGCCACCAA  
TGCTCTACCATCTTCGGCGAAGTCCCTGCCCTGTGTTCTCATGCAGATTCTCACGTGCTGAGGC  
TGATTACTGGAGAAATCTGCCCTGGTCAAGGTGAAGAGCGTCTGCAGCGCATTGCCTTCAACTCTCG  
TTATCTTCGTCTCGGACTTAAGCGTCTCGGCTTAATTGTGGCTGGTACGACGATTCCCCCATCATCC  
CCGTCCTGCTTTACAACCCTGGAAAGATGCCTGCCTTACGCCGCGAGATGCTCAAGCGTAAAATCTC  
CGTCGTGCTGTCGCTACCCGGCCACTCCGCTCATCAGCTCGCGTTCGCTTCTGCATCTCTGCCG  
CCCACAACAAGGATGATCTTGACCGGATGCTCATCGCCTGCAACGAGGTGGGCGATCTGCTCCAGCT  
CAAGAACTCCACGGGAATTGCCGGTGGCTTGGAGCCGCTGCCCGAGGGTGTGGCGCCAGAAGACG  
AGGCCGAGTGGAGGAGGGTCAACAACATCCCAATCAAGGCCCTCGATGGGACGTCAAGGAGGTC  
ATTCGACGAGGTGTCGTCGACTGCAAGCTTCTCTGCGGTAA

>Trichoderma asperellum

ATGCCGCGACGGCTTGCAAACCCCTTCTCCTCTACCCAGTCTGCTATGTCAGCATCCGAGAAGACTG  
GCGAAAGACGTCTCTCGTCTCCAAGACCAACCGACTGAGCCAGCTGTTCTCATCCAGCCCAAAGTC  
CAAGGACCAGTCGCTCTCGCCGCCATGCATCAAAGCCAGATGAACAACACCATCTCGCCGTCGACG  
GTGTCGCTGCCACCATTTCCCTGTCCACCGCGACTGGGGAGCCCAACAACGTCGAGCCAGCCAAGA  
TGCTGTTCAAGCCTCAATCGGCCGAGGAGCAGGAGCATCGACGACGACCGAGGCCAGTTTGGAC  
CTCTGCTTGACCCATCCACCGCTATGTTAGCAAGTCAATGGCGAAGAGTTCAAGGAGCCGATTGA  
GGACATGCCCCCTACTTCTTTCTTTGACCACCTACATAAGCTATCTCCTTCTGATCATCTTTGGCCAT  
TGTCGCGATTACTTTGGCAAACGTTTTGGCGATAAAAAGCGCTACAATGCCCTCAAAGTGCGAACG  
GGCTTGCGCCTCTCACTGATGATTTTCGACAGCTTCTACACCCGACGCTTGAAAGGCCGTCTGGATGA  
CTGCTTTGCTCGACCTACTTTTGGTGTTCGGGCGCTTTCATCACTCTCAAGGAACGTACGGCAGACA  
GGCTTAACCGCCACTATCACTACACTGGTAACCACATTGAGACGCTCAACGTGAGTTCGTACAACAT  
CTCGGCTTTGCTCAATCCGAGGGTCCCTGTGCCGACGCTGTCGATGAATGTGTCAGAAGTACGGCG

TTACCGCTGCAAGCCCCCGTGGTGACAGCGCACTTCCGACTTGGCCCTTGAAGTCGAGCGCGAAG  
TTGCGGCCTTTGTTGAAAGCCAGATGCCATGGTCTTCTCTATGGGTTATGTTACCAACTCCAGTACT  
TTCCCTGCTCTCGTGTCAAAGGCTGCCTGATCATCTCTGACGAACTGAACCACGCCTCCATCCGTGT  
CGGTGCTCGTCTCAGTGGCGCCGTCATCCAGTCGTTCAAGCATAACGATATGACCGCTCTGGAGCGT  
GTTCTTCGTGAAGCCATCTCTCAGGGCCAGCCAAGGACTCACCGCCCCTGGAAGAAGATTCTTGTCG  
TTGTCGAAGGTCTCTACTCTATGGAAGGTACCATGGTTAATCTACCCGCAATTGTGGCCCTCAAGCAC  
AAGTACAAGTTCTACTTGTACGTTGACGAAGCCCCTCCATCGGTGCCCTAGGACCCCGTGGCCGTG  
GTGTCTGTGATTACTTTGGCATTGACACCTCGGAGGTTGACATCCTTATGGGTAATCTGACCAAGTCG  
TTTGGCGCAATGGAGGCTACATTGCGGCTGAGAAGCACATCATTGACAAGCTCCGTGCCACTAATG  
TCTGCTCAATCTACGGCGAAGCTCCTTCTCCTTTTGTCTCATGCAGATTCTTACTTCGATCAAGCTGA  
TTAACGGCGAGATTTGCCCTGGAGAGGGCGAGGAGCGCCTCCAGCGAATCGCCTTCAACTCCCCT  
ATCTTCGTCTTGGACTCAAGCGTCTTGGCTTGATCGTTGCTGGCTCTGATGACTCTCCATTATCCCCG  
TCCTCCTGTACAACCCCGGAAAGATGCCTGCCTTCAGCCGCGAAATGCTCAAGCGCAAAATCTCCGT  
CGTCATTGTTGGTTACCCGGCTACCCCGCTCATCAGCTCGCGTGCCCGCTTCTGCATCTCTGCCGCTC  
ACAACAAGGATGATCTTGACCGAATGATCAGGGCCTGTGATGAGGTTGGCGACATGCTTCAGCTCA  
AGTTCTCATCAGGCATTGCCGGCGGCTTGGAGCCACTGCCTGCTGGTGTGGCACCAGAAAATGAGG  
CTGAGTGGAGGAAGGCCAACACGTCCCCATCAAGCCTCCTCGATGGGATGTTGAGGAGGTCATTC  
GACGAGGCGCCGCGATTGCAAGCTTCTCTGCGATAA

>Trichoderma atrobrunneum

ATGCCGCGACGGCTTGCAAATCCCTTCTCCTCCAGCCAGTCTGCCATGTCAGCGTCCGAAAAGACTG  
GCGAACGACGTCTCTCAACCTCAAAGACCAACCGACTGAGCCAGCTCTTCTCGTCCAGCCCCAAAGTC  
CAAGGACCAGGCCACCATGCATCAAAGCCAGATGAGCACCATCTCGCCGTCGACGGTGTGCTGCC  
CACCATTTGCTGTCCACTGCGACTGGTGAGTCCAACACCGTTCGAGCCGACCACGACGCTGTTCAAG  
CCTCAGTCGCGGAGGAGGTGGAGCGACGCGACGCGTTCGAGTCTCAATTTGGCCCGCTGCTTTCT  
CCTGAGCACTTGTACACCAGCCAGGCCGAGGCAAGCCCTTTGAGCGGCCGATTGAAGACGAGGCT  
CCATACTACTATCTTGGACCACCTACCTGAGCTACTTGGCGCTCATTCTGTTGGCCACGTTCTGTGAT  
TTCTTTGGCAAGCGGTTTCGGCGACCCGAAACGCTATCTGCCTCTCAAGATTACAATGGATTGCTCC  
CCTCAATGATGATTTGACAGCTTCTACAGCCGACGCTCAAGACGCGTCTGGACGACTGCTTTGCC  
CGCACCCTGTCGGCGTCCCGGCGCTTTCATCACCTCAAGGACCGCAAGTCCGACGACTACAACCT  
ACACCTACCGCTACACTGGCACCTACACTGAGACGCTAAACATGAGTTCTACAACCTATCTCGGTTTT  
GCTCAGTCTGAGGGTCCCTGTGCCGATGCCGTCGAGGAATGCGTCAAGAAGTACGGAGCCACCTTT  
GCCAGCCCCGAGCTGACAGCGGCACTTCTGATTTGGCTCTTGAAGTTGAGCGAGAAATTGCGTCTT  
TTGTTGAAAGCCCCGACGCCATGGTCTTCTCCATGGGCTACGTCACCAACTCCAGCACGTTCCCTGC  
GCTTGTGTCAAAGGCTGCCTGATCATCTCCGACGAGCTGAACCATGCCTCTATCCGAATCGGTGCT  
CGTCTTCTGGTGTGCTGCTCATTAGTCGTTCAAGCACAATGACATGGGCCACCTCGAGCGTGTCTTCG  
TGAAGCCATTTCCAGGGCCAGCCAAGGACTCACCGCCCCTGGAAGAAGATTCTTGGTTCGTCGAA  
GGTCTCTACTCGATGGAAGGTACCATGGTCAACCTGCCCGAATCCTGGAAGTGAAGCGCAAGTAC  
AAGTTTTACCTGTTTATCGACGAGGCTCACTCCATCGGTGCCCTGGGACCCACGGCCGTGGCGTTT  
GCGATTACTATGGCGTTGACACCTCGGAAGTCGACATCCTCATGGGCACTCTGACCAAGTCTTTCGG  
CGCCAACGGAGGCTACGTTGCTGCGGAGAAGCACATCATTGACAAGCTCCGCAGACCAACGCCTC  
CACCATCTTTGGCGAGGCCCTGCCCTCGGTTCTCATGCAGATTCTTGCCTCCCTCAAGCTGATTA  
ACGGAGATATTTGCCCTGGCCAGGGCGAGGAGCGCCTGAAGCGCATTGCCTTCAACTCTCGTACCT  
TCGCCTCGGACTCAAGCGTCTTGGTATGATTGTGACTGGCCACGACGACTCACCCATCATCCCCGTCC  
TGCTTTACAACCCCGGAAAGATGCCTGCCTTCAGTCGTCAGATGCTTGGCCGCAAAATCTCCGTGCTC  
GTCGTGCGTTATCCCGCTACTCCGCTCATCAGCTCGCGTGTCTGCTTCTGCGTCTCTGCTGCCACAA  
CAAGGATGACCTCGACCGAATGCTCATTGCCTGTGACGAGGTTGCCGACCTTCTCCAGCTCAAGTAC  
TCCACAGGAATTGCCGGTGGTTTGGACCCTCTGCCGAGGGCGTGCACCAGAAGACGAGGCTGAG

TGGAGGAAGAACACTGGCACTCCCATCAAGGCCCGATGGAAGGTTGAGGACGTCATTTCGACGA  
GGTGTCTGTTGACTGCAAGCTCCCTCTGCGGTGA

>*Trichoderma atroviride*

ATGCCGCGACGGCTCGCAAACCCCTTCTCCTCTACCCAGTCTGCTATGTCAGCATCCGAGAAGACTG  
GCGAAAGACGTCTCTCGTCTCCAAGACCAACCGACTGAGCCAGCTCTTCTCCTCCAGCCCAAAGTCC  
AAGGATCAGTCACTACTCGCCGCATGCCGAGAGCCAGATGAACACCATCTCGCCGTGACGGTG  
TCGCTGCCACCATTTGCTGTGACGGCGACCGGCGAGCCCAACAGCATCGAGCCAACCAAGATG  
CTGTTCAAGCCGCAATCGGCCGAGGAGCAGGAGCAGCGACGGCTCGCCGAGTCTCAATTTGGCCCT  
CTGCTTGATCCGTCCACCGCTATGTCAGCCAGTCCAATGGCGAGACGTTCAAGGAGCCGATTGAGG  
ATATGCCTCCGTAATCTATCTCCTGACCACCTACTTGAGCTATCTCTTCTTGATCATCATTGGCCACT  
GTCGCGATTATTTGGCAAGCGTTTTGGCGATAAAAAGCGCTACAACGCCCTCAAAGTGCAAACGG  
GCTCGCGCTCTCACTGATGATTTGACAGCTTCTACAGCCGCCGGCTGAAGGGTCGTTTGGATGAC  
TGCTTTGCTCGACCTACGTACGGCGTTCCCGGCCGTTTATTACCCCTCAAGGAACGTACGGCAGACA  
GGCTTAACCGCAACTACCTACTGAAACCACGTCGAGACACTCAACGTGAGCTCTACAATA  
CCTCGGCTTTGCTCAATCGCAGGGCCCTGCGCCGATGCTGTGATGAATGTGTCAAGAAATACGGT  
GTTACCGCTGCAAGCCCCGCGGCGATAGCGGCACTTCCGACCTAGCCCTCGAAGTTGAACGCGAA  
GTTGCATCCTTTGTCGAAAGCCAGAGGCCATGGTCTTCTCCATGGGCTATGTGACCAACTCCAGTA  
CCTTCCCTGCTCTCGTGTCAAAGGGCTGCCTGATTGTCTCCGACGAACTGAACCATGCCTCCATCCGT  
GTCGGTGCTCGCCTCAGTGGCGCCGTTATCCAATCTTTCAAGCACAACGACGTGGTTCGCCCTGGAGC  
GTGTTCTTCGTGAAGCCATCTCCAGGGCCAGCCAAGGACTCACCGCCCTGGAAGAAGATTCTCGT  
CGTTGTCAAGGTCTCTACTCTATGGAAGGTACTATGGTCAATCTGCCGGCAATTGTGGCCCTCAAG  
CGAAGTACAAGTTCTACCTGTACGTTGACGAGGCTCACTCTATTGGTGCCCTGGGACCCCGTGGCC  
GTGGTGTCTGTGATTACTTTGGCGTTGACCCCTCCGAGGTTGACATTCTCATGGGCACCCTGACCAA  
GTCCTTTGGCGCCAACGGAGGCTACATTGCGGCAGAGAAGCACATCATTGACAAGCTCCGTTCCACC  
AACGTCTGCTCAATCTACGGCGAAGCCCCTTCTCCTTTTGTCTCATGCAGATTCTTACCTCGATCAAG  
CTGATCAACGGCGAGATTTGCCCTGGCCAGGGCGAGGAGCGTCTCCAGCGAATTGCCTTCAACTCTC  
GCTATCTTGCCTTGACTCAAGCGTCTTGACTCATCGTTGCTGGCTCTGATGATTCTCCATTATCC  
CCGTTCTGCTGTACAACCCCGAAAGATGCCTGCCTTTAGCCGCGAAATGCTCAAGCGCAACATCTC  
TGTTGTATCGTTGTTACCCGGCCACCCGCTCATCAGCTCGCGTGCCCGCTTCTGCATCTCTGCCG  
CTCATAACAAAGATGACCTTGACCGAATGATCAGAGCCTGTGATGAAGTTGGCGACATGCTCCAGAT  
CAAGTTCTCATCAGGCATTGCTGGCGGCTTGAGCCGCTGCCTGCTGGTGTAGCACCAGAAAATGA  
GGCTGAGTGGAGGAGGCTAACAATGTCGCCATCAGGCCTCCTCGATGGGATGTGGAAGAGGTCA  
TTCGACGAGGTGCCGTTGATTGCAAGCTTCTCTGCGATGA

>*Trichoderma* sp. T154

ATGCCGCGACGGCTTGCAAATCCCTTCTCCTCCAGCCAGTCTGCCATGTCAGCGTCCGAAAAGACTG  
GCGAACGACGTCTCTCAACCTCAAAGACCAACCGACTGAGCCAGCTCTTCTCGTCCAGCCCAAAGTC  
CAAGGACCAGGCCGATGCATCAAAGCCAGATGAGCACCATTTGCGCGTGCACGGTGTGCTGCC  
CACCATTTGCTGTCCACTGCGACTGGTGAGTCCAACACCGTTCGAGCCGACCACGACGCTGTTCAAG  
CCTCAGTCGGCCGAGGAGGTGGAGCGACGGCGACGCGTCGAGTCTCAATTTGGCCCGCTGCTTTCT  
CCCGAGCACTTGTACACCAGCCAGGCCGCGGGCAAGCCCTTTGAGCGGCCGATTGAAGACGAGCCT  
CCGTAATACTATCTTGTACCACCTACCTGAGCTACTTGGCTCTCATTCTGTTTGGCCACGTTTCGCGAT  
TTCTTTGGCAAGCGATTGGCGACCGCAAGCGCTATCTGCCTCTCAAGATTACAATGGATTGCTCC  
CCTCAATGATGATTTGACAGCTTCTACACCCGACGCTCAAGAGGCGTCTGGACGACTGCTTTGCG  
CGCACCCTGTCGGCGTCCCTGGCCGCTTATCACCCCTCAAGGACCGCAAGTCGGACGACTACAAC  
ACACCTACCGCTACTGACACTGACACTGAGACGCTAAACATGAGTTCTACAACCTATCTCGGTTTT  
GCTCAGTCTGAGGGTCCCTGTGCCGATGCCGTCGAGGAATGCGTCAAGAAGTATGGAGCCACCTTT  
GCCAGCCCCGAGCTGACAGCGGCACTTCTGATTTGGCTCTCGAAGTCGAGCGGGAAATTGCGTCTCT

TTGTTGGAAAGCCCGACGCCATGGTCTTCTCCATGGGCTACGTCACCAACTCCAGCACGTTCCCTGCA  
CTTGTGTCCAAGGGTTGCCTGATCATCTCCGACGAACTGAACCATGCCTCTATCCGAATCGGTGCTCG  
TCTTTCTGGTGTGTCAATCAGTCGTTCAAGCACAACGACATGGGCGACCTCGAGCGTGTCTTCTCGT  
AAGCCATTTCTCAGGGCCAGCCAAGGACTCACCGCCCCTGGAAGAAGATTCTCTTGGTCGTGAAG  
GTCTCTACTCGATGGAAGGTACCATGGTCAACCTGCCCGAATCCTGGAAGTGAAGCGCAAGTACA  
AGTTTTACCTGTTTCATCGACGAGGCTCACTCCATCGGTGCCCTGGGACCCACGGCCGTGGCGTTTG  
CGATTACTATGGCGTTGACACCTCGGAAGTCGATATCCTCATGGGCACTCTGACCAAGTCTTTCGGC  
GCCAACGGAGGCTACGTTGCTGCGGAGAAGCACATCATTGACAAGTCCGCAGACCAACGCCTCC  
ACCATCTTGGCGAGGCCCTGCCCTCGTTCATTATGCAGATTCTTGCTCCCTCAAGCTGATTAA  
CGGAGAGATTTGCCCTGGCCAGGGTGAGGAGCGCCTGAAGCGCATTGCCTTCAACTCTCGCTACCTT  
CGCTCGGACTCAAGCGTCTCGGCATGATTGTGACTGGTCACGACGACTCACCCATCATCCCCGTCT  
GCTTTACAACCCCGAAAGATGCCTGCCTCAGTCGCCAGATGCTTGCCCGCAAATCTCCGTTGTC  
GTCGTGCGTTATCCTGCCACTCCGCTCATCAGCTCGCGTGCTCGCTTCTGCGTCTCTGCTGCCACAA  
CAAGGATGACCTCGACCGAATGCTCATTGCCTGTGACGAGGTTGCCGACCTTCTCCAGCTCAAGTAC  
TCCACGGGAATTGCCGGTGGTTTGACCTCTGCCGAGGGCGTCGCACCAGAAGACGAGGCTGAG  
TGGAGGAAGAACAACACTGGCACTCCCATCAAGGCCCCCGATGGAAGGTTGAGGACGTCATTGACGA  
GGTGTGCTGACTGCAAGCTCCCTCTGCGGTGA

>Trichoderma citrinoviride

ATGCCGCGGGCTCGCAAACCCCTTCTCCTCCAGCCAGTCTGCCATGTCAGCGTCCGAAAAGACTG  
GCGAACGACGTCTCTCGTCTCCAAGACCAACCGCTGAGCCAGCTCTTCTCGTCCAGCCCAAAGTC  
CAAGGATCAGGCCACCATGCATCAAAGCCAGACGAGCGCCATTTGCGCGTCCACGGTGTGCTGCC  
CACCATTTGCTGTCCACCGCGACGGGCGAGGCCAACCGGTCGAGCCCACGACGACGCTGTTCAA  
GCCTCAGTCGGCCGAGGAGGTGGAACGGCGGCGACGCACCGAGTCTCAATTCGGTCCCCTGCTCTC  
CCCCGAGCACCTGTACGTCAGCCAGGCCAAGGCAAGCCCTTACGCGCCCGATTGAGGACGAGCC  
GGCCTACTACTATCTCTTGACCACGTACCTGAGCTACCTGGCCCTCATCCTGTTTCGGACACGTCCGCG  
ACTTCTTCGGCAAGCGGTTTCGGTGACCGCAAGCGCTACGCGCCCCTCAAGGTGCACAACGGCTTCGC  
TCCTCTCAATGATGACTTCGACAGCTTCTACAGCAGGCGGCTCAAGTCCGCCTGGACGATTGCTTTG  
CCCGCACCAACCGTCCGCGTCCCCGGGCGCTACATCACCTCAAGGACCGCAAGTCGGACGACTACA  
ACTACACCTACAAATACACCGGTACCCACACTGAGACCCTAAACATGAGTTCCTACAACCTATCTCGGT  
TTTGCTCAGTCGGACGGTCCCTGCGCCGATGCCGTCGAGGAATGCGTCAGGAAGTACGGAGCCACC  
TTTGCCAGCCCTCGAGCTGACAGCGGCACCTCGGATCTGGCCCTCGAGGTCGAGCGCGAAATTGCCT  
CGTTTGTGGAAAGCCCGACGCCATGGTCTTCTCCATGGGCTACGTCACCAATGCCAGCACGTTTCCC  
GCGCTTGTGTCCAAGGGTGCCTGATCATCTCCGACGAGCTGAACCACGCCTCTATCCGAATTGGTG  
CCCGTGTCTCCGGTGCCGTCATCCAGTCTTTCAAGCACAACGACGTCGAGGCCCTGGAGCGCGTCT  
CCGCGAGGCCATCTCGCAGGGCCAGCCAAGGACTCACCGCCCCTGGAAGAAGATCCTCGTCGTTGT  
CGAAGGCCTCTACTCCATGGAAGGCAGCATGGTCAACCTGCCCGCATCCTGGCTCTGAAGCGCAA  
GTACAAGTTCTACCTGTTTCATTGACGAGGCTCACTCCATCGGCGCCCTGGGACCCCGCGGCCGCGG  
ATCTGTGACTACTATGGCGTTGACCCCTCGGAAGTCGACATCCTCATGGGCACCTTGACCAAGTCTTT  
TGCGCCAACGGAGGCTACATCGCCGCTGAGAAGCACATCATCGACAAGTCCGTGTGACCAACGC  
CTCCACCATCTTGGCGAGGCGCCCCGCCCTTCGTTCTCATGCAGATCCTCACGTCTCTGAAGCTCA  
TCAACGGCGAGATCAGCCCCGGCCAGGGTGAAGAGCGCCTGCAGCGCATTGCCTTCAACTCCCCT  
ATCTGCGTCTCGGACTCAAGCGTCTCGGCATGATTGTCACTGGCGACGACGATTACCCATCATTCCC  
GTCCTGCTTTACCACCCCGCAAGATGCCCGCTTTCAGCCGTCTGATGCTTGCCCGCAAGATCTCCGT  
TGTCGTGTCGTTACCCGGCCACTCCGCTCATCAGCTCGCGTGCCCGCTTCTGCGTCTTGCCGCTC  
ACAACAAGGATGACCTCGACCGGATGCTCATTGCCTGCAACGAGGTTGCCGACCTGCTCCAGCTCAA  
GTACTCGACGGGTATTGCCGAGGCTTGAGCCGCTGCCCGAGGGCGTGCCGCTGAAGACGAGG

CCGAGTGGAGGAAGGCCAATGGCATCCCCATCAAGCCTCCCAGGTGGAAGATTGGAGATGTCATTG  
CGCGAGGCGTTGCTGACTGCAAGCTTCCTCTGCGATGA

>*Trichoderma gamsii*

ATGCCGCGACGGCTCGCAAACCCCTTCTCCTCTACCCAGTCTGCTATGTCAGCATCCGAGAAGACTG  
GCGAAAGACGTCTCTCGTCTCCAAGACCAACCGACTGAGCCAGCTCTTCTCCTCCAGCCCAAAGTCC  
AAGGACCAGTCACTACTCGCCGCATGCCGAGAGCCAGATGAACACCATCTCGCCGTGACGGTG  
TCGCTGCCACCATTTGCTGTGACGGCGACCGGCGAGCCCAACAGCATCGAGCCAACCAAGATG  
CTGTTCAAGCCGCAATCGGCCGAGGAGCAAGAGCAGCGACGACTCGCCGAGTCTCAATTTGGCCCC  
CTGCTTGATCCGGCCACCGCTATGTCAGCCAGTCCAATGGCGAGGAGTTCAAGGAGCCGATTGAG  
GATATGCCTCCGTACTTCTATCTCCTGACCACCTACCTGAGCTATCTTCTTGATCATGATGGGCCAT  
TGTCGCGATTATTTTGGCAAGCGTTTTGGAGATAAAAAGCGCTACGACCCCTCAAAGTGCGAAACG  
GGTTCGCCCTCTCACTGATGATTTGACAGCTTCTACACTCGTCGGCTGAAGGGTCGTTTGGATGAC  
TGCTTTGCTCGCCCTACTTTCGGCGTTCCCGGTCGTTACACTCTCAAGGAACGTACGGCAGACAG  
GCTTAACCGCAACTACCTACTGAAACCACGTGAGACACTCAATGTGAGCTCCTACAACACTAC  
CTCGGCTTTGCTCAATCGCAGGGCCCTGTGCCGATGCTGTGATGAATGTGTCAAGAAGTACGGTG  
TTACCGCTGCAAGCCCGCGTGGCGATAGCGGCACTTCCGACCTGGCCCTCGAAGTTGAACGCGAAG  
TTGCAACCTTTGTCGGAAAGCCAGAGGCCATGGTCTTCTATGGGTTACGTTACCAACTCCAGTACC  
TTCCCCGCTCTCGTGTCAAAGGGCTGCCTGATTGTCTCTGACGAACTGAACCATGCCTCCATTCTGTG  
CGGTGCTCGTCTCAGTGGCGCTGTTATCCAGTCTTTCAAGCACAACGACGTGGCCGCCCTGGAGCGC  
GTTCTTCTGTAAGCCATCTCCAGGGCCAGCCAAGGACTCACCGCCCTGGAAGAAGATTCTCGTCG  
TTGTTGAAGGTCTCTATTCTATGGAAGGCACTATGGTTAATCTGCCGGCAATTGTGGCTCTCAAGCG  
CAAGTACAAGTTCTACCTGTACGTTGACGAGGCTCACTCCATTGGTGCCCTGGGACCCCGTGGCCGT  
GGTGTCTGTGATTACTTTGGTATTGATCCCTCCGAGTTGACATCCTCATGGGCACCCTGACCAAGTC  
CTTTGGCGCCAACGGAGGCTACATTGCGGCAGAGAAGCACATCATTGACAAGCTCCGTGCCACCAA  
CGTCTGCTCAATCTATGGCGAAGCCCTTCTCCTTTTGTCTCATGCAGATTCTTACCTCGATCAAGCT  
GATTAACGGCGATATTTCCCCTGGCCAGGGCGAGGAGCGTCTCCAGCGAATTGCCTTCAACTCTCGC  
TATCTTCGCCTTGACTTAAGCGTCTTGGCCTCATCGTTGCTGGCTCTGATGATTCTCCATTATCCCC  
GTTCTGCTGTACAACCCTGAAAGATGCCTGCCTTTAGCCGCGAAATGCTCAAGCGCAACATCTCTG  
TTGTCGTGCTTGGTTACCCGGCTACCCCGCTCATCAGCTCGCGTGCCGTTTCTGCATCTCTGCCGCT  
CACAACAAGGATGACCTTGACCGCATGATCAGAGCTTGCACGAGGTCGGCGAATTGCTTCAGCTC  
AAGTTCTTTCAGGCATTGCTGGCGGCTTGGAGCCGCTGCCTGCTGGTGTAGCACCAGAAAACGAG  
GCTGAGTGGAGGAGGGCCAACAATGTCGCCATCAAGCCTCCTCGATGGGATGTTGAAGAGGTCATT  
CGACGAGGTGCCATCGATTGCAAGCTTCCTCTGCGATAA

>*Trichoderma guizhouense*

ATGCCGCGACGGCTTGCAAATCCCTTCTCCTCCAGCCAGTCTGCCATGTCAGCGTCCGAAAAGACTG  
GCGAACGACGTCTCTCAAGCTCAAAGACCAACCGACTGAGCCAGCTCTTCTCGTCCAGCCCAAAGTC  
CAAGGACCAGGCCACCATGCATCAAAGCCAGATGAGCACCATCTCGCCGTGACGGTGTCACTGCC  
CACCATTTGCTGTCCACTGCGACTGGTGAGTCCAACACCGTTCGAGCCGACCACGACGCTGTTCAAG  
CCTCAGTCGGCCGAGGAGGTGGAGCGACGGCAACGCGTCGAGGCTCAATTTGGCCCGCTACTTTCT  
CCTGAGCACTTGTACACCAGCCAGGCCGAGGCAAGCCCTTTGAGCGGCCGATTGAAGACGAGGCT  
CCATACTACTATCTTTGACCACCTACCTGAGCTACTTGGCGCTCATTCTGTTTGGCCACGTTCTGTGAT  
TTCTTTGGCAAGCGTTTCGGCGACCGCAAACGCTATCAGCCTCTCAAGATTCACAATGGATTGCTC  
CCCTCAATGATGATTTGACAGCTTCTACACCCGACGCCTCAAGACGCGTCTGGACGACTGCTTTGCC  
CGCACCACGGTCGGCGTCCCGGCCGCTTATCACCTCAAGGACCGCAAGTCGGACGACTACAAC  
ACACCTACCGCTACACCGCACCTACACTGAGACGCTAAACATGAGTTCTACAACACTATCTCGGTTTT  
GCTCAGTCTGAGGGTCCCTGTGCCGATGCCGTCGAGGAATGCGTCAAGAAGTACGGAGCCACCTTT  
GCCAGCCCCGAGCTGACAGCGGCACTTCTGATTTGGCTCTCGAAGTCGAGCGGGAAATTGCGTCCT



TTGTTGGAAAGCCCGACGCCATGGTCTTCTCCATGGGCTACGTCACCAACTCCAGCACGTTCCCTGCA  
CTTGTGTCCAAGGGTTGCCTGATCATCTCCGACGAACTGAACCATGCCTCTATCCGAATCGGTGCTCG  
TCTTTCTGGTGTGTCAATCAGTCGTTCAAGCACAACGACATGGGCCACCTCGAGCGTGTCTTCTCGTG  
AAGCCATTTCCAGGGCCAGCCAAGGACTCACCGCCCCTGGAAGAAGATCCTCTTGGTCGTGCAAG  
GTCTCTACTCGATGGAAGGTACCATGGTCAACCTGCCCGAATCCTGGAAGTGAAGCGCAAGTACA  
AGTTTTACCTGTTTATCGACGAGGCTCACTCCATCGGTGCCCTGGGACCCACGGCCGTGGCGTTTG  
CGATTACTATGGCGTTGACACCTCGGAAGTCGACATCCTCATGGGCACTCTGACCAAGTCTTTTGGC  
GCCAACGGAGGCTACATTGCTGCGGAGAAGCACATCATTGACAAGTCCGCAGACCAACGCCTCC  
ACCATCTTTGGCGAAGCCCCTGCCCCCTCGGTTCTCATGCAGATTCTTGCTCCCTCAAGCTGATTAA  
CGGAGATATTTGCCCGGTGAGGGCGAGGAGCGTCTGAAGCGCATTGCCTTAACTCTCGCTACCTC  
CGTCTCGGACTCAAGCGTCTTGGTATGATTGTGACTGGTCACGACGACTCACCCATCATCCCCGTCCT  
GCTTTACAACCCCGGAAGATGCCTGCTTTCAGTCGCCAGATGCTTGCCCGCAAATCTCTGTGCTC  
GTCGTGGGTTATCCCGCCACTCCGCTTATCAGCTCACGTGCTCGCTTCTGCGTCTCTGCTGCCACAA  
CAAGGATGACCTCGACCGAATGCTCATTGCCTGTGACGAGGTTGCCGACCTTCTCCAGCTCAAGTAC  
TCCACAGGAATTGCCGGTGGTTTGGACCCTCTGCCGAGGGCGTCGCACCAGAAGACGAGGCTGAG  
TGGAGGAAGAACAACACTGGCACTCCCATCAAGGCCCCCGATGGAAGGTTGAGGACGTCATCCGACGA  
GGTGTGCTTACTGCAAGCTCCCTCTGCGGTGA

>Trichoderma hamatum

ATGCCGCGACGGCTCCAAAACCCCTTCTCCTCCAACCAGTCTGCTATGTCAGCATCCGAGAAGACTG  
GCGAAAGACGTCTCTCGTCCTCCAAGACCAACCGACTGAGCCAGCTGTTCTCATCCAGCCCAAAGTC  
CAAGGACCAGTACCCCTCGCCGCCATGCATCAAGGCAACACCATCTCGCCATCGACGGTGTGCTG  
CCTACCATCTCCCTGTCTACGGCGACTGGCGAGTCCAACAATGTGCGAGCCAGCCGCAAGATGCTGT  
TCAAGCCTCAATCGGCTGAGGAGCAAGAGCAACGACGACTCGCCGAGTCTCAGTTTGGCCCTCTGCT  
TGATTCATCCCACCGCTACGTGAGCAAGCAGAATGGCGAAGAGTTCAAGGAGCCGGTTGAGGATAT  
GCCTCCCTACTGGTTCCTCTTGACCACCTACATAAGCTATCTTGTGTTAATAATTTTTGGCCACTGTG  
CGATTACTTTGGCAAGCGCTTTGGCGATAAAAAGCGCTACAACGCCCTCAAAGTGCAAAACGGACTC  
GCACCTCTACTGATGACTTCGACAGCTTCTACACCCGCCGTTTGAAGGCCGTCTGGATGATTGCTT  
TGCTCGACCTACTGTGCGGCTTCCCGGCCGCTTACTACTCTCAAGGAACGCACGGCTGACAGACTT  
AACCGCAACTACCACTACACTGGCAACTACGTTGAGACACTCAACGTGAGCTCCTACAACCTACCTCG  
GCTTTGCTCAATCGCAGGGCCCCTGTGCCGATGCTGTCGATGAATGTGTCAAGAAGTACGGTGTAC  
CGCCGCAAGCCCCCGCGGTGACAGCGCACTTCCGACCTGGCCCTTGAAGTTGAGCGCGAAGTTGC  
AGCCTTCTGTTGAAAGCCCGAGGCCATGGTCTTCTCTATGGGTTATGTTACCAACTCCAGTACCTTCC  
CTGCTCTCGCGTCCAAAGGCTGCCTGATTGTCTCTGACGAACTGAACCATGCCTCCATTCTGTGCTG  
GCTCGTCTGAGTGGCGCCGTTATCCAGTCTTCAAGCACAACGACATGACCTCCCTGGAAAAGGTTT  
TTCGTGAAGCCATCTCCAGGGTCAGCCAAGGACTCACCGCCCCTGGAAGAAGATTCTTGTGCTTGT  
CGAGGGTCTCTACTCTATGGAAGGTAATGTTAATCTGCCGGCAATTGTGGCTCTCAAGCACAAG  
TACAAGTTCTACCTGTATGTTGATGAAGCTCACTCTATCGGTGCCCTGGGACCCCGTGGCCGTGGTG  
TCTGCGATTACTTTGGCGTTGATCCCTCCGAGGTTGACATTCTTATGGGTACCCTGACCAAGTCGTTT  
GGCGCCAATGGAGGCTACATTGCGGCTGAGAAGCACATCATTGACAAGTCCGTGCCACAAACGTC  
TGCTCAATATACGGCGAATCTCCTTCCCCCTTGTCTTATGCAGATTCTTACCTCGATCAAGCTTATT  
AACGGCGACATTTGCCCGGTGAGGGCGAGGAGCGTCTTACGGAATCGCCTTCAACTCTCGCTACC  
TTCGTCTTGGACTCAAGCGTCTTGGCTTAATCGTTGCTGGTCTGATGACTCTCCATTATCCCCGTCC  
TGCTCTACAACCCCGGAAGATGCCTGCCTTACGCCGGAATGCTCAAGCGTAACATCTCTGTTGTT  
ATCGTTGGTTACCCGGCTACCCGCTCATCAGCTCGCGTGCCCGCTTCTGCATTTCTGCCGCTCACAA  
CAAAGATGACCTGACCGAATGATTAGGGCTTGTGACGAGGTTGGCGAAATGCTTACGCTCAAGTT  
CTCATCAGGCATTGCTGGCGGCTTGGAGCCGCTGCCCGCTGGTGTGGAACCAGAGAATGAGGCTGA

GTGGAGAAGGGTCAACAATGTCCCCATCAAGCCTCCTCGATGGGATGTTGAGGAGGTCATTCGACG  
AGGCGCCGCCGATTGCAAGCTTCTCTGCGATAA

>*Trichoderma harzianum*

ATGCCGCGACGGCTTGCAAATCCCTTCTCCAGCCAGTCTGCCATGTCAGCGTCCGAAAAGACTGGCG  
AACGACGTCTCTCAACCTCAAAGACCAACCGACTGAGCCAGCTCTTCTCGTCCAGCCCAAAGTCCAA  
GGACCAGGCCGTATGCATCAAAGCCAGATGAGCACCATTCGCCGTCGACGGTGTGCTGCCAC  
CATTCGCTGTCCACTGCGACTGGTGAGTCCAACACCGTCGAGCCGACCACGACGCTGTTCAAGCCT  
CAGTCGGCCGAGGAGGTGGAGCGACGGCGACGCGTCGAGTCTCAATTTGGCCCGCTGCTTTCTCCC  
GAGCACTTGACACCAGCCAGGCCGCGGGCAAGCCCTTTGAGCGGCCGATTGAAGACGAGCCTCCG  
TACTACTATCTCTTGACCACCTACCTGAGCTACTTGGCTCTCATTCTGTTTGGCCACGTTTCGTGATTC  
TTTGGCAAGCGATTGCGCGACCGCAAGCGCTATCTGCCTCTCAAGATTCACAATGGATTCGCTCCCCT  
CAATGATGATTTGACAGCTTCTACACCCGACGCCTCAAGACGCGTCTGGACGACTGCTTTGCCCGC  
ACCACTGTGCGCGTCCCTGGCCGCTTCATCACCTCAAGACCGCAAGTCGGACGACTACAACACTACA  
CCTACCGCTACACTGGCACCTACACTGAGACGCTAAACATGAGTTCCTACAACACTATCTCGGTTTTGCT  
CAGTCTGAGGGTCCCTGTGCCGATGCCGTGAGGAATGCGTCAAGAAGTACGGAGCCACCTTTGCC  
AGCCCCGAGCTGACAGCGCACTTCTGATTTGGCTCTCGAAGTCGAGCGGGAAATTGCGTCCTTTG  
TTGGAAAGCCCGACGCCATGGTCTTCTCCATGGGCTACGTCACCAACTCCAGCACGTTCCCTGCACTT  
GTGTCCAAGGGTTGCTGATCATCTCCGACGAAGTGAACCATGCCTCTATCCGAATCGGTGCTCGTCT  
TTCTGGTGCTGTCATTCAGTCGTTCAAGCACAACGACATGGGCGACCTCGAGCGTGTTCCTCGTGAA  
GCCATTTCTCAGGGCCAGCCAAGGACTCACCGCCCCTGGAAGAAGATTCTCTTGGTGTGCAAGGTC  
TCTACTCGATGGAAGGTACCATGGTCAACCTGCCCGGAATCCTGGAAGTGAAGCGCAAGTACAAGTT  
TTACCTGTTTCATCGACGAGGCTCACTCCATCGGTGCCCTGGGACCCACGCGGTGGCGTTTGGCGAT  
TACTATGGCGTTGACACCTCGGAAGTCGATATCCTCATGGGCACTCTGACCAAGTCTTTCGGCGCCA  
ACGGAGGCTACGTTGCTGCGGAGAAGCACATCATTGACAAGCTCCGCAGCACCAACGCCTCCACCA  
TCTTTGGCGAGGCCCTGCCCTCGGTTCTTATGCAGATTCTTGCCTCCCTCAAGCTGATTAACGGA  
GAGATTTGCCCTGGCCAGGGTGGAGGAGCGCCTGAAGCGCATTGCCTTCAACTCTCGCTACCTTCGCC  
TCGGACTCAAGCGTCTCGGCATGATTGTGACTGGTCACGACGACTCACCCATCATCCCCGTCTGCTT  
TACAACCCCGGAAAGATGCCTGCCTCAGTCGCCAGATGCTTGCCCGCAAATCTCCGTTGTGCTCG  
TCGGTTATCCTGCCACTCCGCTCATCAGCTCGCGTGTGCTGCTTCTGCGTCTCTGCTGCCACAACAAG  
GATGACCTCGACCGAATGCTCATTGCCTGTGACGAGGTTGCCGACCTTCTCCAGCTCAAGTACTCCA  
CGGGAATTGCCGGTGGTTTGGACCTCTGCCCGAGGGCGTCGCACCAGAAGACGAGGCTGAGTGG  
AGGAAGAACACTGGCACTCCCATCAAGGCCCCCGATGGAAGGTTGAGGACGTCATTCGACGAGGT  
GTCGTTGACTGCAAGCTCCCTCTGCGGTGA

>*Trichoderma parareesei*

ATGCCGCGGGCGGCTCGCAAACCCCTTCTCCTCCAGCCAGTCTGCCATGTCAGCGTCCGAAAAGACTG  
GCGAACGACGTCTCTCGGCCTCAAGACCAACCGGTTGAGCCAGCTCTTCTCGTCCAGCCCAAAGTC  
CAAGGACCAGGCCGATGCATCAAAGCCAGATGAGCACCCTCGCCGTCCACGGTGTGCTGCTGCC  
CACCATTTGCTGTCCACCGCGACGGGCGAGCCCAACACGGCCGAGCCACCACGACGTTGTTCAAG  
CCTCAGTCGGCCGAGGAGGTGGAGCGACGACGACGCGCCGAGTCTCAATTCGCTCCGCTGCTCTCC  
CCGGAGCACCTGTACGTCAGCCAGGCCATGGCAAGCCCTTACGCGGCCGATTGAGGACGAGCCG  
GCCTACTACTATCTTAAACCACGTATCTGAGCTACCTGGCTCTCATCCTGTTTGGACACGTCCGCGAT  
TTCTTTGGCAAGCGTTTCGGCGACCGCAAGCGCTACGCGCCCTCAAGGTGCACAACGGCTTCGCTC  
CTCTCAACGATGACTTCGACAGCTTCTACAGCAGGCGGCTCAAGCTCCGCCTGGACGATTGCTTTGC  
CCGACCACTGTGCGCGTCCCGGTGCTACATCACCTCAAGGACCGCAAGTCGGACGACTACAAC  
TACACCTACCGTTACACCGGCACCCACACTGAGACCCCTAAACATGAGTTCCTACAACACTATCTCGGTTT  
TGCTCAGTCGGACGGTCCCTGCGCCGATGCCGTGAGGAATGCGTCAGGAAGTACGGAGCCACCTT  
TGCCAGCCCCCGAGCTGACAGCGCACTTCGGATCTGGCCCTCGAGGTCGAGCGCGAAATCGCCTC

GTTTGTGGAAAGCCCGACGCCATGGTCTTCTCCATGGGCTACGTCACCAATGCCAGCACGTTCCCT  
GCGCTCGTGTCCAAGGGCTGCCTGATCATCTCGGACGAGCTCAACCACGCCTCTATCCGAATCGGTG  
CCCGTGTTTCCGGTGCCGTTATCCAGTCTTTCAAGCACAACGACGTCGAGGCCCTGGAGCGCGTCT  
CCGCGAGGCCATCTCCAGGGCCAGCCAAGGACTCACCGCCCCTGGAAGAAGATCCTCGTCTGTGT  
CGAAGGCCTCTACTCCATGGAAGGCAGCATGGTCAACCTGCCCGGCATCCTGGCTCTGAAGCGCAA  
GTACAAGTTCTACCTGTTTCATCGACGAGGCTCACTCCATTGCGGCCCTGGGACCCCGCGGCCGCGG  
ATCTGTGATTACTACGGCGTCGACCCTTCGGAGATTGACATCCTCATGGGCACCTTGACCAAGTCCT  
CGGCGCCAACGGAGGCTACATCGCCGCTGAAAAGCACATCATCGACAAGCTCCGTGTGACCAATGC  
CTCCACCATCTTTGGCGAAGCGCCTGCCCTTCGGTTCTCATGCAGATCCTCACGTCCCTGAAGCTCA  
TCAACGGCGAGATCAGCCCCGGCCAGGGTGAAGAGCGCCTGCAGCGCATTGCCTTCAACTCTCGCT  
ATCTCCGCCTCGGACTCAAGCGTCTCGGCATGATTGTCCTGGCGACGACGATTACCCATCATCCCT  
GTCCTGCTTTACCACCCGGCAAGATGCCCGCCTCAGCCGTCTGATGCTCGCCCGCAAGATCTCCGT  
CGTCGTGTCGGGTACCCGGCCACTCCGCTCATCAGCTCGCGTGCTCGCTTCTGCGTCTCTGCCGCT  
ACAACAAGGATGACCTCGACCGGTTGCTCATCGCCTGCGACGAGATTGCCGACCTGCTGCAGCTCA  
GGTACTCGACAGGTATTGCCGGAGGCTTGAGCCGCTTCCCGAGGGAGTGCGCCCCGAGGACGAG  
GCCGAGTGGAGGAAGGCCAATGGCATTCCCATCAAGCCCCCAGGTGGAAGGTTGAGGATGTCATT  
GCGCGAGGCGTCTGACTGCAAGCTTCCCCTGCGATGA

>*Trichoderma reesei*

ATGCCGCGGCGGCTCGCAAACCCCTTCTCCTCCAGCCAGTCTGCCATGTCAGCGTCCGAAAAGACTG  
GCGAACGACGTCTCTCGGCCTCCAAGACCAACCGGTTGAGCCAGCTCTTCTCGTCCAGCCCAAAGTC  
CAAGGACCAGGCCGCCATGCATCAAAGCCAGATGAGCACCGTCTCGCCGTCCACGGTGTGCTGCC  
CACCATTTGCTGTCCACCGCGACGGGCGAGCCCAACACGGCCGAGCCCACCACGACGCTGTTCAA  
GCCTCAGTCGGCCGAGGAGGTGGAGCGACGACGACGCGCCGAGTCTCAATTGCTCCGCTGCTCTC  
CCCGGAGCACCTGTACGTCAGCCAGGCCATGGCAAGCCCTTACGCGGCCGATTGAGGACGAGCC  
GGCCTACTACTATCTCTTGACCACGTACCTGAGCTACCTGGCTCTCATCCTGTTTGGACACGTCCGCG  
ATTTCTTTGGCAAGCGGTTTGGCGACCGCAAGCGCTACGCGCCCCTCAAGGTGCACAACGGCTTCG  
TCCTCTCAACGATGACTTCGACAGCTTCTACAGCAGGCGGCTCAAGTCCGCCTGGACGATTGCTTT  
GCCCCACCACTGTCGGCGTCCCCGGCCGCTACATCACCTCAAGGACCGCAAGTCGGACGACTACA  
ACTACACCTACCGTTACACCGGCACCCACACTGAGACCCTAAACATGAGTTCCTACAACATCTCGGT  
TTTGCTCAGTCGGACGGTCCCTGCGCCGATGCCGTGAGGAATGCGTCAGGAAGTACGGAGCCACC  
TTTGCCAGCCCCCGGGCTGACAGCGGCACTTCGGATCTGGCCCTCGAGGTCGAGCGCGAAATCGCC  
TCGTTTGTGGAAAGCCCGACGCCATGGTCTTCTCCATGGGCTACGTCACCAATGCCAGCACGTTCC  
TGCGCTTGTGTCCAAGGGCTGCCTGATCATCTCCGACGAGCTCAACCACGCCTCATTGCAATCGGT  
GCCCCTGTTTCCGGCGCCGTATCCAGTCTTTCAAGCACAACGACGTCGAGGCCCTGGAGCGCGTCC  
TCCGCGAGGCCATCTCCAGGGCCAGCCAAGGACTCACCGCCCCTGGAAGAAGATCCTCGTCTGTGT  
CGAAGGCCTCTACTCCATGGAAGGCAGCATGGTCAACCTGCCCGGCATCCTGGCTCTGAAGCGCAA  
GTACAAGTTCTACCTGTTTCATCGACGAGGCTCACTCCATCGGCGCCCTGGGACCCCGCGGCCGCGG  
ATCTGTGATTACTACGGCGTCGACCCTTCGGAGATTGACATCCTCATGGGCACCTTGACCAAGTCCT  
CGGCGCCAACGGAGGCTACATCGCCGCCGAGAAGCACATCATCGACAAGCTCCGTGTGACCAACGC  
CTCCACCATCTTCGGCGAGGCGCCTGCCCTTCGGTTCTCATGCAGATCCTGACGTCCCTGAAGCTCA  
TCAACGGCGAGATCAGCCCCGGCCAGGGTGAAGAGCGCCTGCAGCGCATCGCCTTCAACTCTCGCT  
ATCTCCGCCTCGGACTCAAGCGTCTCGGCATGATTGTCCTGGCGACGACGATTACCCATCATCCCT  
GTCCTGCTTTACCACCCGGCAAGATGCCCGCCTCAGCCGCTGATGCTCGCCCGCAAGATCTCCGT  
CGTCGTGTCGGTTACCCGGCCACTCCGCTCATCAGCTCGCGTGCTCGCTTCTGCGTCTCTGCCGCC  
ACAACAAGGATGACCTCGACCGGTTGCTCATCGCCTGCGACGAGATTGCCGACCTGCTGCAGCTCA  
GGTACTCGACGGGTATTGCCGGAGGCTTGAGCCGCTTCCCGAGGGCGTGCGCCCCGAGGACGAG

GCCGAGTGGAGGAAGGCCAATGGCATTCCCATCAAGCCCCCAGGTGGAAGGTTGAGGATGTCATT  
GCGCGAGGCGTCGCTGACTGCAAGCTTCCCCTGCGATGA

>*Trichoderma virens*

ATGCCGCGACGGCTTGCAAATCCCTTCTCCTCCAGCCAGTCTGCCATGTCAGCGTCCGAAAAGACTG  
GCGAACGACGTCTCTCAACCTCCAAGACCAATCGACTGAGCCAGCTCTTCTCGTCCAGCCCAAAGTC  
CAAGGACCAGGCCGCCATGCATCAAAGCCAGATGAGCACCATCTCGCCGTCCACGGTGTGCTGCTGCC  
CACCATTTGCTGTCCACTGCGACTGGTGAAGTCCAACGCCGTGAGCCGACCACGACGCTGTTCAAG  
CCTCAGTCGGCCGAGGAGGTGAGCGACGGCGACGCGTCGAGGCTCAATTTGCCCGCTGCTTTCT  
CCTGAGCACCTGTACACCAGCCAGGCTCATGGCAAGCCCTTTACGCGGCCGATTGAGGACGAGCCT  
CCGTACTACTATCTTTGACCACCTACCTGAGCTACTTGGCACTCATCCTGTTTGGCCACGTTGCTGAT  
TTCTTTGGCAAGCGATTGCGCGACCGCAAGCGTTACCTGCCTCTCAAGGTGCACGGTGGATTGCGCGC  
CTCTCAATGATGATTTGACAGCTTCTACAGCAGACGCCTGAAGCTCCGTCTGGACGACTGCTTTGCC  
CGCACCACCGTCGGCGTTCCCAGGCCGTTTATCACCCCTCAAGGACCGCAAGTCGGATGACTACAAC  
ACACCTACCGCTACACCGGTACCCACACTGAGACGCTAAACATGAGTTCCTACAACCTATCTCGGTTTT  
GCTCAGTCTGAGGGTCCCTGCGCCGATGCCGTTGAGGAATGCGTCAAAAAGTACGGAGCCACCTTT  
GCCAGTCCCCGATCTGACAGCGGCACTTCCGATTTGGCCCTCGAGGTCGAGCGGGAGATTGCGTCTT  
TTGTTGGAAGCCCCGACGCCATGGTCTTTTCGATGGGCTACGTCACCAATGCCAGCACGTTCCCTGC  
GCTTGTGTCCAAGGGCTGCTTGATCATCTCCGACGAGCTGAACCATGCCTCTATCCGAATCGGCGCT  
CGCCTTTCTGGTGCCGTATCCAGTCTTCAAGCACAACGACATGGACGATCTGGAGCGTGTCTCC  
GTGAGGCCATTTCCAGGGCCAGCCAAGGACTCACCGCCCCTGGAAGAAGATCCTCGTGGTCTGTTG  
AAGTCTTTACTCTATGGAAGGCACCATGGTCAACCTGCCCGGAATTCTGGAACCTGAAGGGCAAATA  
CAAGTTTTACCTGTTTATTGATGAGGCTCACTCCATCGGTGCCCTGGGGCCCCGCGGCCGTGGCGTC  
TGTGATTACTATGGCGTTGACACTGCTGAGGTCGACATTCTCATGGGTACTCTGACCAAGTCTTTGCG  
CGCCAACGGAGGCTACATTGCTGCGGAGAAGCACATCATTGACAAGCTCCGTGCCACCAACGCCTCC  
ACCATCTTTGGCGAGGCCCTGCCCTTCGGTTCTCATGCAGATTCTTGCCTCTCTCAAGCTGATTAAC  
GGCGACATCTGCCCTGGCCAGGGTGAGGAGCGCCTGAGGCGCATTGCCTTCAACTCTCGCTATCTTC  
GTCTTGGACTCAAGCGTCTTGGTATGATTGTGACTGGTCACGACGACTCACCCATCATCCCCGTCCTG  
CTTTACAACCCCGGAAAGATGCCTGCTTTAGTCGCCAAATGCTTGGCCGTAAGGTCTCCGTGCTGCT  
CGTCGGTTATCCCGCCACCCGCTCATCAGCTCGCGTGCTCGCTTCTGCGTCTCTGCCGCTCACAACA  
AGGATGACCTCGACCGAATGCTCATTGCCTGCGATGAAGTTGCCGACCTGCTCCAGCTCAAGTACTC  
TACCGGAATTGCTGGTGGCTTGGAGCCTTCCCCGACGGGTCGACACCAGAAGACGAGGCTGAGTG  
GAGGAAGAACACCGGCACCCCCATCAAGGCTCCCCGATGGAAGATTGAGGACGTCATTGACGAG  
GCGCCGTTGACTGCAAGCTCCCTCTGCGATGA

---

**Appendix S5.** *rpb2* cds retrieved from the genomes of the 13 species analyzed in the present work

>Trichoderma arundinaceum

```
ATGGCTGACTACGAGGACGACTACGACTACGAGAACTATGGAGACGAGGATGAAGGCATCACCCCC
GAGGATTGCTGGACTGTGATCTCCTCATTCTTTGAGACAAAGGGTCTCGTATCACAAACAGACCGACT
CCTTTGACGAGTTCACTCAGACGACGATTCAGGATCTTGTAACGAATACTCCACCATCACACTCGAT
CAGCCAAATCCTCCTTCGCCACCCGGCCGAACGATAGCCCTCCGTCGATATGAGATCAAGTTTGGAA
GCGTCATGGTGTACGCCCCACTATCAGTGAGACGGACGGAAGTGTGACTTCTCTGCTTCCCTATGA
GTGTCGAGACCGCAACTTGACGTACGCCAGTCCGCTGTACATCAAGATCACCAAAAAGGTATCCGCT
GCCGTCGAGAGGGAGGTGCCCTCCACGAAATGGACGATGCTCAGCAGGAGGAATATGCAAGGAC
CGGCGACCATCCTACAAAGCTTGAGTGGGAGGAGGAGGAGAATGGCGAAGACGACAATATCGGCA
AGTCTGATGACTGGAAGGACATGGTCTTTGTTGGCAAAGTCCCATCATGGTCAAATCCAAGATTTG
CCATCTGAGCCGTGAACAGGATGATAGTCTGTTCTTGTCAACGAGTGTCCCTATGATCAAGGTGGC
TATTTTCGTTATCAACGGTAGTGAGAAGGTTCTCATCGCTCAAGAGCGATCCGCCGCCAACATTGTCC
AAGTATTCAAGAAGGCCAGCCAGTGCCTACACATACACCGCTGAAATTCGAAGTGC GTTGGAAA
AGGGTTCACGGCTTATCTCTAGCATGATGCTCAAGTTGTACGGCAAGGGAGACTCTGCACGAGGTG
GCTTTGGCCAGACGATCCACACCACTCTCCCCTTTGTCAAGTCAGATCTTCCCGTTGCCATTGTTTTCC
GTGCCTTGGGTGTCGTTTCTGATGAGGACATTCTGAACCACATTTGCTACGACCGAAACGACAGCCA
GATGCTAGAAATGCTTCGGCCGTGTATCGAGGAGGCCTTTTGTGTTCAAGACCGAGAGGTTGCTCTT
GACTTCATCGGAAAGCGAGGCAATCGCGACCAAGCTGGTCTCGGTCGTGAGAAGCGTGTCCGTGTG
GCTAAGGACATTCTTCAAAAAGAGACCCTTCTCACATTTCTCAGACGGAAGGCAGTGAAACCAGAA
AGGCATTCTTCTGGGATACATGGTCCACAAGCTGTTGCAATGCGCTCTCGGAAGACGTGAGCCCGA
CGATCGTGACCACTTTGGAAAGAAGCGTCTGGATCTGGCGGGTCCCCTGCTAGCTAAGCTGTTCCGT
GGTATCATGCGAAGGATGAACACCGAGTTGGCCAATTATCTGAGACGTTGTGTGGAGGGCAACCGA
CATTTCAACCTTGCTGTGGGTATCAAGCCCGGCACGCTTTCAAACGGTCTGAAGTATTCTTTGCCAC
TGAAACTGGGGTGACCAGAAGAAGGCCATGAGCTCGACCGCAGGTGTGTCTCAGGTGCTCAATC
GCTACACTTTTGCTTCGACCCTGTACATTTGCGTCGTACCAACACACCCATCGGAAGAGATGGTAA
GCTGGCGAAGCCTCGACAGCTTATAATACGCATTGGGGTCTGGTCTGCCAGCCGAGACACCTGA
AGGCCAAGCTTGTGGTTTGGTCAAAAAGTGTCTTTGATGTGCTACGTCAGTGTCCGATCTCCTTCCG
AACCCCTGATCGAGTTCATGATCAACAGAGGTATGGAGGTCGTGCAAGAGTATGAGCCGTTGCGGT
ATCCCCACGCTACGAAGATCTTTGTCAACGGTGTATGGGTGGGAGTTCATCAAGATCCCAAGCACCT
GGTGAACCAGGTTCTGGACACTCGTCGCAAATCCTATCTGCAGTATGAAGTCTCCCTGATCAGGGAC
ATTCGTGACCAGGAATTCAAAATCTTCTCCGACGCAGGTCGTGTTATGCGTCCCGTCTTTACTGTTCA
GCAAGAAGACGACCCAGAAACTGGCATTATAAGGGCCATTTGGTTTTGACAAAGGAGCTGGTCAA
CAGGCTGGCAAAGGAGCAGGCCGAGCCTCCGGAGGACCCGAGCATGAAGATTGGATGGGAGGGG
TTAATTAGGGCTGGTGCGGTTGAATATCTCGATGCCGAGGAAGAAGAGACGGCAATGATTTGCATG
ACCCCGAGGATCTCGAGCTTATCGTCTTCAGAAAGCTGGTATATCCACAGAAGAAGACATGGCAG
ATGATCCAAACAAGCGACTCAAGACGAAGACGAATCCAACAACACTCACATGTACACGCATTGTGAGA
TTCACCCGAGTATGATCTTAGGCATCTGTGCTAGTATCATTCTTTCCCTGATCACAACCAGTCCCCC
GTAACACCTACCAATCTGCCATGGGTAAACAAGCCATGGGCTTCTTCCCTAACTAACTATTCTCGGCGT
ATGGATACCATGGCCAACATTCTCTACTATCCCCAGAAGCCGCTGGGCACCACCCGTTCTATGGAGT
TTTTGAAATTCCGTGAACTGCCAGCTGGACAGAATGCCATTGTAGCCATTGCTTGTACTCTGGCTAC
AATCAAGAAGATTCCGTCAATTATGAACCAGAGTAGTATCGACAGAGGTCTCTCCGAAGTTTGTCTT
CCGATCATACTCGGATCAGGAGAAGAAGGTTGGGTTGAACTACACTGAAGTGTGGAGAAGCCATT
CCACCAGAATACCCTTCGTATGAAGCACGGTACATATGACAAGCTAGACGAAGATGGTATCGTTGCT
CCTGGCGTTCGAGTGTCCGGTGAAGACATCATCATCGGCAAGACTGCGCCAATTGATGCAGAGACA
```

CAGGATCTTGGCACCAGGACGACCATGCACCAGAGGCGTGATATCTCAACGCCTCTGCGCAGTACT  
GAGAACGGTATCGTTGATTCCGTCATCGTGACGGTGAACGCGGACAATGTCAAGTATGTCAAGGTC  
CGTGTTCAACGACCAAGATTCCCCAGATTGGAGACAAGTTTGCCTCTCGTCACGGTCAGAAGGGC  
ACTATTGGTGTACCTACCGACAAGAGGATATGCCGTTACAAGGGAAGGCGTTACCCCCGACATCA  
TCATCAACCCTCACGCCATTCCATCTCGTATGACAATTGCTCACTTGATTGAGTGTCTCCTGAGTAAG  
GTCTCTACGTTGGAAGGTATGGAGGGGCGATGCCACCCCTTCACGGACGTAACGGTCTGACTCGGTC  
TCAGAGCTTCTGCGAAAGCACGGCTACAGTCGCGAGGTTTTGAGATTATGTACAATGGTCATACAG  
GTCGCAAGCTGAGAGCACAAGTGTCTTCGGGCCAACGTACTACCAGCGACTGCGCCACATGGTGG  
ATGACAAGATCCATGCCCCGAGCTCGTGGTCCCGTGCAGATCATGACCAGACAGCCAGTGGAGGGTC  
GTGCCCGAGACGGTGGTCTCCGATTCCGAGAAATGGAACGTGATTGTATGATTGCACACGGTGCAG  
CATCTTTCCTCAAGGAGCGATTGTTTGAGGTGTCAGACGCATTCCGAGTCCACATTTGCGAGATTTGT  
GGACTCATGACACCTATTGCTAACCTCTCCAAGCAATCGTTCGAGTGCCGACCATGCAAGAACAAGA  
CCAAGATTGCGCAGATTCATATCCCTTACGCTGCCAAGCTCTTGTTCAGGAGCTACAGTCTATGAAC  
ATTGCGGCCAGAATGTTCAAAACCGTCCGGCGCGTCCGTTAGGTAG

>*Trichoderma asperellum*

ATGGCTGATTACGAAGACGATTACGATTATGAGAACTATGGGGATGAGGATGAGGGCATCACGCC  
GAGGATTGCTGGACCGTGATTTCTCTTTCTTCGAGACCAAGGGTCTCGTATCGCAGCAGACCGACT  
CCTTTGACGAGTTTACTCAGACGACCATCCAGGATCTCGTTAACGAATACTCCACCATCACGCTCGAT  
CAGCCCAATCCTCCTTCGCCACCTGGTCAACGATAGCCCTTCGCCGATATGAAATCAAATTTGGAA  
GCGTCATGGTATCACGCCCCACTATCAGCGAAACAGATGGAAGTGTGACATCTTTGCTTCCTTACGA  
ATGCCGAGACCGTAACTTGACCTACGCCAGTCCGCTCTACATCAAAATCACCAAAAAGGTGTCTGCG  
GCTGTGCGAAAGAGAGGTTCCGCTGCACGAGATGGACGATGCCAGCAAGAACAGTATGCAAGGAC  
CGGAGAGCACCTACAAAGTTGGAATGGGAAGAGGAAGAAAATGGCGAAGACGACAATCTCGGCA  
AGTCTGACGACTGGAAGGACATGGTTTTCGTTGGCAAGCTGCCCATCATGGTCAAATCCAAGATTTG  
TCATCTGAGCCGTGAACAGGATGATAGCCTGTTCTTGTCAACGAGTGCCCTTACGACCAAGGTGGA  
TATTTGTCATCAACGGTAGTGAAAAGGTCTCATTGCCAAGAGCGCTCCGCCGAAACATCGTCC  
AGGTCTTCAAGAAGGCCAGCCAGTGTATACTACACGGCCGAAATCCGAAGTGCAGTGGAAA  
AGGGATCTGACTCATCTCTAGCATGATGCTCAAGTTGTATGGCAAAGGAGACTCTGCGCGAGGTG  
GTTTTGGACAGACCATTACACAACCCTGCCTTTTGTCAAGTCAGATCTTCCCGTCGCCATTGTTTTCC  
GTGCCTTGGGTGTGTTTTCTGATGAAGACATTCTGAATCACATTTGCTACGATCGAAACGACAGCCA  
AATGCTTGAATGCTTCGGCCCTGTATTGAAGAAGCCTTCTGCGTCCAGGATCGAGAAGTTGCTCTC  
GATTCATCGGAAAGCGAGGCAACCGTGATCAAGCTGGCCTCGGTCTGAGAAGCGTGTTCGTGTA  
GCGAAGGACATTCTCCAGAAGGAGACGTTCCCCACATTTCCAGACTGAAGGTAGCGAGACGAGA  
AAGGCATTCTTCTCGGATACATGGTGCACAAGCTATTGCAATGCGCACTTGAAGACGAGAGCCC  
GATGACCGAGATCACTTCGAAAGAAGCGTCTGGATCTGGCTGGTCCACTGCTGGCCAAGCTGTTC  
CGTGGTATCATGCGTAGAATGAACACCGAGTTGGCCAACCTGAGACGATGTGTTGAGGGTAAC  
CGTCACTTCAACCTGGCTGTTGGCATCAAGCCCGCACACTCTCAACGGATTGAAGTATTCTCTCGC  
CACCGGAAACTGGGGTGACCAGAAGAAGGCAATGAGCTCGACCGCAGGTGTATCACAGGTGCTTA  
ACCGTTACATTTTCTTCGACACTTTCTCATTTGCGTCGTACCAATACACCCATCGGAAGAGATGGT  
AAGCTGGCGAAGCCTCGACAGCTTCAACACACACTGGGGTTTTGGTATGCCCGGCCGAGACCCCT  
GAGGGACAGGCTTGTGGTTTTGGTCAAAAATTGTCTCTGATGTGCTACGTAGTGTGCGATCTCCTT  
CCGAGCCTTTGATCGAGTTTATGATCAACAGAGGTATGGAGGTGTTGAGGAGTACGAACCGCTGA  
GGTATCCCATGCGACAAAGATTTTTGTGAATGGTGTCTGGGTTGGAATCCACCAAGACCCCAAGCA  
TCTGGTAAACCAAGTTTTGGACACTCGTCGTAATCCTATCTGCAATACGAAGTCTCTCTGATCAGAG  
ATATTCGTGACCAAGAATTCAAAATCTTCTGACGCCGTCGTGTTATGCGTCTGTCTTTACTGTA  
CAGCAAGAGGATGACCCGAAACGGGCATCAACAAGGGCCACCTGGTTTTAAACCAAGGATCTTGT  
AATAGACTGGCCAAAGAGCAGGCTGAGCCTCCGGAAGACCCAAGCATGAAGCTTGGATGGGAAGG

GTTAATTCGGGCTGGTGCGGTGAATATCTCGATGCTGAGGAAGAAGAAACGGCTATGATTTGCAT  
GACACCGGAGGATCTTGAGCTTTACCGTCTTCAGAAGGCTGGCATTGCCACAGATGAAGACATGGG  
AGACGATCCAAACAAGCGTCTCAAGACCAAGACAAATCCGACAACCTCACATGTACACGCATTGCGA  
GATTCACCCGAGTATGATCTTAGGTATCTGTGCTAGTATCATTCCCTTTCCCCGATCACAACCAGTCCCC  
CCGTAACACCTACCAATCTGCCATGGGTAAACAAGCCATGGGCTTCTTCTTGACCAACTATTCTCGGC  
GTATGGACACCATGGCCAATATCCTCTACTACCCTCAGAAACCGCTGGGCACCACTCGGTCTATGGA  
GTTCTTGAAATTCCGTGAGCTGCCAGCCGGACAAAACGCCATTGTAGCAATTGCTTGTTACTCTGGTT  
ATAACCAAGAAGATTCCGTCATTATGAACCAGAGTAGTATTGACAGAGGTCTCTCCGAAGTCTTTTC  
TTCCGATCATATTCAGATCAGGAGAAAAAGTTGGCTTGAACACTACACGGAAAGTGTGGAGAAGCCAT  
TCCACAAAACACCCTTCGTATGAAGCACGGCACATATGATAAGCTGGATGAAGATGGTATCGTTGC  
TCCTGGTGTCCGAGTGTGAGGTGAGGATATCATCATCGGCAAGACGGCGCCAATCGACCCCGAGAC  
CCAGGATCTTGGAACCAGGACGACCATGCACCAGAGACGCGATATCTCAACGCCTCTGCGAAGTAC  
CGAGAACGGTATCGTTGACCAGGTCATCGTACGGTGAACGCGGACAATGTTAAGTATGTCAAGGT  
CCGTGTTGAAACGACCAAGATTCCCCAGATTGGAGACAAGTTTGCTTCTCGTACGGTCAGAAGGGC  
ACTATTGGTGTACTTACCGACAGGAGGATATGCCTTTCACAAGAGAAGGTCTCACTCCAGATATCA  
TTATCAACCCCCACGCCATTCCGTCTCGTATGACAATTGCTCACTTGATTGAGTGTCTCCTCAGTAAG  
GTCTCTACGTTGGAAGGTATGGAGGGTGATGCTACTCCCTTCACGGATGTCACGGTCGACTCAGTCT  
CTGAGCTCTTGCGAAAGCACGGTTACCAGTCTCGAGGTTTCGAGATTATGTACAACGGCCATACTGG  
CCGCAAGCTAAGAGCACAAGTGTCTTTGGACCAACATACTACCAGCGACTCCGTACATGGTGGAT  
GACAAGATCCATGCCAGAGCTCGCGGTCTGTGCAGATCATGACAAGACAGCCGGTGGAGGGTTCGT  
GCTCGAGATGGTGGTCTCCGATTCGGAGAAATGGAACGTGATTGTATGATTGCACACGGTGCGGCG  
TCCTTCTCAAGGAGCGATTGTTTGAGGTGTGCGACGCCTTCAGAGTTCACATTTGCGAGATTTGTG  
GACTCATGACACCCATTGCTAACTTATCCAAACAATCGTTGAGTGCCGGCCATGCAAGAACAAGAC  
TAAGATTGCACAGATTCACATTCCTTATGCTGCCAAGCTCTTGTTCCAAGAGCTCCAGTCTATGAACA  
TTGCAGCTAGAATGTATACAAACCGATCTGGTGCATCTATCCGATAG

>Trichoderma atrobrunneum

ATGGCTGACTACGAGGACGAATACGACTACGAGAACTACGGAGACGAGGATGAAGGCATCACTCC  
CGAGGATTGCTGGACCGTCACTCCTCCTTCTCGAAACCAAGGGTCTTGATCGCAGCAGACCGAC  
TCCTTTGACGAATTCACCCAGACCACGATCCAGGATCTCGTAAACGAATACTCCACCATCACACTCGA  
CCAGCCGAACCCTCCTTCGCCACCCGGTCGAACAATAGCCCTTCGTCGATATGAGATCAAGTTTGA  
AGCGTCATGGTTTACGTCCTTATCAGCGAGACGGACGGAAGTGTGACTTCTCTGCTCCCTTATG  
AGTGCCGAGACCGCAACTTGACCTACGCCAGTCCCCTCTATATCAAGATTACTAAAAAGGTGTGCGC  
TGCCGTCGAGAGAGAGGTTCCCTGCACGAAATGGACGATGCTCAGCAGGAAGAATACGCAAGAA  
CCGGCGAACACCCTACAAAGCTTGAGTGGGAAGAGGAGGAGAACGGCGAAGATGACAACATCGGC  
AAGTCTGATGATTGGAAGGACATGGTCTTCGTTGGCAAGCTGCCCATCATGGTCAAATCCAAGATTT  
GTCATCTGAGCCGTGAACAGGATGACAGCCTGTTCTTGTCAACGAATGTCCCTACGATCAGGGTGG  
CTACTTTGTTATCAACGGCAGTAAAAGGTTCTCATCGCCAAGAGAGATCTGCCGCAAACATTGTC  
CAAGTCTTCAAAAAGGCCAGCCAGTGCCTATACTATACGGCTGAAATCCGAAGTGCCTGGAAA  
AGGGCTCACGGCTCATCTCCAGCATGATGCTCAAGCTGTATGGCAAGGGAGACTCTGCTCGTGGTG  
GCTTTGGCCAAACTATCCACACCACCCTGCCCTTGTCAAGTCAGATCTTCCCGTCGCCATTGTCTCC  
GTGCCCTAGGTGTGTTTTCTGATGAAGATATCCTCAACCACATTTGCTACGACCGCAACGACAGCCA  
GATGCTGGAGATGCTTCGACCTTGATTGAGGAGGCCTTTTGTGTTTCAGGACCGAGAGGTTGCTCTC  
GATTCATCGGAAAGCGTGGAAACCGAGACCAAGCTGGTCTCGGACGTGAGAAGCGTGTCCGCGT  
GGCCAAGGATATCCTTCAGAAGGAGACTCTTCTCACATTTACAGACAGAGGGAAGTGAACCCAG  
AAAGGCATTCTTCTGGGATACATGGTGCACAAGCTGTTGCAATGTGCGCTCGGAAGAAGAGAGCC  
TGACGATCGTGACCACTTTGGAAGAAGCGTCTGGATCTGGCCGGTCCCCTGCTGGCCAAGCTGTT  
CGTGGTATCATGCGAAGGATGAACACTGAGTTGGCCAACCTGAGACGATGCGTTGAGGGCAAC

CGACATTTCAACCTTGCTGTTGGTATCAAGCCCGGCACGCTTTCAAACGGATTGAAGTATTCGCTTGC  
CACAGGCAACTGGGGTGATCAGAAGAAGGCCATGAGCTCAACTGCAGGTGTGTCCCAGGTGCTTAA  
CCGTTACACGTTTGTTCGACCTTGTGCGATTTGCGTGTACCAATACTCCTATCGGAAGAGATGGTA  
AGCTGGCAAAGCCTCGACAGCTTACAACACGCATTGGGGTTTGGTCTGCCAGCCGAGACACCCG  
AAGGACAGGCTTGTGGTCTGGTCAAGAAGTGTCTTTGATGTGTTACGTGAGTGTGCGTTCTCCCTCT  
GAACCTCTCATTGAGTTCATGATCAACAGAGGTATGGAAGTCGTGGAAGAGTACGAGCCTCTGCGG  
TATCCTCATGCTACAAAGATTTTTGTGAACGGTGTCTGGGTTGGAGTCCACCAAGACCCTAAGCACTT  
GGTGAACCAGGTTCTGGACACTCGTCGCAAGTCCTATCTGCAATACGAAGTCTCTCTCGTGAGAGAA  
ATTCGAGACCAGGAATCAAATCTTTCCGACGCTGGCCGTGTCATGCGACCAGTCTTTACCGTTCA  
ACAGGAAGATGACCCGGAAACGGGCATCAACAAGGGCCACCTGGTATTGACCAAGGAGCTCGTCA  
ATAGATTGGCCAAGGAGCAGGCTGAGCCTCCGGAAGACCCAGCATGAAGATTGGATGGGAGGGA  
TTGATCAGGGCTGGTGCAGTTGAATATCTCGACGCCGAGGAAGAGGAGACGTCCATGATCTGCATG  
ACGCCAGAGGATCTCGAGCTGTATCGTCTTCAGAAGGCCGGTATTAACACTGAGGAAGACATGGGA  
GATGACCCGAACAAGCGACTAAAGACCAAGACCAACCCGACAACCTCACATGTACACCCATTGCGAG  
ATTCACCCAAGTATGATCTTAGGCATCTGTGCTAGTATCATTCTTTCCCGATCACAACCAGTCCCC  
CGTAACACTTACCAATCTGCCATGGGTAAGCAAGCTATGGGTTTCTCCTCACGAACTATTCCCGGCG  
CATGGACACCATGGCCAACATCTTTACTACCCCAAGGCCGCTGGGTACCACTCGATCTATGGAG  
TTTTTGAAATCCGAGAGTTGCCTGCTGGACAGAACGCCATTGTAGCCATTGCCTGTTACTCTGGTTA  
CAACCAGGAAGATTCCGTCATTATGAACCAAGTAGTATTGACAGAGGTCTGTTCCGAAGTCTCTTC  
TTCCGATCATACTCGGATCAAGAGAAGAAGGTTGGATTGAACTACACCGAAGTGTGTTGAGAAGCCCT  
TCCACCAAACACTCTTCGCATGAAGCACGGTACATACGACAAGCTGGATGAAGACGGTATCGTCGC  
TCCTGGTGTCCGAGTGTCTGGTGAAGACATCATTATTGGCAAGACGGCGCCGATTGACGCTGAGAC  
ACAAGATCTCGGTACCAGGACGACTATGCACCAGAGGCGAGATATCTCAACTCCTCTGCGTAGCACC  
GAGAACGGTATCGTTGACTCCGTCATTGTGACGGTGAACGCGACAATGTCAAGTATGTCAAGGTC  
CGTGTCCGAACGACCAAGATTCCCAGATTGGAGACAAGTTCGCCTCTCGTCACGGTCAAAGGGC  
ACTATTGGTGTACTTACCGACAAGAGGATATGCCCTTCACAAGAGAAGGTGTCACTCCAGACATCA  
TCATCAACCCTCACGCCATTCCATCCCGTATGACAATCGCTCACTTGATTGAGTGTCTCCTAAGTAAG  
GTCTCTACGCTGGAAGGTATGGAGGGTGTATGCCACCCCTTACGGACGTCACCGTCGACTCAGTCT  
CAGAGCTGTTGCGAAAGCACGGCTACCAGTCACGAGGCTTTGAGATTATGTACAATGGCCATACAG  
GCCGCAAGCTGAGAGCCCAGGTGTTCTTCGGACCGACATACTACCAGCGACTCCGTCACATGGTGG  
ATGATAAGATCCACGCTCGTGCCCGTGGTCCCCTACAGATTATGACTAGACAACCTGTGGAGGGTC  
GTGCGAGAGATGGTGGTCTCCGATTCCGAGAAATGGAACGTGATTGCATGATTGCTCACGGTGTCTG  
CCTCCTCCTCAAGGAGCGATTGTTGAGGTGTGACGACGCTTCCGAGTTCACATTTGCGAGATTTGT  
GGACTCATGACGCCTATTGCCAACCTCTCTAAGCAATCGTTTGTGAGTGTGACCTTGTAAAGAACAAGA  
CCAAGATTGCGCAGATTCACATCCCTTATGCTGCCAAGCTCCTGTTCCAGGAACCTCAGTTCGATGAAC  
ATTGCGGCTCGCATGTTCAAATCGGTCTGGCGGTCCGTCAGGTAA

>Trichoderma atroviride

ATGGCTGATTACGAAGACGATTACGACTATGAGAAGTATGGGGATGAGGATGAGGGCATCACGCC  
GAGGATTGCTGGACTGTGATTTCTCCTTCTTCGAGACCAAGGGCCTCGTATCACAGCAGACCGACT  
CCTTTGACGAGTTCACCCAGACGACAATCCAGGATCTCGTCAACGAATACTCCACCATCACACTCGAC  
CAGCCCAATCCTCCTTCGCCACCTGGTCAACGATAGCCCTTCGCCGATATGAAATCAAATTTGGAA  
GCGTCATGGTATCACGTCCCCTATCAGTGAGACGGATGGAAGTGTGACGTCTTTGCTCCCTTACGA  
ATGTCGAGACCGCAACCTGACTTACGCCAGTCCGCTGTACATCAAGATCACCAAGAAAGTGTCTGCG  
GCCGTCGAGAGGGAGGTTCCGCTGCATGAGATGGATGATGCCAGCAGGAACAGTATGCAAGGAC  
CGGAGAAAACCCACAAAGCTGGAATGGGAAGAGGAAGAGAATGGCGAAGACGACAATCTCGGC  
AAGTCTGACGACTGGAAGGACATGGTTTTGTTGGCAAGCTGCCATCATGGTCAAGTCCAAGATTT  
GTCATCTGAGCCGTGAACAGGATGACAGCCTGTTCTCGTCAACGAGTGCCTTATGACCAAGGAG



GCTACTTCGTTATCAACGGTAGTGAAAAGGTCCTCATCGCCCAGGAGCGTTCCGCCGCAAACATCGT  
CCAGGTCTTCAAGAAGGCCAGCCCAGTGCCTATACCTACACGGCCGAAATCCGAAGTGCCTGGA  
AAAGGGATCTCGACTCATCTCCAGCATGATGCTCAAGTTGTACGGCAAAGGAGACTCTGCGCGAGG  
TGGTTTTGGGCAAACGATTACACTACCCTGCCTTTGTCAAGTCAGATCTTCCCGTTGCCATTGTTTT  
CCGTGCCTTGGGCGTCGTTTCTGATGAGGACATTCTGAACCACATCTGCTACGACCGAAACGACAGC  
CAAATGCTCGAAATGCTTCGGCCTTGCATTGAAGAAGCCTTTTGTGTTTCAGGATCGAGAAGTTGCC  
TTGATTTTCATCGGAAAGCGAGGCAACCGTGATCAAGCCGGCCTCGGTCTGAGAAGCGTGTTCTGTG  
TAGCAAAGGACATTCTCCAGAAGGAGACGTTCCCCACATTTCCAGACTGAAGGCAGTGAGACCA  
GAAAGGCATTCTTCCTTGGATACATGGTGCACAAGCTATTGCAATGCGCACTTGAAGACGAGAGC  
CCGACGACCGAGACCACTTTGGAAAGAAGCGTCTAGATCTGGCGGGTCCACTGCTGGCCAAGCTGT  
TCCGTGGTATCATGCGCAGAATGAATACAGAGCTGGCCAACTACCTCAGACGATGTGTTGAGGGTA  
ACCGCACTTCAACCTTGTGTTGGCATTAAAGCCCGCACACTTTCCAACGGACTAAAGTACTCGCTC  
GCCACTGGAAACTGGGGTGACCAGAAGAAGGCAATGAGCTCGACCGCAGGTGTCTCACAGGTGCTT  
AACCGTTACACTTTTGTCTTACACTTTCCATTTGCGTCGTACCAATACACCCATCGGAAGAGATGG  
TAAGCTGGCGAAGCCTCGACAGCTCCACAACACACTGGGGTTTGGTGTGCCCGGCTGAGACCCC  
TGAAGGTCAAGCTTGTGGTCTGGTCAAGAATTTGTCTCATGTGCTACGTCAGTGTGGATCTCCTT  
CTGAGCCTTTGATCGAGTTTATGATCAACAGAGGTATGGAAGTCGTTGAGGAGTATGAGCCACTGA  
GGTATCCCATGCTACAAAGATCTTTGTGAATGGTGTCTGGGTTGGAATCCACCAAGACCCCAAGCA  
TCTGGTAAACCAAGTTTTGGATACTCGTCGCAAATCCTATCTGCAGTACGAGGTCTCTCTGATCAGAG  
AAATTCGAGACCAAGAATTCAAATCTTCTCTGACGCCGGCCGTGTCATGCGTCCCGTCTTCACTGTA  
CAGCAGGAAGATGACCCGGAAACGGGTATCAACAAGGGCCACCTGGTTTTGACCAAGGACCTTGT  
AATAGACTGGCCAAAGAGCAGGCTGAGCCTCCAGAAGACCCAAGCATGAAGCTCGGATGGGAGGG  
GCTGATTAGGGCTGGTGCGGTGAATATCTCGACGCCGAGGAAGAAGAAACGTCCATGATTTGCAT  
GACACCGGAAGATCTTGAGCTCTATCGTCTTCAAAGGCCGGCATTGCCACAGATGAAGACATAGG  
AGATGACCCAAATAAGCGTCTCAAGACCAAGACAAATCCGACAACCTCACATGTATACACATTGCGAG  
ATTCACCCGAGTATGATCTTAGGTATCTGTGCTAGTATCATTCTTTCCCGATCACACCAGTCCCC  
CGTAACACCTACCAGTCTGCCATGGGTAAACAAGCCATGGGCTTCTTCTTCAACCAACTATTCTCGGC  
TATGGACACCATGGCCAATATCTTACTACCTCAGAAACCGCTGGGCACCACTCGTTCTATGGAGT  
TTTTGAAATTCCGTGAGCTGCCAGCCGGACAAAACGCCATTGTAGCAATTGCTTGTACTCTGGTTAT  
AACCAAGAAGATTCCGTCATTATGAACAGAGTAGTATTGACAGAGGTCTTCCGAAGTCTTTTCTT  
CCGATCATATTCAGATCAAGAGAAGAAGTTGGCTTGAACCTACACGGAAGTGTTTGAGAAGCCATT  
CCACCAAAACACTCTTCGCATGAAGCACGGCACATATGACAAGCTGGACGAAGATGGTATCGTTGCT  
CCTGGTGTTCGTGTGTCAGGTGAGGATATCATCATCGGTAAGACAGCACCAATCGACGCCGAGACA  
CAGGATCTTGAACCAAGGACGACCATGCACCAAGACGCGATATCTCGACGCCTTTGCGAAGTACC  
GAGAATGGTATCGTCGACCAGGTTATCGTGACGGTGAACGCGGATAATGTTAAATATGTCAAGGTC  
CGTGTTCGAACGACCAAGATTCCCAGATTGGAGACAAGTTTGCCTCTCGTCACGGTCAGAAGGGC  
ACTATTGGTGTACCTACCGACAGGAGGACATGCCATTACCCAGAGAAGGTCTCACTCCAGATATCA  
TTATCAACCCCCACGCCATTCCGTCTCGTATGACAATTGCTCACTTGATTGAGTGTCTCTGAGTAAG  
GTCTCTACGTTGGAAGGTATGGAGGGTGTGCTACTCCCTTTACGGATGTCACCGTCGATTCAGTCT  
CTGAGCTCTTGCGAAAGCACGGCTACCAGTCTCGAGGCTTCCGAAATCATGTACAACGGCCATACTGG  
ACGCAAGTTAAGAGCACAAAGTATTCTTTGGACCAACATACTACCAGCGACTCCGCCACATGGTGGAC  
GACAAGATCCATGCCAGAGCTCGTGGTCTGTGTCAGATCATGACACGGCAGCCAGTGGAGGGTCTGT  
GCTCGAGATGGTGGTCTCCGATTCGGAGAAATGGAACGTGATTGTATGATTGCACACGGTGCAGCG  
TCCTTCTCAAGGAGCGATTGTTTGGAGGTGTGCGACGCCTTCCGAGTTCACATTTGCGAGATTTGTG  
GACTCATGACACCCATTGCTAACTTATCCAAACAATCGTTTGTGAGTGTGCGGCCATGCAAGAACAAGAC  
AAAGATTGCACAGATTCACATTCCTTACGCTGCCAAGCTTATTCCAGGAGCTCCAGTCAATGAACA  
TTGCAGCTAGAATGTACACCAACCGGTCTGGTGCATCTGTTCCGGTAG

>Trichoderma sp. T154

ATGGCTGACTACGAGGACGAATACGACTACGAGA ACTATGGAGACGAGGATGAAGGCATCACGCC  
CGAGGATTGCTGGACCGTCATCTCCTCTTTCGAAACCAAGGGTCTTGTGTGCGCAGCAGACCGAC  
TCCTTTGACGAATTCACCCAGACGACGATCCAGGATCTCGTAAACGAATATTCACCATCACACTCGA  
CCAGCCAAACCCTCCTTCGCCACCCGGTTCGAACAATAGCCCTTCGTGATATGAGATCAAGTTTGA  
AGCGTCATGGTGTACGTCCCCTATCAGTGAAACGGACGGA ACTGTGACTTCTCTGCTCCCTTACG  
AGTGCCGAGACCGCAACTTGACCTACGCCAGTCCCCTCTACATCAAGATTACTAAAAAGGTGTCCGC  
TGCCGTGAGAGGGAGGTTCCCCTGCACGAAATGGACGATGCTCAGCAGGAGGAATACGCAAGAA  
CCGGCGAACACCCTACAAA ACTTGAGTGGGAGGAGGAGGAGAACGGCGAAGATGACAACATCGGC  
AAGTCTGATGACTGGAAAGACATGGTCTTCGTTGGCAAGCTGCCCATCATGGTCAAATCCAAGATTT  
GTCATCTGAGCCGTGAACAGGATGATAGCCTGTTCTTGTCAACGAATGTCCCTACGATCAGGGTGG  
CTACTTTGTTATCAACGGCAGTAAAAGGTTCTCATCGCCCAAGAGAGATCTGCCGCCAACATTGTA  
CAAGTCTTCAAAAAGGCCAGCCAGTGCCTACACCTATACGGCTGAAATCCGAAGTGC GTTGGAAA  
AGGGCTCACGGCTCATCTCCAGCATGATGCTCAAGCTGTATGGCAAGGGAGACTCTGCTCGTGGTG  
GCTTTGGCCAGACTATCCACACCACTCTGCCCTTTGTCAAGTCAGATCTTCCCGTCGCCATTGTCTCC  
GTGCCCTAGGTGTCGTTTCTGATGAAGATATCCTCAACCACATTTGCTACGACCGCAACGACAGCCA  
GATGCTGGAGATGCTTCGACCTTGATTGAGGAGGCCTTCTGTGTCCAGGATCGAGAAGTTGCTCTC  
GATTCATCGGAAAGCGAGGAAACCGAGACCAAGCTGGTCTCGGACGCGAGAAACGTGTCCGCGT  
GGCCAAGGATATCCTTCAGAAGGAGACTCTTCCCACATTTACAGACAGAGGGAAAGTAAAACAG  
AAAGGCGTTCTTCTGGGATACATGGTGCACAAGCTGTTGCAATGTGCGCTCGGAAGAAGAGAGCC  
GGACGATCGTGACCACTTTGAAAGAAGCGTCTGGATCTGGCGGGTCCCCTGCTGGCCAAGCTGTT  
CCGTGGTATCATGCGAAGGATGAACACTGAGTTGGCCA ACTACCTGAGACGATGCGTTGAGGGCAA  
CCGACACTTCAACCTGGCTGTTGGTATCAAGCCC GGCACGCTTTCAAACGGACTGAAGTATTCGCTT  
GCCACAGGAAACTGGGGTGATCAGAAGAAGGCCATGAGCTCAACTGCCGGTGTGTCCAGGTGCTT  
AACCGTTACACGTTTGCTTCGACCTTGTCACATTTGCGTCTACCAACACTCCTATCGGGAGAGATGG  
TAAGCTGGCGAAGCCTCGACAGCTTCACAACACGCATTGGGGCTTGGTCTGCCAGCCGAGACACC  
CGAAGGACAGGCCTGTGGTCTGGTCAAGAACTTGTCTTTGATGTGTTACGTAGTGTGCGTTCTCCC  
TCCGAGCCTCTGATTGAGTTCATGATCAACAGAGGTATGGAAGTCGTGCAAGAGTACGAGCCGCTG  
CGGTATCCTCATGCTACAAAGATTTTTGTGAACGGTGTCTGGGTTGGAGTTCACCAAGACCCTAAGC  
ACTTGGTGAACCAGGTTCTGGATACTCGTCGCAAGTCCTATCTGCAATACGAAGTCTCTCTCGTGAG  
AGAAATTCGAGACCAGGAATTCAAAATCTTTTCCGATGCAGGTCGTGTCATGCGACCAGTCTTTACC  
GTTCAGCAGGAAGATGATCCGAAACGGGCATCAACAAGGGCCACCTGGTATTGACCAAGGAGCTC  
GTCAATAGATTGGCCAAGGAGCAGGCTGAGCCTCCGGAAGACCCAGCATGAAGATTGGATGGGA  
GGGATTGATCAGGGCTGGTGC GGTTGAATATCTCGACGCCGAGGAAGAGGAGACGGCCATGATCT  
GCATGACACCAGAGGATCTCGAGCTGTATCGTCTT CAGAAGGCCGGTATCAACACTGAGGAAGACA  
TGGGAGATGATCCGAACAAGCGACTCAAGACCAAGACGAACCCGACA ACTCACATGTACACCCATT  
GCGAGATTCACCCAAGTATGATCTTAGGTATCTGTGCTAGTATCATTCTTTCCCGATCACAACCAG  
TCCCCCGTAACACTTACCAATCTGCCATGGGTAAGCAAGCTATGGGTTTCTTCTCCTCACGAATTATTC  
TCGGCGCATGGACACCATGGCCAATATCCTTTACTACCCCAAGCCGCTGGGTACCACTCGATCC  
ATGGAGTTTTTGA AATTCCGAGAGTTGCCTGCTGGT CAGAACGCCATTGTAGCCATTGCCTGTTACTC  
TGTTACAACCAGGAAGATTCCGTCATTATGAACCAGAGTAGTATTGATAGAGGTCTTTTCCGAAGT  
CTCTTCTCCGATCATACTCTGATCAGGAGAAGAAGGTTGGGTTGAACTATAACGAAGTGTGTTGAGA  
AGCCCTTCCACAAAACACTCTTCGCATGAAGCACGGCACATACGACAAGCTGGATGAAGACGGTAT  
CGTTGCTCCTGGTGTCCGAGTATCTGGTGAGGACATCATTATTGGCAAGACGGCGCCGATTGACGCT  
GAGACACAAGATCTCGGTACCAGGACA ACTATGCACCAGAGGGCAGATATCTCAACTCCCCTGCGT  
AGCACCGAGAACGGTATCGTTGACTCTGT CATTGTGACAGTGAACGCGGACAATGTCAAGTATGTC  
AAGGTCCGTGTCCGAACGACCAAGATTCCCAGATTGGAGACAAGTTCGCCTCTCGTCACGGTCAA

AGGGCACTATTGGTGTACTTACCGACAAGAGGACATGCCCTTCACAAGAGAAGGTGTCACCTCCGG  
ACATCATCATCAACCCTCACGCCATTCCGTCCCGTATGACAATCGCTCACTTGATTGAGTGTCTCCTAA  
GTAAGGTCTCTACGCTGGAAGGTATGGAGGGTATGCCACTCCCTTTACGGACGTCACGGTCGACT  
CGGTCTCAGAGCTGCTGCGAAAGCACGGCTACCAGTCACGAGGCTTTGAGATTATGTACAATGGCC  
ACACAGGCCGCAAGCTCAGAGCCCAGGTGTTCTTTGGACCTACATACTACCAACGACTCCGTACAT  
GGTGGACGACAAGATCCACGCTCGTGCCCGTGGTCCCGTGACATCATGACCAGACAACCTGTGGA  
GGTTCGTGCCAGAGATGGTGGTCTCCGATTCGGAGAGATGGAACGTGATTGTATGATTGCTCACGG  
TGCCGCGTCTTCTCAAGGAGCGATTGTTTGAGGTGTCTGACGCCTTCCGAGTTCACATTTGCGAG  
ATTTGTGGACTCATGACGCCTATTGCCAACCTCTAAGCAATCGTTCGAATGTCGACCTTGTAAAGAA  
CAAGACCAAGATTGCGCAGATTCACATCCCCTATGCTGCCAAGCTTCTGTTCCAGGAACTCCAGTCG  
ATGAACATTGCGGCTCGCATGTTCAAAACCGGTCTGGCGCGTCTATCAGGTAA

>Trichoderma citrinoviride

ATGGCTGACTACGAGGACGACTACGACTACGAAAATTACGGAGATGAGGATGAGGGCATCACCCCC  
GAGGACTGCTGGACCGTCATCTCCTCTTCTCGAAACCAAGGGCCTTGCTCTCGCAGCAGACAGACT  
CCTTTGACGAGTTCACGCAGACGACGATCCAGGATCTCGTAAACGAATACTCCACCATCACCTCGA  
CCAGCCCAACCCGCCTTCGCCGCCGGCCGACAATAGCCCTTCGTCGATATGAGATCAAGTTTGGA  
AGTGTATGGTGTACGTCGACTATCAGTGAGACTGACGGGACCGTGACCTCTCTGCTCCGTACG  
AATGCCGAGATCGCAACTTGACGTACGCCAGTCCGCTCTATATTAAGATTACCAAGAAGCTGTCCGC  
CGCCGTCGAGAGGGAGATTCCGCTGCACGAGATGGACGATGCCAGCAGGAGGAATACGCGAGGA  
CCGCGGAGGCCCTACAAAGCTCGAGTGGGAGGAGGAGGAGGCTGGCGATGACGACCACAATGTG  
GGCAAGTCCGATGACTGGAAGGATATGGTCTTTGTGGCAAGCTGCCATCATGGTCAAGTCCAAG  
ATCTGCCATTTGAGCCGCGAAACCGACGACAGCCTGTTCTCGTCAACGAGTGTCCCTACGATCAGG  
GCGGCTACTTTGTCATCAACGGCAGTGAAAAGGTCTCATCGCCAGGAGAGATCTGCCGCCAACAT  
TGCCAAGTTTTCAAAAAGGCCAGCCAGTGTTACACCTACACGGCCGAGATCCGAAGCGCCCTC  
GAGAAGGGCTCGCGACTCATCTTAGCATGATGCTAAAGCTGTACGGCAAGGGAGATTCTGCCCGC  
GGAGGCTTCGGTCGACTATTCACACGACCCTGCCCTTGTCAAGTCGGATCTTCCCGTCGCCATTGT  
CTTCCGCGCCCTGGGTGTCGTTTCCGATGAAGACATTCTGAACCACATTTGCTACGACCGAAACGAC  
AGTCAGATGCTGGAATGCTTCGGCCGTGATTGAGGAGGCGTTTTGTGTCCAGGACCGAGAGGTC  
GCCCTGGATTTTCATCGGAAAGCGTGTAACCGAGACCAAGCCGGCCTCGGCCGTGAGAAGCGTGTG  
CGTGTGCCAAGGACATCCTCCAAAAGGAGACTGCCTCACATCTCTCAGACGGAAGGTAGCGAG  
ACCAGAAAGGCCTTCTTCTGGGCTACATGGTACATAAGCTGCTGCAGTGCGCACTCGGAAGAAGA  
GAGCCCGACGATCGTGACCACTTTGAAAGAAGCGTCTGGATCTGGCGGGTCCCTTGTGTCGAAG  
CTGTTCCGTGGCATCATGCGAAGAATGAACACGGAGCTGGCCAACTATCTGAGACGGTGTGTGGAG  
GGCAACCGACACTTCAATCTCGCGGTTGGTATCAAGCCCGGCACGCTTTCCAACGGCTTGAAGTACT  
CGCTCGCCACTGGAACTGGGGTGATCAGAAGAAGGCCATGAGCTCGACGGCAGGTGTGTCTCAG  
GTGCTCAACCGCTACACGTTTGCCTCGACCCTCTCGATTTGCGCCGCACCAACACGCCCATCGGAA  
GAGACGGCAAGCTGGCGAAGCCTCGACAGCTTCAACACCCATTGGGGCCTGGTCTGCCCGGCCG  
AGACACCCGAAGGACAGGCTTGTGGTCTTGTCAAGAACCTGTCTCTGATGTGTTACGTCAGTGTCCG  
CTCTCCGTCGGAGCCGTTGATTGAGTTCATGATCAACAGAGGCATGGAAGTCGTCGAGGAATACGA  
GCCATTGCGTTATCCTCACGCTACCAAGATCTTCGTCAACGGTGTCTGGGTGGGCGTTACCAAGAC  
CCAAGCATCTGGTTCAACAGGTTTTGGACTCGTCGTAATCTTACCTGCAGTACGAGGTCTCTCT  
TGTCCGAGAAATTCGAGACCAGGAGTTCAAAATCTTCTCCGACGCCGGCCGCGTCATGCGACCCGTC  
TTCACCGTCCAGCAAGATGACGAATCCGACAATGGCATTCCAAGGGCCACTTGGTACTGACCAAG  
AACTGGTTAATAAGTTGGCTCAAGAGCAGGCCGAGCCTCCAGAAGACCAAGCATGAAGATTGGTT  
GGGAGGGGCTCATCAGGGCTGGTGCAGTCAATATCTCGACGCCGAGGAAGAGGAGACGGCCATG  
ATTTGCATGACGCCGAGGATCTCGAACTGTATCGTGCTCAGAAGGCGGGCGTCCAGATGGAAGAG  
GATGTTGGCGACGATCCTAACAAGAGACTCAAGACGAAGACGAACCAACAACGCACATGTACACG

CATTGTGAGATTCATCCAAGCATGATCTTGGGCATTTGTGCAAGCATCATTCTTTCCCGATCACAA  
CCAGTCCCCCGTAACACATAACAGTCTGCCATGGGTAAACAAGCCATGGGTTTCTTCTCACCAACT  
ATTCCCGGCATGGATACCATGGCCAACATTCTCTACTACCCCAAGAGCCGCTGGGCACGACCCG  
CTCTATGGAGTTTTTTGAAATTCCGTGAGCTGCCGGCCGGACAAAACGCCATTGTAGCCATTGCTTGC  
TACTCTGGCTACAACCAGGAAGATTCGGTCATCATGAATCAGAGTAGTATCGACAGAGGCCTCTTCC  
GAAGTCTCTTCTTCCGATCCTACTCGGATCAGGAGAAGAAGGTGGGCTTGAACACACCGAAGTGTT  
TGAGAAGCCCTTCCACAAAACACCCTCCGCATGAAGCACGGCACATACGACAAGCTGGACGAGGA  
TGGCATCGTCGCTCCTGGTGTCCGAGTGTCCGGCGAGGACATCATCATCGGCAAGACAGCGCCGAT  
TGACGCCGACACACAAGATCTCGGCACCAGAACCACCATGCACCAGAGGCGTGATATCTCCACGCC  
CTGCGCAGCACCGAGAACGGCATCGTGGACTCTGTATCGTGACGGTCAACGCGGACAATGTCAAG  
TATGTCAAGGTCCGCGTCCGCACGACCAAGATTCCGCAGATTGGTGACAAGTTTGCCTCTCGTCACG  
GACAGAAGGGCACTATTGGTGTACTTACCGACAAGAGGACATGCCGTTACCAGAGAGGGAATCA  
CGCCAGACATCATCATCAACCCCCACGCCATTCCATCTCGTATGACAATCGCTCACTTGATTGAGTGT  
CTCCTAAGCAAGGTCTCAACGCTGGAAGGCATGGAGGGTGATGCCACCCCTTTACTGATGTCACG  
GTCGACTCGGTCTCGGAGCTGCTGCGAAAGCACGGCTACCAGTCCCGAGGCTTCGAGATCATGTAC  
AATGGTCACACAGGGCGCAAGCTGAGGGCCAGGTCTTCTTTGGACCGACATACTACCAGCGACTC  
CGCCACATGGTGGACGACAAGATCCACGCCCGTGCCCGTGGTCCGGTGCAGATCATGACACGACAG  
CCGGTGGAGGGTCTGCCCCGAGACGGTGGTCTCCGATTCGGAGAAATGGAGCGTGATTGCATGATT  
GCACACGGTGGCGCTTTTCTCAAGGAGCGATTGTTTGAGGTGTCTGACGCCTTCGAGTCCATA  
TTTGCAGATTTGTGGACTCATGACGCCATTGCCAACCTTTCTAAACAATCGTTTCGAGTGCCGGCCG  
TGCAAGAACAAAGACCAAGATTGCGCAGATTCACATACCTTACGCTGCCAAGCTGTTGTTCCAGGAGC  
TCCAGTGCATGAACATTGCAGCTCGAATGTTACCGACCGGTCCGGCGCGTCTGTCAAGTAA

>Trichoderma gamsii

ATGGCTGATTACGAAGACGATTACGACTATGAGAACTATGGGGATGAAGATGAGGGCATCACGCC  
GAGGATTGCTGGACTGTGATTTCTCCTTCTTCGAAACCAAGGGTCTTGTATCGCAGCAGACCGACT  
CCTTTGACGAGTTCACGCAGACGACAATCCAGGATCTCGTCAACGAATATTCCACCATCACACTCGAT  
CAGCCCAATCCTCCTTCGCCACCTGGTCTGAACGATAGCCCTTCGCCGATATGAAATCAAATTTGGAA  
GTGTATGGTATCACGTCCCACTATCAGTGAGACGGATGGAAGTGTGACATCTCTGCTCCCTTACGA  
ATGCCGAGACCGTAACTTGACTTACGCCAGTCCGCTTTACATCAAGATCACCAAGAAGGTGTCTGCG  
GCCGTCGAGAGGGAGGTTCCGTTGCACGAGATGGACGATGCCAGCAAGAACAGTATGCAAGGAC  
CGGAGAAAACCCACAAAGCTGGAATGGGAGGAGGAAGAAAATGGCGAAGACGACAATCTGGGC  
AAGTCTGATGACTGGAAGGACATGGTTTTCGTTGGCAAGCTGCCATCATGGTCAAATCCAAGATTT  
GTCATCTGAGCCGTGAACAGGATGACAGCCTGTTCTCGTCAACGAGTGCCCTTACGACCAAGGAG  
GCTACTTTGTTATCAACGGTAGTGAAAAGGTCCTCATCGCCAAGAGCGGTCCGCCGCAAACATTGT  
TCAGGTCTTCAAGAAGGCCAGCCCAGTGCCTATACCTACTGCTGAAATCCGAAGTGCAGTGGAA  
AAGGGATCTCGACTCATCTCCAGCATGATGCTCAAGTTGTATGGCAAAGGAGACTCTGCGCGAGGT  
GGTTTTGGACAAACTATTCACACAACCCTGCCTTTTGTCAAGTCAGATCTTCCCGTTGCCATTGTTTT  
CGTGCCTTGGGCGTCGTTTCTGATGAGGACATTCTGAATCACATCTGCTATGACCGAAACGACAGCC  
AAATGCTCGAAATGCTTCGGCCTTGCATTGAAGAAGCCTTTTGTGTTTCAGGATCGAGAAGTTGCTCT  
TGATTTTCATCGAAAGCGAGGCAATCGTGATCAGGCCGGCCTCGGTCTGAGAAGCGTGTTCTGTGT  
AGCAAAGGACATTCTTCAGAAGGAGACGCTTCCCACATTTCCAGACTGAAGGCAGTGAGACCAG  
AAAGGCATTCTTCTCGGATACATGGTGCACAAGCTGTTGCAATGCGCGCTCGGAAGACGAGAGCC  
CGACGACCGAGATCACTTTGGAAGAAGCGTCTGGATTTGGCGGGTCCACTGCTGGCCAAGCTGTT  
CCGTGGTATCATGCGCAGAAATGAATACTGAGCTGGCCAACCTGAGACGATGTGTTGAGGGTAA  
CCGCCACTTCAACCTTGCTGTTGGCATCAAGCCCGGTACACTTTCCAACGGACTCAAGTACTCACTCG  
CACTGGAAACTGGGGTGACCAGAAGAAGCAATGAGCTCGACTGCGGGTGTCTCACAGGTGCTTA  
ACCGTTACACTTTTCTTACTACTTTCCATTTGCGTCTACCAATACACCCATCGGAAGAGATGGT

AAGTTGGCGAAGCCTCGACAGCTCCACAACACACACTGGGGTTTGGTGTGCCCGGCCGAGACCCCT  
GAAGGACAGGCTTGTGGTCTGGTCAAGAATTTGTCTCTGATGTGTTACGTCAAGTGTGGATCTCCTT  
CTGAGCCTTTGATCGAGTTTATGATCAACAGAGGCATGGAAGTCGTTGAGGAGTATGAGCCACTGA  
GGTATCCCATGCCACAAAGATCTTTGTGAATGGTGTCTGGGTTGGAATTCATCAAGACCCAAAGCA  
TCTGGTAAACCAAGTCTTGGATACTCGTCGCAAGTCCTATCTGCAGTACGAGGTCTCTGATCAGA  
GAAATTCGAGACCAAGAATTCAAATCTTCTCTGATGCCGGTCTGTTATGCGACCCGTCTTCACTGT  
ACAGCAGGAAGATGACCCGAAACGGGTATCAACAAGGGCCACCTGGTTTTGACCAAGGACCTCGT  
CAATAGACTGGCCAAAGAGCAGGCTGAGCCTCCAGAAGACCCAAAGCATGAAGCTCGGATGGGAGG  
GGCTGATCAGGGCTGGTGGTGGTGAATATCTCGACGCCGAGGAGGAAGAAACGTCCATGATTTGC  
ATGACACCGGAAGATCTTGGCTTTATCGTCTTCAAAGGCCGGCATTGCCACGGATGAAGACATAG  
GAGATGACCCAAATAAGCGTCTCAAGACCAAGACAAATCCGACAACCTCACATGTATACGCATTGCGA  
GATTCACCCGAGTATGATTCTAGGTATCTGTGCTAGTATCATTCTTTCCCGATCACAACCAGTCCCC  
CCGTAACACCTATCAATCCGCCATGGGTAAACAAGCCATGGGCTTCTTAAACCAACTATTCTCGGC  
GTATGGACACCATGGCAAATATCCTTTACTACCCTCAGAAACCGCTTGGCACCCTCGCTCTATGGA  
GTTTTTGAATTCGTGAGCTGCCAGCCGGACAAAACGCCATTGTAGCGATTGCTTGTACTCTGGTT  
ATAACCAAGAAGATTCCGTCATTATGAACCAGAGTAGTATTGACAGAGGTCTCTCCGAAGTCTTTTC  
TTCCGATCATATTCAGATCAAGAGAAAAAGTTGGCTTGAATTACACGGAAGTGTGGAGAAGCCAT  
TCCACAAAACACTCTTCGTATGAAGCACGGCACATATGACAAACTGGATGAAGACGGTATTGTTGC  
TCCTGGTGTTCGTGTGTCAGGTGAGGATATCATCATCGGCAAGACGGCACCAATCGACGCCGAGAC  
ACAGGATCTTGAACACAGGACGACCATGCACCAAGACGCGATATCTCGACGCCTCTGCGAAGTAC  
CGAGAACGGCATTGTGACACAGGTTATCGTGACGGTGAACGCGGATAATGTCAAATATGTCAAGGT  
CCGTGTTCAACGACCAAGATTCCCCAGATTGGAGACAAGTTTGCTTCTCGTACGGTCAAAAGGGC  
ACTATTGGTGTACTTACCGACAGGAGGATATGCCTTTCTCAAGAGAAGGTCTCACACCAGATATCA  
TTATCAACCCCCACGCCATTCCGTCTCGTATGACAATTGCTCACTTGATCGAGTGTCTCCTAAGTAAG  
GTCTCTACGTTGGAAGGTATGGAGGGTGTGCTACTCCCTTTACGGATGTCACCGTCTGACTCCGTCT  
CAGAGCTCTTGCAAAGCACGGCTACCAGTCTCGAGGCTTCGAGATTATGTACAACGGCCATACTG  
GACGCAAGCTCAGGGCACAAGTATTCTTTGGACCAACATACTACCAGCGACTCCGCCACATGGTGG  
CGACAAGATCCATGCCAGAGCTCGTGGTCTGTGTCAGATCATGACTCGGCAGCCAGTGGAGGGTGC  
TGCTCGAGATGGTGGTCTCCGATTCCGAGAGATGGAACGTGATTGTATGATTGCACACGGTGCAGC  
GTCCTTCTCAAGGAGCGACTCTTTGAGGTATCGGACGCCTCCGAGTTCACATTTGCGAGATTTGTG  
GACTCATGACGCCATTGCTAACTTATCCAAACAATCATTGAGTGTGACCATGCAAGAACAAGAC  
CAAGATTGCACAGATTCACATTCCTTACGCTGCCAAGCTCTTGTCCAGGAGCTCCAGTCAATGAACA  
TTGCAGCTAGAATGTACACCAATCGGTCTGGTGCATCTGTCCGGTAG

>Trichoderma guizhouense

ATGGCTGACTACGAGGACGAATACGACTACGAGAACTACGGAGACGAGGATGAAGGCATCACTCC  
CGAGGATTGCTGGACTGTATCTCCTCCTTCTCGAAACCAAGGGTCTCGTATCGCAGCAGACCGAC  
TCCTTTGACGAATTTACCCAGACGACGATCCAGGACCTCGTAAACGAATACTCCACCATCACACTCGA  
CCAGCCAAACCCTCCTTCGCCACCCGGCCGAACAATAGCCCTTCGTCGATATGAGATCAAGTTTGA  
AGCGTCATGGTTTACGTCCCACTATCAGTGAGACGGACGGAAGTGTGACTTCTCTGCTCCCTTACG  
AGTGCCGAGACCGTAACTTGACCTACGCCAGTCCCCTTACATCAAGATTACTAAAAAGGTATCGGC  
TGCTGTTGAGAGGGGAGGTTCCCTGCACGAAATGGACGATGCCAGCAGGAAGAATACGCAAGAA  
CCGGCGAACACCCTACAAAGCTTGAGTGGGAAGAGGAGGAGAACGGCGAAGATGACAACATCGGC  
AAGTCTGATGACTGGAAGGACATGGTCTTCGTTGGCAAGCTGCCATCATGGTCAAATCCAAGATTT  
GTCATCTGAGCCGTGAACAGGATGATAGCCTGTTCTTGTCAACGAATGTCCCTACGATCAGGGTGG  
CTACTTTGTTATCAACGGCAGTGAAGAGTTCTCATCGCCAAAGAGAGATCTGCCGCCAACATTGTT  
CAAGTTTTCAAAGGCCAGCCAGTGCCTACACCTATACGGCTGAAATCCGAAGTGCCTGGGAA  
AGGGTTCACGGCTCATCTCCAGCATGATGCTCAAGCTGTATGGCAAGGGAGACTCTGCTCGTGGTG

GCTTTGGCCAAACTATCCACACCACCCTGCCCTTTGTCAAGTCAGATCTTCCCGTGGCCATTGTCTTCC  
GTGCCCTGGGTGTCGTTTCTGATGAAGATATCCTCAACCACATTTGCTACGACCGCAACGACAGCCA  
GATGCTGGAGATGCTTCGACCTTGTATTGAGGAGGCCTTCTGTGTCCAGGACCGAGAGGTTGCTCTC  
GATTCATCGGAAAGCGTGGAAACCGAGACCAAGCTGGTCTCGGACGCGAGAAGCGTGTCCGCGT  
GGCCAAGGATATCCTTCAGAAGGAGACTTTCCCCACATTTACAGACAGAGGGAAAGTGAACCAG  
AAAGGCATTCTTCCTGGGATACATGGTGCACAAGCTGTTGCAATGTGCGCTCGGAAGAAGAGAGCC  
CGATGATCGTGACCACTTTGAAAGAAGCGTCTGGATCTGGCGGGTCCCCTGCTAGCCAAGCTGTT  
CGTGGTATCATGCGAAGGATGAACACTGAATTGGCCAATTTGAGACGTTGCGTTGAGGGCAAC  
CGACACTTCAACCTTGCTGTGGGTATCAAGCCCGGCACGCTCTCAAACGGATTGAAGTATTCGCTTG  
CCACAGGAACTGGGGTATCAGAAGAAGGCCATGAGCTCAACTGCTGGTGTGTCCAGGTGCTTA  
ACCGATACACGTTTGCTTCGACTCTGTCACATTTGCGTCGTACCAACACTCCCATCGGAAGAGATGGT  
AAGCTGGCAAAGCCTCGACAGCTTCAACACGCATTGGGGTTTGGTCTGCCAGCCGAGACACCC  
GAAGGACAGGCCTGTGGTCTGGTCAAAAATTATCTTTGATGTGTTACGTCAGTGTGCGTTCTCCCTC  
TGAGCCTCTGATTGAGTTCATGATCAACAGAGGTATGGAAGTCGTGGAAGAGTACGAGCCGCTGCG  
GTATCCTCATGCTACAAAGATTTTTGTGAACGGTGTCTGGGTTGGAGTTCACCAAGACCCTAAGCAC  
TTGGTGAACCAGGTTCTGGATACTCGTCGCAAGTCCTATCTGCAGTACGAAGTTTCTCTGGTGAGAG  
AAATTCGAGACCAGGAATCAAATCTTTCCGACGCAGGTCGTGTCATGCGACCAGTCTTTACCGTT  
CAGCAGGAAGATGACCCGAAACGGGCATCAACAAGGGCCACCTGGTATTGACCAAGGAACTCGT  
CAATAGATTGGCCAAGGAGCAGGCTGAGCCTCCGGAAGACCCAGCATGAAGATTGGATGGGAGG  
GATTGATTCGGGCTGGTGCGGTTGAATACCTCGACGCCGAGGAAGAGGAGACGTCCATGATCTGCA  
TGACGCCAGAGGATCTCGAGCTGTATCGTCTTCAGAAGGCCGGTATTAATACCGAGGAAGACATGG  
GAGATGACCCGAACAAGCGACTAAAGACCAAGACGAACCCGACAACCTCACATGTACACCCATTGCG  
AGATTCACCCAAGTATGATCTTAGGTATCTGTGCTAGTATCATTCTTTCCCGATCACAACCAGTCCC  
CCCGTAACACTTACCAATCTGCCATGGGTAAGCAAGCTATGGGTTTCTTCCCTCACGAACTATCCCGG  
CGCATGGACACCATGGCCAACATTCTCTACTACCCCGAAGCCGCTGGGTACCACTCGATCCATGG  
AATTTTTGAAATTCGAGAGTTGCCTGCTGGTCAGAACGCCATTGTAGCCATTGCCTGTTACTCTGGT  
TACAACCAGGAAGATTCCGTCATTATGAACCAGAGTAGTATTGACAGAGGTCTTTCCGAAGTCTCT  
TCTTCCGATCATACTCGGATCAGGAGAAGAAGGTTGGATTGAACTACACCGAAGTGTGGAGAAGC  
CCTTCCACCAAATACTCTTCGCATGAAGCACGGTACATATGACAAGCTGGATGAAGACGGTATCGT  
TGCTCCTGGTGTCCGTGTATCTGGTGAAGATATCATTATTGGCAAGACGGCGCCGATTGACGCTGAG  
ACACAAGATCTTGGTACCAGGACAACCTATGCACCAGAGGCGAGATATCTCAACTCCTCTGCGTAGCA  
CTGAGAACGGTATCGTTGACTCTGTCATTGTGACAGTGAACGCGGACAATGTCAAGTATGTCAAAGT  
CCGTGTCCGAACGACCAAGATTCCCCAGATTGGAGACAAGTTCGCCTCTCGTCACGGTCAAAGGGC  
ACTATTGGTGTACTTACCGACAAGAGGACATGCCCTTACGAGAGAAGGTGTCACTCCAGACATCA  
TCATCAACCCTCACGCCATTCCATCCCGTATGACAATCGCTCACTTGATTGAGTGTCTCCTAAGTAAG  
GTCTCTACGCTGGAAGGTATGGAGGGTGACGCCACCCCTTACGGACGTACGGTCTGACTCGGTCT  
CAGAGCTGTTGCGAAAGCACGGTACCAGTACGAGGCTTTGAGATTATGTACAATGGCCACACAG  
GTCGCAAGCTGAGAGCCAGGTGTTCTTCGGACCAACATACTACCAGCGACTCCGTCACATGGTGG  
ACGACAAGATCCACGCTCGTGCCCGTGGTCCCGTGCAGATCATGACTAGACAACCTGTGGAGGGTC  
GTGCCAGAGATGGTGGTCTCCGATTCGGAGAAATGGAACGTGATTGTATGATTGCTCACGGTGCCG  
CGTCTTCCCTCAAGGAGCGATTGTTTGGAGGTGTCAGACGCCTTCCGAGTTCACATTTGCGAGATTTGT  
GGACTCATGACGCCTATTGCCAACCTCTAAGCAATCGTTCGAGTGTGACCTTGTAAGAACAAGA  
CCAAGATTGCGCAGATTCACATCCCCTATGCTGCCAAGCTCCTGTTCCAGGAACTCCAGTCGATGAA  
CATTGCGGCTCGTATGTTCAAAACCGGTCTGGCGCGTCCATCAGGTAA

>Trichoderma hamatum

ATGGCTGATTACGAAGACGAGTACGATTATGAGAACTATGGGGATGAGGATGAGGGCATCACGCC  
CGAGGATTGCTGGACTGTGATTCCTCTTTCTTCGAGACAAAGGGTCTTGTATCGCAGCAGACCGAC

TCCTTTGACGAGTTCACTCAGACGACAATCCAGGATCTCGTTAACGAATACTCCACCATCACCCCTCGA  
TCAGCCCAATCCTCCTTCGCCACCTGGCCGAACGATAGCCCTTCGCCGATATGAAATCAAATTTGGAA  
GTGTCATGGTATCACGCCCCACTATCAGTGAGACGGATGGAACCGTGACATCTTTGCTGCCTTACGA  
ATGTCGAGACCGTAACCTGACCTACGCCAGTCCGCTTACATCAAGATCACCAAAAAGGTGTCTGCG  
GCTGTCGAGAGGGAGGTTCCGCTGCACGAGATGGACGATGCCAGCAAGAAGAGTATGCAAGGAC  
CGGAGAGCACCTACAAAGCTGGAATGGGAGGAGGAAGAGAATGGCGAAGACGACAATCTCGGC  
AAGTCTGACGACTGGAAGGACATGGTTTTCGTTGGCAAGCTGCCTATCATGGTCAAATCTAAGATTT  
GTCATCTGAGCCGTGAACAGGATGATAGCCTGTTCTTGTTAACGAGTGCCCTTACGACCAAGGTGG  
CTACTTTGTTATCAACGGTAGTGAAAAGTCCCTCATTGCCAAGAGCGCTCCGCCGCAAACATTGTTCC  
AGGTCTTCAAGAAGGCCCAACCCAGTGCCTATACCTACACAGCCGAAATCCGAAGTGCCTGGAAA  
AGGGATCTCGACTCATCTCTAGCATGATGCTCAAGTTGTATGGCAAAGGAGACTCTGCGCGAGGTG  
GCTTTGGCCAGACTATTCACACAACCCTGCCTTTTGTCAAATCAGATCTTCCCCTTGCCATTGTTTTCC  
GTGCCTTGGGTGTGCTTTCTGATGAGGACATTCTGAATCACATTTGCTACGACCCGAAACGATAGCCA  
AATGCTTGAAATGCTCCGACCATGTATTGAAGAAGCCTTTTGCCTCCAGGATCGAGAGGTTGCTCTC  
GATTCATCGGAAAGCGAGGCAATCGTGATCAAGCTGGTCTCGGTCGTGAGAAGCGTGTTCGTGTA  
GCAAAGGATATTCTCCAGAAGGAGACGCTTCCCCACATTTCCAGACTGAGGGCAGTGAGACCAGA  
AAGGCATTCTTCTCGGATACATGGTGCACAAGCTATTGCAGTGCGCACTCGGAAGACGAGAGCCC  
GATGACCGTGATCACTTTGAAAGAAGCGTCTGGATCTGGCTGGTCCACTGCTGGCTAAGCTGTTCC  
GTGGTATCATGCGCAGGATGAATACCGAGTTGGCCAACTACCTGAGACGATGTGTTGAGGGTAACC  
GCCACTTCAACCTTGCTGTTGGCATCAAGCCCGGCACACTCTCCAACGGATTGAAGTATTCACTTGCC  
ACCGGAAACTGGGGTGACCAGAAGAAGGCAATGAGCTCGACTGCAGGTGTATCACAGGTGCTTAA  
CCGTTACACTTTTGCCTCGACACTTTCTCATTTGCGTCTGACCAACACACCCATTGGAAGAGATGGTA  
AGCTGGCGAAGCCTCGACAGCTTCAACAACACATTGGGGTTTGGTGTGCCAGCCGAGACCCCCG  
AAGGACAAGCTTGTGGTCTGGTCAAAAACCTGTCTCTGATGTGCTACGTACGTGTCGGATCTCCTTCT  
GAGCCTTTGATCGAGTTTATGATCAATAGGGGTATGGAGGTTGTTGAGGAGTACGAACCACTGAGG  
TATCCCCATGCTACAAAGATCTTTGTGAATGGTGTCTGGGTTGGAATCCACCAAGACCCCAAGCATC  
TGGTAAACCAAGTTTTGGACACTCGTCTGTAATCCTATCTGCAGTACGAAGTCTCTCTGATCAGAGAT  
ATTCGTGACCAAGAATTCAAATCTTCTCTGACGCCGGTCTGTGTTATGCGTCTGTCTTTACTGTACA  
GCAAGAAGATGACCCGGAACGGGTATCAACAAGGGCCACTTGGTATTGACCAAGGACCTCGTCAA  
CAGACTTGCCAAAGAGCAGGCTGAGCCTCCAGAAGACCCAAGCATGAAGCTTGGATGGGAGGGGT  
TAATTAGGGCTGGTGCAGTGAATATCTCGACGCCGAGGAAGAAGAACGGCTATGATTTGCATGA  
CACCGGAGGATCTTGAACCTTATCGTCTTCAGAAGGCTGGTATTTCCACGGATGAAGACATGGGAG  
ACGATCCAAACAAGCGTCTTAAGACCAAGACAAATCCGACAACCTCACATGTACACGCATTGCGAGAT  
TCACCCAAGTATGATCTTAGGTATCTGTGCTAGTATCATTCTTTCCCGATCACAACCAGTCCCCCG  
TAACACCTACCAATCTGCCATGGGTAACAAGCCATGGGCTTCTTCTTAACCAACTATTCTCGGCGTA  
TGGATACCATGGCCAATATCCTCTACTACCCTCAGAAGCCGCTGGGCACCACTCGGTCTATGGAGTT  
CTTGAAATCCGTGAACTGCCAGCCGGACAAAACGCCATTGTAGCAATTGCTTGTACTCTGGTTATA  
ACCAAGAAGATTCCGTCAATTATGAACCAGAGTAGTATTGACAGAGGTCTCTTCCGAAGTCTCTTCTC  
CGATCATATTCAGACCAAGAGAAGAAGGTTGGCTTGAACCTACACGGAAGTGTGTTGAGAAGCCATTC  
CACCAAAACACCCTTCGTATGAAGCACGGCACATATGACAAGTTGGATGAAGATGGTATCGTTGCTC  
CTGGTGTCCGTGTGTCTGGTGAAGGATATCATTATCGGCAAGACAGCGCCAATCGACGCCGAGACAC  
AGGATCTTGAACCAAGGACGACCATGCACCAGAGACGCGATATCTCAACGCCTCTGCGAAGCACTG  
AGAACGGTATCGTTGACCAGGTCATCGTAACGGTGAACGCGGACAATGTCAAATATGTCAAGGTCC  
GTGTTGAAACGACCAAGATTCCCCAGATTGGAGACAAGTTTGCCTCTCGTACGGTCAAAGGGCAC  
TATTGGTGTACTTACCGACAGGAGGATATGCCTTTACAAGAGAAGGTCTCACTCCAGATATCATT  
ATCAACCCCCACGCCATTCCGTCTCGTATGACAATTGCTCACTTGATTGAGTGTCTCTGAGTAAGGT  
CTCTACGTTGGAAGGTATGGAGGGTGATGCCACTCCCTTCACGGATGTCACGGTCTGACTCAGTCTCG

GAGCTCTTGCGGAAGCACGGCTACCAGTCTCGAGGCTTCGAGATTATGTACAATGGCCATACAGGT  
CGCAAGCTAAGAGCACAAGTGTCTTTGGACCAACATACTACCAGCGACTCCGTACATGGTGGATG  
ACAAGATCCATGCCAGAGCTCGTGGTCTGTGCAGATCATGACAAGACAGCCGGTGGAGGGTCTGTG  
CTCGAGATGGTGGTCTCCGATTCCGAGAAATGGAACGTGATTGTATGATTGCTCACGGTGCAGCGT  
CCTTCCTCAAGGAGCGACTATTTGAGGTGTCAGATGCTTTCCGAGTTCACATTTGCGAGATTTGTGG  
ACTCATGACACCCATTGCTAACTTGTCCAACAATCATTTGAGTGCCGACCATGCAAGAACAAGACC  
AAGATTGCACAGATTCACATTCCTTATGCTGCCAAGCTCTTGTTCGAAGAGCTCCAGTCAATGAACAT  
TGCAGCTAGAATGTACACAAACCGATCTGGTGCATCTGTTCCGGTAA

>Trichoderma harzianum

ATGGCTGACTACGAGGACGAATACGACTACGAGAACTACGGAGACGAGGATGAAGGCATCACTCC  
CGAGGATTGCTGGACTGTCATCTCCTCCTTCTTCGAAACCAAGGGTCTCGTATCGCAGCAGACCGAC  
TCTTTTGACGAATTCACCCAGACGACGATCCAGGACCTCGTAAACGAATACTCCACCATCACACTCGA  
CCAGCCAAACCCTCCTTCGCCACCCGGCCGAACAATAGCCCTTCGTGCATATGAGATCAAGTTTGGGA  
AGCGTCATGGTGTACGTCCACTATCAGTGAGACGGACGGCACTGTGACTTCTCTGCTCCCTTACG  
AGTGCCGAGACCGTAACTTGACCTACGCCAGTCCCCTCTATATCAAGATCACTAAAAAGGTGTCCGC  
TGCTGTTGAGAGGGAGGTTCCCTGCACGAAATGGACGATGCTCAGCAGGAGGAATACGCAAGAA  
CCGGCGAACACCCTACAAAGCTCGAGTGGGAAGAGGAGGAGAACGGCGAAGATGACAACATCGGC  
AAGTCTGATGACTGGAAGGACATGGTCTTCGTTGGCAAGCTGCCCATCATGGTCAAATCCAAGATTT  
GTCATCTGAGCCGTGAACAGGATGATAGCCTGTTCTTGTCAACGAATGTCCCTACGATCAGGGTGG  
CTACTTTGTTATCAACGGCAGTGAAAAGTCTCATCGCCCAAGAGAGATCCGCCGCCAACATTGTC  
CAAGTCTTCAAGAAGGCCAGCCAGTGCCTATACCTATACGGCTGAAATCCGAAGTGCCTGGAA  
AAGGGCTCACGGCTCATCTCTAGCATGATGCTCAAGCTGTATGGCAAGGGAGACTCTGCTCGTGGT  
GGCTTTGGCCAGACTATCCACACCACCCTGCCCTTGTCAAGTCAGATCTTCCCGTCGCCATTGTCTTC  
CGTGCCCTGGGTGTCTGTTCTGATGAAGATATCCTCAACCACATTTGCTACGACCGCAACGACAGCC  
AGATGCTGGAGATGCTTCGACCTTGTATTGAGGAGGCCTTCTGTGTCCAGGACCGAGAGGTTGCTCT  
GGATTTATCGGAAAGCGTGGAAACCGAGACCAAGCTGGTCTCGGACGCGAGAAGCGTGTCCGCG  
TGGCCAAGGATATCCTTCAGAAGGAGACTCTTCCCACATTTACAGACAGAGGGGAAGTGAACCA  
GAAAGGCATTTTTCTTGGGATACATGGTGCACAAGCTGTTGCAATGTGCGCTCGGAAGAAGAGAGC  
CCGACGATCGTGACCACTTTGAAAGAAGCGTCTGGATCTGGCGGGTCCCCTGCTGGCAAAGCTGT  
TCCGTGGTATCATGCGAAGGATGAACACTGAGTTGGCCAATCTGAGACGATGCGTCGAGGGCA  
ACCGACACTTCAACCTTGCTGTGGGTATCAAGCCCGGCACGCTTTCAAACGGATTGAAGTATTCGCT  
TGCCACAGGAAACTGGGGTGTATCAGAAGAAGGCCATGAGTCAACTGCAGGTGTGTCCCAGGTGCT  
TAACGTTACACGTTTGCTTCGACCCTATCACATTTGCGTCGTACCAATACTCCTATCGGAAGAGATG  
GTAAGCTCGCAAAGCCTCGACAGCTTCAACAACGCACTGGGGTTTGGTCTGCCCGGCCGAGACAC  
CCGAGGGACAGGCTTGTGGTCTGGTCAAGAATTGTCTTTGATGTGTTACGTACGTGTCGTTCTCC  
CTCCGAACCTCTGATTGAGTTCATGATCAACAGAGGTATGGAAGTCTGGAAGAGTACGAGCCGCT  
GCGGTATCCTCATGCTACAAAGATTTTTGTGAACGGTGTCTGGGTGGAGTCCACCAAGACCCTAAG  
CACTTGGTGAACCAGGTCCTGGACACTCGTCGCAAGTCTATCTGCAATACGAAGTCTCTCTCGTGA  
GAGAAATTCGAGACCAGGAATTCAAAATCTTTCCGACGCAGGCCGTGTAATGCGGCCAGTCTTTAC  
CGTTCAGCAGGAAGATGACCCGAAACGGGCATCAACAAGGGCCACCTGGTATTGACCAAGGAGC  
TCGTCAATAGATTGGCCAAGGAGCAGGCTGAACCTCCGGAAGACCCAGCATGAAGATTGGATGGG  
AGGGATTGATTAGGGCTGGTGCAGTTGAATATCTCGACGCCGAGGAAGAGGAGACGTCCATGATCT  
GCATGACGCCAGAGGATCTCGAGCTGTATCGTCTTCAGAAGGCTGGTATTAACACTGAGGAAGACA  
TGGGAGATGACCCGAACAAGCGACTAAAGACCAAGACAAACCCGACTACTCACATGTACACCCATT  
GCGAGATTCACCCAAGTATGATCTTAGGCATCTGTGCTAGTATCATTCTTTCCCGATCACAACCAG  
TCCCCCGTAACACTTACCAATCTGCCATGGGTAAGCAAGCTATGGGTTTCTTCTCACAACTATTC  
CCGGCGCATGGACACCATGGCCAACATTCTCTACTACCCCAAGAGCCGCTGGGTACCACTCGATCC



ATGGAGTTTTTGAAGTTCCGAGAGTTGCCTGCTGGTCAGAACGCCATTGTAGCCATTGCCTGTTACTC  
TGGTTACAACCAGGAAGATTCCGTCATTATGAACCAGAGTAGTATTGACAGAGGTCTTTCCGAAGT  
CTCTTCTCCGATCATACTCGGATCAGGAGAAGAAGTTGGATTGAACTACACCGAAGTGTGGAGA  
AGCCATTCCACAAAACACTCTTCGCATGAAGCACGGCACATACGACAAGCTGGATGAAGACGGTA  
TCGTTGCTCCTGGTGTCCGAGTATCTGGTGAAGATATCATTATTGGCAAGACGGCGCCGATTGACGC  
TGAGACACAAGATCTCGGTACCAGGACGACTATGCACCAGAGGCGAGATATCTCAACTCCTCTGCGT  
AGCACTGAGAACGGTATCGTTGACTCTGTCATTGTGACAGTGAACGCGGACAATGTCAAGTATGTCA  
AGGTCCGTGTCCGAACGACCAAGATTCCCTCAGATTGGAGACAAGTTCGCCTCTCGTCACGGTCAAAA  
GGGCACTATTGGTGTACTTACCGACAAGAGGACATGCCCTTACAAGAGAAGGTGTCACTCCAGAC  
ATCATCATCAACCCTCACGCCATTCCATCCCGTATGACAATCGCTCACTTGATTGAGTGTCTCCTAAGT  
AAGGTCTCTACGCTGGAAGGTATGGAGGGTGTATGCCACCCCTTCACGGATGTCACCGTCGACTCG  
GTCTCAGAGCTGTTGCGAAAGCACGGCTACCAGTACAGAGGCTTTGAGATTATGTACAATGGCCAC  
ACAGGCCGCAAGCTGAGAGCCCAGGTGTTCTTTGGACCAACATACTACCAGCGACTCCGTACATGG  
TGGACGACAAGATCCAGCTCGTGCCCGTGGTCCCGTGCAGATTATGACAAGACAACCCGTGGAGG  
GTCGTGCCAGAGATGGTGGTCTCCGATTCGGAGAAATGGAACGTGATTGTATGATTGCTCACGGTG  
CCGCGTCTTCTCAAGGAGCGATTGTTTGAGGTGTGACAGCCTTCCGAGTTCACATTTGCGAGAT  
TTGTGGACTCATGACGCTATTGCCAACCTCTTAAACAATCGTTCGAGTGTGACCTTGTAAAGAACA  
AGACCAAGATTGCACAGATTACATCCCTTATGCCGCAAGCTCCTGTTCCAGGAAGTCCAGTCGAT  
GAACATTGCGGCTCGCATGTTCAAAACCGGTCTGGCGCGTCCATCAGGTAA

>Trichoderma parareesei

ATGGCTGATTACGAGGACGACTACGACTACGAAAATATGGAGACGAGGACGAGGGCATCACTCCT  
GAGGACTGCTGGACCGTCATCTCCTCTTCTTCGAGACCAAGGGCCTTGTCTCGCAGCAGACAGACT  
CCTTTGACGAGTTCACGCAGACGACAATCCAGGACCTCGTAAACGAATACTCCACCATCACCTCGA  
CCAGCCCAACCCGCCTTCGCGGCCGCGGACAATAGCCCTTCGTGATATGAGATCAAGTTTGA  
AGCGTCATGGTGTACGCCCCACTATCAGTGAGACGGACGGAACCGTCACCTCCCTGCTTCCGTACG  
AGTGCCGAGATCGCAACTTGACATACGCCAGTCCGCTTACATTAAGATTACCAAGAAGCTGTGGC  
CGCCGTGAGAAGGAGATTCCGTTGCACGAGATGGACGACGCCAGCAGGAGGAGTACGCAAGGA  
CCGCGCAGGCCCCGACAAAATTTGAGTGGGAGGAGGAGGAGGCTGGCGAAGATGACCACAACATT  
GGCAAGTCTGAAGACTGGAAGGATATGTTTTCTGGGCAAGCTGCCCATCATGGTCAAGTCCAAG  
ATCTGTCAATTTGAGCCGCGAGACCGACGACAGCCTGTTTCTCGTCAACGAGTGTCCCTACGACCAGG  
GCGGCTACTTTGTCAATGGCAGTGAAAAGTTCTCATCGCCCAGGAGAGATCTGCCGCCAACAT  
CGTTCAAGTGTAAAAGGCCAGCCTAGTGCCTACACCTACACGGCGGAGATTGAAAGTGCCTC  
GAGAAGGGCTCGAGGCTCATCTTAGCATGATGCTCAAGCTCTACGGCAAGGGAGATTCTGCCCGC  
GGAGGCTTTGGTCAGACCATTACACGACCCTGCCCTTGTCAAGTCGGATCTTCCGGTAGCCATTGT  
CTTCCGCGCCTTGGGTGTCGTTTCTGATGAAGACATCCTGAACCATATTTGCTACGACCGAAACGAC  
AGTCAGATGCTGGAAATGCTTCGGCCATGCATTGAGGAGGCGTTCTGTGTCCAGGACCGAGAGGTC  
GCTCTGGACTTCATCGAAAGCGTGGTAACCGAGATCAAGCCGGTCTCGGCCGTGAGAAGCGTGTG  
CGTGTGGCCAAGGATATCCTCCAAAAGGAGACGCTGCCTCACATTTCCAGACAGAAGGTAGCGAG  
ACCAGAAAGGCCTTCTTCTTGGGCTACATGGTGCACAACTGCTGCAGTGCGCACTCGGCAGAAGA  
GAACCCGACGATCGTGACCACTTTGAAAGAAGCGGCTGGACCTGGCGGGTCTCTGCTGGCCAAG  
CTGTTCCGTGGCATCATGCGAAGAATGAACACCGAGCTGGCCAATATCTGAGACGGTGCCTGGAG  
GGCAACCGACACTTCAATCTCGCCGTGGCATCAAGCCCGGCACGCTTTCAAACGGCCTAAAGTACT  
CGCTCGCCACTGGAACTGGGGTGTATCAGAAGAAGGCCATGAGCTCGACCGCAGGTGTGTCTCAG  
GTGCTCAACCGCTACACGTTTGCCTCGACCTCTCGATTTGCGGCGTACCAACACGCCTATCGGAA  
GAGATGGCAAGCTGGCGAAGCCTCGACAGCTTACAACACCCACTGGGGTCTCGTCTGCCCGGCCG  
AGACACCCGAAGGACAGGCTGTGGTCTTGTCAAGAACCTGTCTCTGATGTGTTATGTCAGTGTGCG  
CTCTCCGTGAGAGCCGTTGATTGAGTTTATGATCAATAGGGGCATGGAAGTGGTTCGAGGAATACGA

GCCACTGCGTTATCCTCATGCTACCAAGATCTTCGTCAACGGTGTCTGGGTGGGCATTACCAGGAC  
CCCAAGCATCTCGTCCAGCAGGTCGTGGACTCGTCGTAATCCTACCTGCAGTACGAGGTCTCTC  
TCGTCAGAGAAATTCGAGACCAAGAGTTCAAGATCTTCTCGGATGCTGGCCGTGTCATGCGACCCGT  
TTTTACCGTCCAGCAAGATGAAGAGTCGGACACTGGCATTCCAAAGGGCCACTTGGTACTGACCAA  
GACCTCGTTAATAAGTTGGCCCAAGAGCAGGCCGAGCCGCCAGAAGACCCAAGCATGAAGATTGGA  
TGGGAGGGGCTCATCAGGGCTGGTGCAGTTGAGTATCTCGATGCCGAGGAAGAGGAGACGGCCAT  
GATTTGCATGACTCCCGAGGATCTCGAGCTGTATCGTGCCCAGAAGGCAGGCATTGCCACCGAAGA  
GGACGTGGGCGACGATCCGAACAAGCGACTCAAGACGAGGACAAACCAACAACGCACATGTACA  
CGCACTGCGAGATTCATCCAAGCATGATCTTGGGTATCTGCGCGAGCATCATTCTTTCCCGATCAC  
AACCAGTCCCCCGTAACACCTACCAATCTGCCATGGGTAAACAAGCCATGGGTTTCTTCTACCAA  
CTATTCCAGGCGCATGGATACCATGGCCAACATTCTCTACTACCCCAGAAGCCGCTGGGTACGACC  
CGCTCTATGGAGTTTTTTGAAGTTCGCGAGCTGCCGGCTGGACAAAACGCCATTGTAGCCATTGCTT  
GTTACTCTGGCTACAACCAGGAAGATTCGGTTCATCATGAATCAGAGTAGTATTGACAGAGGCCTCTT  
CCGAAGTCTCTTCTCCGATCTACTCGGATCAGGAGAAGAAGGTGGGCTTGAACACACCGAAGTG  
TTCGAGAAGCCGTTCCACCAAAACACCCTCCGTATGAAGCACGGCACATACGACAAGCTTGACGAG  
GACGGCATCGTCGCTCCTGGCGTCCGAGTTTCCGGGGAGGACATCATCATCGGCAAGACTGCGCCG  
ATTGACGCCGACACGCAAGATCTCGGCACCAGAACCACAATGCACCAGAGGCGTGATATCTCGACA  
CCCCTGCGCAGCACCGAGAACGGCATCGTGGACTCTGTCAATTGTGACGGTCAACGCGGACAATGTC  
AAGTATGTCAAGGTCCGCGTCCGACGACCAAGATTCCGCGAGATTGGTGACAAGTTTGCCTCTCGT  
ACGGACAAAAGGGCACTATTGGTGTCACTTACCGGCAGGAGGACATGCCGTTACCAGAGAGGGA  
ATTACGCCGACATCATCATCAACCCCCACGCCATTCCGTCTCGTATGACAATCGCTCACTTGATTGA  
GTGTCTCCTAAGCAAGGTCTCTACGTTGGAGGGTATGGAGGGTGATGCTACCCCTTTACCGATGTC  
ACGGTCGACTCGTTTTCGGAGCTGCTGCGAAAGCACGGCTACCAGTCTCGAGGCTTCGAGATCATG  
TACAATGGTACACGGGCCGCAAGCTGAGGGCCAGGTCTTCTTTGGACCAACATACTACCAGCGAC  
TCCGCCACATGGTGGACGACAAGATCCACGCCCGTGCCCGTGGTCCGGTGCAGATCATGACGCGAC  
AGCCGGTGGAGGGTTCGTGCCCAGACGGTGGTCTGCGATTCCGAGAAATGGAGCGTGATTGCATG  
ATTGCACACGGAGCCGCTCCTTCTCAAGGAGCGTTTGTGGAGGTGCTGACGCCTTCCGAGTTC  
ACATTTGCGAGATTTGTGGACTCATGACGCCATTGCCAACCTCTCCAAGCAATCGTTCGAGTGCCG  
GCCGTGCAAGAACAAGACCAAGATTGCGCAGATTCACATCCCTTATGCGGCCAAGCTCTTGTTCCAG  
GAGCTCCAGTCGATGAACATTGCCGCCGAATGTTACTGACCGGTCTGGCGCGTCTGTCAGGTAA

>Trichoderma reesei

ATGGCTGATTACGAGGACGACTACGACTACGAAAATATGGAGACGAGGACGAGGGCATCACCCCC  
GAGGACTGCTGGACCGTCATCTCCTCTTCTTCGAGACCAAGGGCCTCGTCTCGCAGCAGACAGACT  
CCTTTGACGAGTTCACGCAGACGACAATCCAGGACCTCGTAAACGAATACTCCACCATCACCCCTCGA  
CCAGCCCAACCCGCCTTCGCCGCCGGCCGACAATAGCCCTTCGTGATATGAGATCAAGTTTGGGA  
AGCGTCATGGTGTACGCCCCACTATCAGTGAGACGGACGGAACCGTCACCTCCCTGCTTCCGTACG  
AGTGCCGAGATCGCAACTTGACATACGCCAGTCCGCTGTACATTAAGATTACCAAGAACTGTCCGC  
CGCCGTGAGAAAGGAGATTCCGTTGCACGAGATGGACGACGCCAGCAGGAAGAGTACGCAAGGA  
CCGGCGAGGCCCTACAAAGCTCGAGTGGGAGGAGGAAGAGGCTGGCGAAGATGACCACAACATT  
GGCAAGTCCGAAGACTGGAAGGATATGGTCTTCGTGGGCAAGCTGCCCATCATGGTCAAGTCCAAG  
ATCTGTCAATTTGAGTCGCGAGACCGACGACAGCCTGTTTCTCGTCAACGAGTGTCCCTACGACCAGG  
GCGGCTACTTTGTTATCAATGGCAGTGAAAAGGTCCTCATCGCCAGGAGAGATCTGCTGCCAACAT  
CGTCCAAGTGTTCAAAAGGCCAGCCTAGTGCCTACACCTATACGGCGGAGATTGAAAGTGCCTC  
GAAAAGGGCTCGAGGCTCATCTCAAGCATGATGCTCAAGCTGTACGGCAAGGGAGATTCTGCCCGC  
GGAGGCTTTGGTCAGACCATTACACGACCCTGCCCTTGTCAAGTCGGATCTTCTGTGCGCCATTGT  
CTTCCGCGCCCTGGGTGTCGTTTCCGATGAGGACATCCTGAACCATATTTGCTACGACCGAAACGAC  
AGTCAGATGCTGGAAATGCTTCGGCCATGCATTGAGGAGGCGTTCTGTGTCCAGGACCGAGAGGTC

GCTCTGGACTTCATCGGAAAGCGTGGTAACCGAGACCAAGCGGGTCTCGGCCGTGAGAAGCGTGTG  
CGTGTGGCCAAGGATATCCTCCAAAAGGAGACGCTGCCTCACATTTCCAGACAGAAGGTAGCGAG  
ACCAGAAAGGCCTTCTTCTTGGGCTACATGGTGCACAACTGCTGCAGTGCGCACTCGGCAGAAGA  
GAACCCGACGATCGTGACCACTTTGAAAGAAGCGGCTGGACCTGGCGGGTCTCTGCTGGCCAAG  
CTGTTCCGTGGCATCATGCGAAGAATGAACACCGAGCTGGCCAATTATCTGAGACGGTGCCTGGAG  
GGCAACCGACACTTCAATCTCGCCGTCGGCATCAAGCCCCGGCACGCTTTCAAACGGCCTAAAGTACT  
CGCTCGCCACTGGAACTGGGGTGATCAGAAGAAGGCCATGAGCTCGACCGCAGGTGTGTCTCAG  
GTGCTCAACCGCTACACGTTTGCCTCGACCTCTCGCATTTGCGGCGTACCAACACGCCCATCGGAA  
GAGATGGCAAGCTGGCGAAGCCTCGACAGCTTACAACACCCATTGGGGTCTCGTCTGCCCGGCCG  
AGACACCCGAAGGACAGGCCTGTGGCCTTGTCAAGAACCTGTCTCTGATGTGTTATGTCAGTGTGCG  
CTCTCCGTCAGAGCCCTTGATTGAGTTTATGATCAATAGGGGCATGGAAGTGGTCGAGGAATACGA  
GCCACTGCGTTATCCTCACGCGACCAAGATCTTCTGCAACGGTGTCTGGGTGGGCATTACCAGGAC  
CCTAAGCATCTCGTCCAGCAGGTCGTGGACACTCGTCGTAATCCTACCTGCAGTACGAGGTCTCCC  
TCGTCAGAGAAATTCGAGACCAAGAGTTCAAGATCTTCTCGGATGCTGGCCGTGTCATGCGACCCGT  
TTTTACCGTCCAGCAAGATGAAGAGTCGGACACTGGCATTCCAAAGGGCCACTTGGTACTGACCAA  
GACCTCGTTAATAAGTTGGCCCAAGAGCAGGCCGAGCCGCCAGAAGACCCAAGCATGAAGATTGGA  
TGGGAGGGGCTCATCAGGGCTGGTGCAGTTGAGTATCTCGACGCCGAGGAAGAGGAGACGGCCAT  
GATTTGCATGACTCCCAGGATCTCGAGCTGTATCGTGCCAGAAGGCAGGCATTGCCACCGAAGA  
GGACGTGGGCGACGATCCGAACAAGCGACTCAAGACGAGGACAAACCAACAACGCACATGTACA  
CGCACTGCGAGATTATCCAAGCATGATCTTGGGTATCTGCGGAGCATCATTCCTTTCCCGATCAC  
AACCAGTCCCCCGTAACACCTACCAATCTGCCATGGGTAAACAAGCCATGGGTTTCTTCTCACCAA  
CTATTTCCCGGCGCATGGACACCATGGCCAACATTCTCTACTACCCCGAGAAGCCGCTGGGTACGACC  
CGCTCTATGGAGTTTTTAAAGTTCCGCGAGCTGCCGGCTGGACAAAACGCCATTGTAGCCATTGCTT  
GTTACTCTGGCTACAACCAGGAAGATTCGGTTCATCATGAATCAGAGTAGCATCGACAGAGGCCTCTT  
CCGAAGTCTCTTCTTCCGATCCTACTCGGATCAGGAGAAGAAGGTGGGCTTGAACACACCGAAGTG  
TTTGAGAAGCCGTTCCACCAGAACACCCTCCGCATGAAGCACGGCACATACGACAAGCTGGACGAG  
GACGGCATCGTTCGCTCCTGGCGTCCGTGTTTTCAGGAGAGGACATCATCATCGGCAAGACTGCGCCG  
ATTGACGCCGACACGCAAGATCTCGGCACCAGAACTACAATGCACCAGAGGCGTGATATCTCGACA  
CCCCGCGCAGCACCGAGAACGGCATCGTGGACTCTGTCATCGTGACGGTCAACGCGGACAATGTC  
AAGTATGTCAAGGTCCGGGTCCGCACGACCAAGATTCCGCAGATTGGTGACAAGTTTTCGCTCTGTC  
ACGGACAAAAGGGCACTATTGGTGTCACTTACCGGCAGGAGGACATGCCGTTACCAGAGAGGGA  
ATCACGCCCCGACATCATCAACCCCCACGCCATTCCGTCTCGTATGACAATCGCTCACTTGATTGA  
GTGTCTCCTAAGCAAGGTCTCTACGTTGGAGGGCATGGAGGGTGATGCGACACCCTTTACTGATGTT  
ACGGTCGACTCGGTCTCGGAGCTGCTGCGAAAGCACGGTACCAGTCCCGAGGCTTCGAGATCATG  
TACAATGGTACACGGGCCGCAAGCTGAGGGGCCAGGTCTTCTTTGGACCAACATACTACCAGCGAC  
TTCGCCACATGGTGGACGACAAGATCCACGCTCGTGCCCGAGGTCCGGTGCAGATCATGACGCGAC  
AGCCGGTGGAGGGTTCGTGCCCAGACGGTGGTCTCCGATTCGGAGAAATGGAGCGTGATTGCATG  
ATTGCACACGGAGCCGCGTCTTCTCAAGGAGCGATTGTTTGGAGGTGCTGACGCTTCCGAGTTC  
ACATTTGCGAGATTTGTGGACTCATGACGCCATTGCCAACCTCTCAAGCAATCGTTCGAGTCCG  
GCCGTGCAAGAACAAGACCAAGATTGCGCAGATTCACATCCCTTATGCGGCCAAGCTCTTGTTCAG  
GAGCTCCAGTCGATGAACATTGCCGCCGAATGTTTACTGACCGGTCCGGCGCGTCTGTCAAGGTAA  
>>Trichoderma virens

ATGGCCGACTACGAGGACGACTACGACTACGAGAACTACGGGGACGAGGATGAAGGAATCACGCC  
CGAGGATTGCTGGACCGTTCATCTCCTTCTTTCGAAACCAAGGGCCTTGTTCGCAGCAGACTGACT  
CCTTCGACGAGTTCACGCAGACGACGATCCAGGATCTGGTAAACGAATACTCCACCATCACACTCGA  
CCAGCCAAACCCTCCTTCCGACCCGCGCAACAATAGCCCTTCGTGATATGAGATCAAGTTTGA  
AGCGTCATGGTGTACGTCCCACTATCAGTGAAACGGACGGAAGTGTGACTTCTCTGCTCCCTTACG

AGTGCCGAGACCGCAACTTGACGTATGCCAGTCCGCTCTACATCAAGATCACCAAAAAAGTGTCGGC  
CGCCGTGAGAGGGAGGTTCCCCTCCATGAGATGGACGATGCTCAACAGGAGGAATATGCAAGGA  
CCGGCGAACACCCTACAAAGCTTGAGTGGGAAGAGGAGGAAAACGGCGAGGATGACAATGTTGGC  
AAGTCTGATGATTGGAAGGACATGGTCTTTGTTGGCAAGTTGCCATCATGGTCAAATCCAAGATTT  
GTCATCTGAGCCGTGAACAGGACGATAGCCTGTTCTTGTCAACGAATGTCCCTACGATCAGGGTGG  
CTACTTTGTTATCAACGGCAGTGAGAAGGTTCTCATCGCCCAAGAGAGATCCGCTGCCAATATCGTT  
CAAGTTTTCAAAAAGGCCAGCCCAGTGCCTATACGTACACGGCTGAAATCCGAAGTGCTTTGGAAA  
AGGGCTCACGGCTCATCTCCAGCATGATGCTCAAGCTGTACGGAAAGGGAGACTCTGCTCGTGGTG  
GCTTTGGCCAGACTATCCACACCACCCTCCCCTTTGTCAAGTCAGATCTCCCCGTCGCCATTGTCTTCC  
GTGCCCTGGGTGTCGTTTCTGATGAAGATATCCTGAACCACATTTGCTACGACCGCAACGACAGCCA  
GATGCTGGAGATGCTTCGACCTTGCATTGAGGAGGCTTTCTGTGTCCAGGACCGAGAGGTTGCTCTC  
GATTCATCGGAAAGCGAGGAAACCGAGACCAGGCTGGTCTCGGTCGTGAGAAGCGTGTTCCGCGT  
GGCCAAGGATATCCTTCAGAAGGAGACGCTTCCCTCACATTTCCCAGACGGAAGGCAGTGAAACCAG  
AAAGGCATTCTTCTGGGATACATGGTACACAAGCTGCTGCAATGCGCGCTCGGAAGAAGAGAGCC  
TGACGATCGTGACCACTTTGGAAGAAGCGTCTGGATCTGGCTGGTCCCCTGTTGGCTAAATTGTT  
CGTGGTATCATGCGAAGGATGAACACCGAATTGGCCAATCTGAGACGTTGCGTCGAGGGCAAC  
CGACACTTCAACCTTGCCGTTGGTATCAAGCCCGCACACTTCAAACGGATTGAAGTATTCGCTTGC  
CACTGGAAACTGGGGTGATCAGAAGAAGGCCATGAGCTCAACTGCCGGTGTGTCTCAGGTGCTTAA  
CCGTTACACGTTTGTTCGACCCTATCACATTTGCGTCGTACCAACACCCCCATTGGAAGAGATGGTA  
AGCTGGCGAAGCCTCGACAGCTTCACAACACGCATTGGGGTTTGGTGTGTCCAGCCGAGACACCCG  
AAGGACAGGCTTGTGGTCTGGTCAAAAATTGTCTCTGATGTGCTACGTCAGTGTGCGTTCTCCCTCC  
GAACCACTGATTGAGTTCATGATCAACAGAGGTATGGAAGTCGTCGAAGAGTACGAGCCGCTGCGA  
TATCCTCATGCTACCAAGATTTTCGTGAACGGTGTCTGGGTTGGAGTTCACCAAGACCCTAAGCATCT  
GGTGAACCAGTTCAGACACTCGTCGCAAATCCTATCTGCAGTATGAAGTCTCTCTCGTGAGAGAG  
ATTCGAGACCAGGAATTCAAAATCTTTTCCGATGCAGGCCGTGTCATGCGACCTGTATTTACCGTTCA  
GCAGGAGGATGACCCTGAAACAGGCATCAACAAGGGCCACCTGGTATTAACCTAAGGAGCTCGTCAA  
CAGATTGGCTAAGGAGCAAGCTGAACCTCCGGAAGACCCGAGCATGAAGATTGGATGGGAGGGAC  
TAATCAGGGCTGGTGCAGTTGAATATCTCGACGCCGAAGAAGAGGAGACGTGATGATTTGCATGA  
CACCAGAGGATCTCGAGCTGTATCGTCTTCAGAAAGCCGGTATCTCTACCGATGAAGACATGGGAG  
ATGATCCGAACAAGCGACTAAAGACGAAGACCAACCCAACAACCCACATGTACACACATTGCGAGA  
TTCACCCAAGCATGATCTTGGGCATCTGTGCTAGTATCATTCTTTCCCCGATCATAACCAGTCCCCC  
GTAACACTTACCAATCTGCCATGGGCAAGCAAGCTATGGGTTTCTTCTCACGAACTATTCCCGGCGC  
ATGGACACCATGGCCAATATCCTGTACTACCCCAAGCCGCTGGGTACCACTCGATCCATGGAGT  
TTTTGAAATTCCGCGAGTTGCCGCTGGACAAAACGCTATTGTAGCCATTGCCTGTTACTCTGGCTAC  
AACCAGGAAGATTCCGTCATTATGAACCAGAGCAGTATTGACAGAGGTCTCTTCCGAAGTCTCTTCT  
TCCGATCGTACTCGGACCAGGAGAAAAAGGTTGGCTTGAACACTACTGAAGTGTTGAGAAGCCGT  
TCCACCAAACACCCTCCGCATGAAGCACGGAACATATGACAAGCTGGATGAAGACGGTATCGTCG  
CCCCTGGTGTCCGAGTATCTGGTGAGGATATCATTATTGGCAAGACGGCGCCGATTGATGCCGAGA  
CACAAGATCTCGGTACCCGGACGACTATGCACCAGAGACGAGATATCTCAACCCCTCTGCGTAGTAC  
CGAGAACGGCATCGTCGACTCGGTCATTGTGACAGTGAACGCGGACAATGTCAAATACGTCAAGGT  
CCGTGTCCGAACGACCAAGATTCCCCAGATTGGAGACAAGTTCGCCTCTCGTCACGGTCAGAAGGG  
CACTATTGGTGTACTTACCGACAGGAGGACATGCCCTTACAAGAGAAGGTGTGACTCCAGATATT  
ATCATCAACCCTCACGCCATTCCATCCCGTATGACAATCGCTCACTTGATTGAGTGTCTCCTAAGTAA  
GGTCTCTACGCTGGAGGGTATGGAGGGTGTGCTACTCCCTTACGGATGTCACGGTCCGACTCGGT  
TCGGAAGTGTTCGAAAGCATGGCTACCAGTCACGAGGCTTTGAGATCATGTACAATGGCCATACG  
GGCCGCAAGCTGAGAGCCCAGGTGTTCTTCGGACCGACATACTACCAGCGACTCCGTACATGGTG  
GACGACAAGATTCACGCCCCTGCCGTTGGTCCCCTGCAGATCATGACCAGACAGCCCCTGGAGGGT

CGTGCTAGAGATGGTGGTCTTCGATTCGGAGAAATGGAGCGTGATTGTATGATTGCTCACGGTGCT  
GCATCCTTCCTCAAGGAGCGATTGTTTCGAGGTGTCTGACGCCTTCCGAGTTCACATTTGCGAGATTTG  
TGGACTCATGACGCCATTGCCAACCTATCTAAACAATCGTTCGAGTGTCGACCATGCAAGAACAAG  
ACCAAGATTGCGCAGATTCACATCCCTTATGCTGCTAAGCTCTTGTTCCAGGAGCTCCAATCCATGAA  
TATTGCAGCCCGCATGTTCAAAACCGGTCTGGCGCGTCTGTCAGGTAA

---

**Appendix S6.** *tef1* cds retrieved from the genomes of the 13 species analyzed in the present work

>Trichoderma arundinaceum

ATGGGTAAGGAGGACAAGACTCACATCAACGTGGTCGTTATCACTGGTCACTTGATCTACCAGTGCG  
GTGGTATCGACAAGCGTACCATCGAGAAGTTCGAGAAGGAAGCCGCCGAAGCTCGGCAAGGGTTCCCT  
TCAAGTATGCGTGGGTTCTTGACAAGCTCAAGGCCGAGCGTGAGCGTGGTATCACCATCGACATTG  
CCCTCTGGAAGTTCGAGACTCCCAAGTACTATGTCACCGTCATTGACGCTCCCGGCCACCGTGATTTCC  
ATCAAGAACATGATCACTGGTACTTCCCAGGCTGACTGCGCTATCCTCATTATCGCTGCCGGTACTGG  
TGAGTTCGAGGCTGGTATCTCCAAGGATGGCCAGACCCGTGAGCACGCTCTGCTCGCCTACACCCTG  
GGTGTCAAGCAGCTCATCGTCGCCATCAACAAGATGGACACTCCTTGAGGCTATCGACTCCATCGAG  
CCCCCAAGCGTCCCACGGACAAGCCCCTCCGTCTGCCCTCCAGGACGTGTACAAGATTGGTGGTA  
TCGGAACAGTCCCTGTGCGCCGTATCGAGACTGGTGTCTCAAGCCCGGTATGGTCGTTACCTTCGC  
TCCCTCCAACGTCAACTGAAGTCAAGTCCGTTGAGATGCACCACGAGCAGCTCAGCGAGGGCCA  
GCCCCGTGACAACGTTGGTTTCAACGTGAAGAACGTTCCGTC AAGGAAATCCGCCGTGGCAACGT  
TGCCGGTGACTCCAAGAACGACCCCCCATGGGCGCCGCTTCTTTCACCGCCCAGGTCATCGTCATG  
AACCACCCCGTCCAGGTTGGTGCCGGCTATGCCCCGTCTCGACTGCCACACTGCCACATTGCCT  
GCAAGTTCGCCGAGCTCCAGGAGAAGATCGACCGCCGTACCGGTAAGGCTACCGAGTCTGCCCCA  
AGTTCATCAAGTCCGGTGACTCTGCCATCGTCAAGATGGTTCCTCCAAGCCCATGTGCGTTGAGGC  
TTTACCGACTACCTCCCCTGGGTCGTTTCGCCGTCCGTGACATGCGTCAGACCGTCGCTGTGCGGTG  
TCATCAAGGCTGTGACAAGTCCGCTGCCACCAGTGGCAAGGTCACCAAGTCCGCTGCCAAGGCCA  
CCAAGAAATAA

>Trichoderma asperellum

ATGGGTAAGGAGGAGAAGACTCACATCAACGTGTCGTCATCACTGGTCACTTGATCTACCAGTGC  
GGTGGTATTGACAAGCGTACCATCGAGAAGTTCGAGAAGGAAGCCGCCGAAGCTCGGCAAGGGTTC  
CTTCAAGTATGCGTGGGTTCTTGACAAGCTCAAGGCCGAGCGTGAGCGTGGTATCACCATCGACATT  
GCCCTCTGGAAGTTCGAGACTCCCAAGTACTATGTCACCGTCATTGACGCTCCCGTCCACCGTGATTT  
CATCAAGAACATGATCACTGGTACCTCCCAGGCTGACTGCGCTATCCTGATTATCGCTGCCGGTACT  
GGTGAAGTTCGAGGCTGGTATCTCCAAGGATGGCCAGACCCGTGAGCACGCTCTGCTCGCCTACACC  
CTGGGTGTCAAGCAGCTCATCGTTGCCATCAACAAGATGGACACTCCTCGAGGCCATCGACGCCATT  
GAGCCCCCAAGCGTCCCACAGACAAGCCCCTCCGTCTGCCCTCCAGGACGTCTACAAGATCGGTG  
GTATCGGAACAGTCCCTGTGCGCCGTATCGAGACTGGTGTCTCAAGCCCGGTATGGTCGTCACCTT  
CGCTCCCTCCAACGTCAACTGAAGTCAAGTCCGTCGAGATGCACCACGAGCAGCTCGCTGAGGGT  
GTCCCCGGTGACAACGTTGGATTCAACGTCAAGAACGTCTCTGTCAAGGATATCCGCCGTGGTAACG  
TTGCCGGTGACTCCAAGAACGACCTCCCATGGGTGCCGCTTCTTTCACCGCCCAGGTCATTGTCATG  
AACCACCCTGGCCAGGTCGGTGCCGGTTACGCTCCCGTCTCGATTGCCACACTGCCACATTGCCT  
GCAAGTTCCTGAGCTCCTCGAGAAGATCGACCGCCGTACCGGTAAGGCTACTGAGGCCTCCCCAA  
GTTTCATCAAGTCTGGTGACTCCGCCATCGTCAAGATGGTTCCTCCAAGCCCATGTGCGTTGAGGCTT  
TCACCGACTACCTCCCCTGGGTCGTTTCGCCGTCCGTGACATGCGTCAGACCGTCGCCGTGCGGTGTC  
ATCAAGTCCGTCGAGAAGTCCACTGGTGCTGCCGGCAAGGTCACCAAGTCCGCCGCCAAGGCCGCC  
AAGAAATAA

>Trichoderma atrobrunneum

ATGGGTAAGGAGGACAAGACTCACATCAACGTGGTCGTTATCACCGTCACTTGATCTACCAGTGC  
GGTGGTATCGACCGTCGTACCATCGAGAAGTTCGAGAAGGAAGCCGCCGAAGCTCGGCAAGGGTTC  
TTCAAGTACGCTTGGGTTCTTGACAAGCTCAAGGCCGAGCGTGAGCGTGGTATCACCATCGACATTG  
CTCTGTGGAAGTTCGAGACTCCCAAGTACTATGTCACCGTCATTGACGCTCCCGGCCACCGTGATTTCC  
ATCAAGAACATGATCACTGGTACTTCCCAGGCCGATTGCGCTATCCTCATATTGCCGCCGGTACTG

GTGAGTTCGAGGCTGGTATCTCCAAGGATGGCCAGACCCGTGAGCACGCTCTGCTCGCCTACACCCT  
GGGTGTCAAGCAGCTCATCGTTGCCATCAACAAGATGGACTCCTTGAGGCTATCGACTCCATCGA  
GCCCCCAAGCGTCCCACGGACAAGCCCCTCCGTCTTCCCCTCCAGGATGTCTACAAGATCGGTGGT  
ATCGGAACAGTTCGCGTCCGCGTATCGAGACTGGTATCCTCAAGCCCAGTATGGTCGTACCTTCG  
CTCCCTCCAACGTCAACACTGAAGTCAAGTCCGTGAGATGCACCACGAGCAGCTCGTCGAGGGTGT  
TCCCGGTGACAACGTTGGTTTCAACGTCAAGAACGTTTCCGTTAAGGAAATTCGCCGTGGTAACGTT  
GCCGGTGACTCCAAGAACGACCCCCCATGGGTGCCGCTTCTTTCACCGCTCAGGTCATCGTCATGA  
ACCACCCTGGCCAGGTCGGTGCCGGTACGCCCCGTTCTTACTGCCACACTGCCACATTGCCTG  
CAAGTTCGCGAGCTCCAGGAGAAGATCGACCGCCGTACCGGTAAGGCTACCGAGACTGCCCCAA  
GTTTCATCAAGTCCGGTGACTCTGCCATCGTCAAGATGATTCCCTCCAAGCCCATGTGCGTTGAGGCTT  
TCACCGACTACCCTCCCCTGGGTGTTTTGCGCGTCCGTGACATGCGACAGACCGTCGCTGTGCGGTGT  
CATCAAGGCTGTGACAAGTCCGCTGCCACCGCTGGCAAGGTCACCAAGTCCGCTGCCAAGGCCAC  
CAAGAAATAA

>Trichoderma atroviride

ATGGGTAAGGAGGAGAAGACTCACATCAACGTGTCGTGTCATCACTGGTCACTTGATCTACCAGTGC  
GGTGGTATTGACAAGCGTACCATCGAGAAGTTCGAGAAGGAAGCCGCCGAGCTCGGCAAGGGTTC  
TTTCAAGTATGCGTGGGTTCTTGACAAGCTCAAGGCCGAGCGTGAGCGTGGTATCACCATCGACATT  
GCCCTCTGGAAGTTCGAGACTCCCAAGTACTATGTCACCGTCATTGACGCTCCCGTCCACCGTGATTT  
CATCAAGAACATGATCACTGGTACTTCCCAGGCTGACTGCGCTATCCTGATTATCGCTGCCGGTACTG  
GTGAGTTCGAGGCTGGTATCTCCAAGGATGGCCAGACCCGTGAGCACGCTCTGCTCGCCTACACCCT  
GGGTGTCAAGCAGCTCATCGTTGCCATCAACAAGATGGACTTCTCGAGGCCATTGACGCCATTGA  
GCCCCCAAGCGTCCCACAGACAAGCCCCTCCGTCTTCCCCTCAGGATGTTTACAAGATCGGTGGT  
ATTGGAACAGTCCCTGTGCGCCGTATCGAGACTGGTATCCTCAAGCCCAGTATGGTCGTTACCTTCG  
CTCCCTCCAACGTCAACACTGAAGTCAAGTCCGTTGAGATGCACCACGAGCAGCTCGTCGAGGGTGT  
CCCCGGTGACAACGTTGGATTCAACGTCAAGAACGTCTCCGTCAAGGATATCCGCCGTGGTAACGTT  
GCCGGTGACTCCAAGAACGACCCCCCATGGGTGCCGCTTCTTTCACCGCCAGGTCATCGTCATGA  
ACCACCCTGGCCAGGTCGGTGCCGGTACGCTCCCGTCTCGATTGCCACACTGCCACATTGCCTG  
CAAGTTCCTGAGCTCCTCGAGAAGATCGACCGCCGTACCGGTAAGGCTACTGAGGCCTCCCCAAG  
TTCATCAAGTCTGGTACTCCGCCATCGTCAAGATGGTTCCTCCAAGCCCATGTGCGTTGAGGCCTT  
CACCGACTACCCTCCCCTGGGTGTTTTGCGCGTCCGTGACATGCGCCAGACCGTCGCCGTGCGGTGTC  
ATCAAGTCCGTGAGAAGTCCACTGGTGCTACCGGCAAGGTCACCAAGTCCGCCGCAAGGCCGCC  
AAGAAATAA

>Trichoderma sp. T154

ATGGGTAAGGAGGAAAAGACTCACATCAACGTGGTCTTATCACCGGTCACTTGATCTACCAGTGC  
GGTGGTATCGACCGTCGTACCATCGAGAAGGAAGCCGCCAAGGTTCTTCAAGTAC  
GCTTGGGTTCTTGACAAGCTCAAGGCCGAGCGTGAGCGTGGTATCACCATTGACATTGCTCTGTGGA  
AGTTCGAGACTCCCAAGTACTATGTCACCGTCATTGACGCTCCCGGCCACCGTGATTTTCATCAAGAAC  
ATGATCACTGGTACTTCCCAGGCCGATTGCGCTATCCTCATCATTGCCGCCGGTACTGGTGAGTTCGA  
GGCTGGTATCTCCAAGGATGGCCAGACCCGTGAGCACGCTCTGCTCGCCTACACCCTGGGTGTTAAG  
CAGTTCATCGTTGCCATCAACAAGATGGACTCCTTGAGGCCATCGACTCCATCGAGCCCCCAAG  
CGTCCCACGGACAAGCCCCTCCGTCTTCCCCTCAGGATGTCTACAAGATCGGTGGTATTGGAACAG  
TTCCCGTCCGCGTATCGAGACTGGTGTCTCAAGCCCAGTATGGTTGTACTTTCGCTCCCTCCAAC  
GTCACCACTGAAGTCAAGTCCGTGAGATGCACCACGAGCAGCTCGTCGAGGGTGTTCGCCGTGAC  
AACGTTGGTTTCAACGTCAAGAACGTTTCCGTTAAGGAAATTCGCCGTGGTAACGTTGCCGGTGACT  
CCAAGAACGACCCCCCATGGGTGCCGCTTCTTTCACCGCTCAGGTCATCGTCATGAACCACCCTGG  
CCAGGTCGGTGCCGGTACGCCCCGTTCTTACTGCCACACTGCCACATTGCCTGCAAGTTCGCC  
GAGTCCAGGAGAAGATCGACCGCCGTACCGGTAAGGCTACCGAGACTGCCCCAAGTTCATCAAG

TCCGGTGA CTCTGCCATCGTCAAGATGATTCCCTCCAAGCCCATGTGCGTTGAGGCTTTCACCGACTA  
CCCTCCCCTGGGTGTTTTGCGCGTCCGTGACATGCGACAGACCGTCGCTGTGCGGTGTCATCAAGGCC  
GTCGACAAGTCCGCTGCCACCGCTGGCAAGGTCACCAAGTCCGCTGCCAAGGCCACCAAGAAATAA  
>Trichoderma citrinoviride

ATGGGTAAGGAGGACAAGACTCACATCAACGTGGTCGTTATCACTGGTCACTTGATCTACCAGTGCG  
GTGGTATCGACAAGCGTACCATTGAGAAGTTCGAGAAGGAAGCCGCCGA ACTCGGCAAGGGTTCT  
TCAAGTATGCGTGGGTTCTTGACAAGCTCAAGGCCGAGCGTGAGCGTGGCATCACCATCGACATTG  
CCCTCTGGAAGTTCGAGACTCCCAAGTACTATGTCACCGTCATTGACGCTCCCGGCCACCGTGACTTC  
ATCAAGAACATGATCACTGGTACTTCCCAGGCCGACTGCGCTATTCTCATCATTGCCGCCGGTACTG  
GTGAGTTCGAGGCTGGTATCTCCAAGGATGGCCAGACCCGTGAGCACGCTCTGCTCGCCTACACCCT  
GGGTGTCAAGCAGCTCATCGTCGCCATCAACAAGATGGACACTCCTTGAGGCCATCGACTCCATCGA  
GCCCCCAAGCGTCCCACGGACAAGCCCCTCCGTCTGCCCTTCAGGACGTCTACAAGATCGGTGGT  
ATCGGAACAGTTCGCGTCCGCGTATCGAGACTGGTGTCTCAAGCCC GGATGGTTCGTTACCTTCG  
CTCCCTCCAACGTCACTACTGAAGTCAAGTCCGTGAGATGCACCACGAGCAGCTCGCTGAGGGCCA  
GCCCCGGTGACAACGTTGGTTTTCAACGTGAAGAACGTTCCGTC AAGGAAATCCGCCGTGGCAACGT  
TGCCGGTGA CTCCAAGAACGACCCCCCATGGGCGCCGCTTCTTTCACCGCTCAGGTCATCGTCATG  
AACCACCCCGGCCAGGTCGGTCCGGGCTACGCCCCGTCCTCGACTGCCACACTGCCACATTGCCT  
GCAAGTTCGCCGAGCTCCTCGAGAAGATCGACCGCCGTACCGGTAAGGCCACCGAGACTGCCCCCA  
AGTTCATCAAGTCCGGTGACTCCGCCATCGTCAAGATGATTCCCTCCAAGCCCATGTGCGTTGAGGC  
TTTCACCGACTACCCTCCCCTGGGTGTTTTGCGCGTCCGTGACATGCGCCAGACCGTCGCTGTGCGGTG  
TCATCAAGGCCGTTGAGAAGTCCACCGCCGCGCCGGCAAGGTCACCAAGTCCGCTGCCAAGGCCG  
CCAAGAAATAA

>Trichoderma gamsii

ATGGGTAAGGAGGAGAAGACTCACATCAACGTGCTGTCATCACTGGTCACTTGATCTACCAGTGC  
GGTGGTATTGACAAGCGTACCATCGAGAAGTTCGAGAAGGAAGCCGCCGA ACTCGGCAAGGGTTCT  
TTCAAGTATGCGTGGGTTCTTGACAAGCTCAAGGCCGAGCGTGAGCGTGGTATCACCATCGACATTG  
CCCTCTGGAAGTTCGAGACTCCCAAGTACTATGTCACCGTCATTGACGCTCCCGGCCACCGTGATTT  
ATCAAGAACATGATCACTGGTACCTCCCAGGCTGACTGCGCTATCCTGATTATCGCTGCCGGTACTG  
GTGAGTTCGAGGCTGGTATCTCCAAGGATGGCCAGACCCGTGAGCACGCTCTTCTCGCCTACACCCT  
GGGTGTCAAGCAGCTCATCGTTGCCATCAACAAGATGGACACTTCTCGAGGCCATTGACGCCATTGA  
GCCCCCAAGCGTCCCACAGACAAGCCCCTTCGTCTGCCCTTCAGGATGTTTACAAGATCGGTGGT  
ATCGGAACAGTCCCTGTCGCGCGTATCGAGACTGGTATCCTCAAGCCC GGATGGTTCGTTACCTTCG  
CTCCCTCCAACGTCACTACTGAAGTCAAGTCCGTTGAGATGCACCACGAGCAGCTCGTTGAGGGTGT  
CCCCGGTGACAACGTTGGTTTTCAACGTCAAGAACGTCTCCGTC AAGGATATCCGCCGTGGTAACGTT  
GCCGGTGA CTCCAAGAACGACCCCCCATGGGTGCCGCTTCTTTCACGCCCAGGTCATCGTCATGA  
ACCACCCTGGCCAGGTCGGTGCCGATACGCTCCCGTCTCGATTGCCACACCGCCCACATTGCCTG  
CAAGTTCCTGAGCTCCTCGAGAAGATCGACCGCCGTACCGGTAAGGCTACTGAGGCCTCCCCAAG  
TTCATCAAGTCTGGTGA CTCCGCCATCGTCAAGATGGTTCCTCCAAGCCCATGTGCGTTGAGGCTTT  
CACCGACTACCCTCCCCTGGGTGTTTTGCGCGTCCGTGACATGCGCCAGACCGTCGCCGTCGGTGT  
ATCAAGTCCGTCGAGAAGTCCACTGGTGTACCGGCAAGGTCACCAAGTCCGCGCCAAGGCCGCC  
AAGAAATAA

>Trichoderma guizhouense

ATGGGTAAGGAGGACAAGACTCACATCAACGTGGTCGTTATCACCGGTC ACTTGATCTACCAGTGC  
GGTGGTATCGACCGTCGTACCATCGAGAAGTTCGAGAAGGAAGCCGCCGA ACTCGGCAAGGGTTCT  
TTCAAGTACGCTTGGGTTCTTGACAAGCTCAAGGCCGAGCGTGAGCGTGGTATCACCATCGACATTG  
CTCTGTGGAAGTTCGAGACTCCCAAGTACTATGTCACCGTCATTGACGCTCCCGGCCACCGTGATTT  
ATCAAGAACATGATCACTGGTACTTCCCAGGCCGATTGCGCTATCCTCATCATTGCCGCCGGTACTG



GTGAGTTCGAGGCTGGTATCTCCAAGGATGGCCAGACCCGTGAGCACGCTCTGCTCGCCTACACCCT  
GGGTGTCAAGCAGCTCATCGTTGCCATCAACAAGATGGACTCCTTGAGGCCATCGACTCCATCGA  
GCCCCCAAGCGTCCCACGGACAAGCCCCTCCGTCTTCCCCTCCAGGATGTCTACAAGATCGGTGGT  
ATTGGAACAGTTCCTGTGCGCCGTATCGAGACTGGTATCCTCAAGCCCAGTATGGTTCGTCACCTTCG  
CTCCCTCCAACGTCACCACTGAAGTCAAGTCCGTGAGATGCACCACGAGCAGCTCGTCGAGGGTGT  
TCCCGGTGACAACGTTGGTTTCAACGTCAAGAACGTTTCCGTTAAGGAAATTCGCCGTGGTAACGTT  
GCCGGTGACTCCAAGAACGACCCCCCATGGGTGCCGCTTCTTTCACCGCTCAGGTCATCGTCATGA  
ACCACCCTGGCCAGGTCGGTGCCGGTACGCCCCGTTCTTGACTGCCACACTGCCACATTGCCTG  
CAAGTTCGCGAGCTCCAGGAGAAGATCGACCGCCGTACCGGTAAGGCTACCGAGACTGCCCCAA  
GTTTCATCAAGTCCGGTGACTCTGCCATCGTCAAGATGATTCCCTCCAAGCCCATGTGCGTTGAGGCTT  
TCACCGACTACCCTCCCCTGGGTGTTTTGCGCGTCCGTGACATGCGACAGACCGTCGCTGTGCGGTGT  
CATCAAGGCTGTGACAAGTCCGCTGCCACCGCTGGCAAGGTCACCAAGTCCGCTGCCAAGGCCAC  
CAAGAAATAA

>Trichoderma hamatum

ATGGGTAAGGAGGAGAAGACTCACATCAACGTGTCGTTATCACTGGTCACTTGATCTACCAGTGCG  
GTGGTATTGACAAGCGTACCATCGAGAAGTTCGAGAAGGAAGCCGCCGAACCTCGGCAAGGGTTCCT  
TCAAGTATGCGTGGGTTCTTGACAAGCTCAAGGCCGAGCGTGAGCGTGGTATCACCATCGACATTG  
CCCTGTGGAAGTTCGAGACTCCCAAGTACTATGTCACCGTCATTGACGCTCCCGGTACCGTGATTC  
ATCAAGAACATGATCACTGGTACTCCAGGCCGATTGCGCTATCCTCATTATCGCTGCCGGTACTG  
GTGAGTTCGAGGCTGGTATCTCCAAGGATGGCCAGACCCGTGAGCACGCTCTGCTCGCCTACACCCT  
GGGTGTCAAGCAGCTCATTGTTGCCATCAACAAGATGGACTCCTCGAGGCCATTGACGCCATCGA  
GCCCCCAAGCGTCCCACAGACAAGCCCCTCCGTCTGCCCTTCAGGATGTCTACAAGATCGGTGGT  
ATCGGAACAGTCCCTGTGCGCCGTATCGAGACTGGTATCCTCAAGCCCAGTATGGTTCGTTACCTTCG  
CTCCTTCCAACGTCACCACTGAAGTCAAGTCCGTGAGATGCACCACGAGCAGCTCGTTGAGGGTGT  
CCCCGGTGACAACGTTGGATTCAACGTCAAGAACGTCTCCGTCAAGGATATCCGCCGTGGTAACGTT  
GCCGGTGACTCCAAGAACGACCCCCCATGGGTGCCGCTTCTTTCACGCCCAGGTCATCGTCATGA  
ACCACCCTGGCCAGGTCGGTGCCGGTACGCTCCCGTCTCGATTGCCACACTGCCACATTGCCTG  
CAAGTTCCTGAGCTCCTCGAGAAGATCGACCGCCGTACCGGTAAGGCTACTGAGGCCTCCCCAAG  
TTCATCAAGTCTGGTGACTCCGCCATCGTCAAGATGGTTCCTCCAAGCCCATGTGCGTTGAGGCTTT  
CACCGACTACCCTCCCCTGGGTGTTTTGCGCGTCCGTGACATGCGACAGACCGTCGCCGTGCGGTGTC  
ATCAAGTCCGTGAGAAGTCCACTGGTGCTGCCGGTAAGGTCACCAAGTCCGCCGCCAAGGCCGCC  
AAGAAATAA

>Trichoderma harzianum

ATGGGTAAGGAGGACAAGACTCACATCAACGTGGTTCGTTATCACCGTCACTTGATCTACCAGTGC  
GGTGGTATCGACCGTCGTACCATCGAGAAGTTCGAGAAGGAAGCCGCCGAACCTCGGCAAGGGTTCCT  
TTCAAGTACGCTTGGGTTCTTGACAAGCTCAAGGCCGAGCGTGAGCGTGGTATCACCATCGACATTG  
CTCTGTGGAAGTTCGAGACTCCCAAGTACTATGTCACCGTCATTGACGCTCCCGGCCACCGTGATTC  
ATCAAGAACATGATCACTGGTACTTCCAGGCCGATTGCGCTATCCTCATATTGCCGCCGGTACTG  
GTGAGTTCGAGGCTGGTATCTCCAAGGATGGCCAGACCCGTGAGCACGCTCTGCTCGCCTACACCCT  
GGGTGTCAAGCAGCTCATTGTTGCCATCAACAAGATGGACTCCTTGAGGCTATCGACTCCATCGA  
GCCCCCAAGCGTCCCACGGACAAGCCCCTCCGTCTTCCCCTCCAGGATGTCTACAAGATCGGTGGT  
ATTGGAACAGTTCCTGTCGCGCCGTATCGAGACTGGTATCCTCAAGCCCAGTATGGTTCGTCACCTTCG  
CTCCCTCCAACGTCACCACTGAAGTCAAGTCCGTGAGATGCACCACGAGCAGCTCGTCGAGGGTGT  
TCCCGGTGACAACGTTGGTTTCAACGTCAAGAACGTTTCCGTTAAGGAAATTCGCCGTGGTAACGTT  
GCCGGTGACTCCAAGAACGACCCCCCATGGGTGCCGCTTCTTTCACCGCTCAGGTCATCGTCATGA  
ACCACCCTGGCCAGGTCGGTGCCGGTACGCCCCGTTCTTGACTGCCACACTGCCACATTGCCTG  
CAAGTTCGCGAGCTCCAGGAGAAGATCGACCGCCGTACCGGTAAGGCTACCGAGACTGCCCCAA

GTTTCATCAAGTCCGGTACTCTGCCATCGTCAAGATGATTCCTCCAAGCCCATGTGCGTTGAGGCTT  
TCACCGACTACCTCCCCTGGGTCGTTTCGCCGTCCGTGACATGCGACAGACCGTCGCTGTGCGGTGT  
CATCAAGGCTGTGACAAGTCCGCCGCCACCGCTGGCAAGGTCACCAAGTCCGCTGCCAAGGCCAC  
CAAGAAATAA

>*Trichoderma parareesei*

ATGGGTAAGGAGGACAAGACTCACATCAACGTGGTTCGTTACTACTGGTCACTTGATCTACCAAGTGC  
GTGGTATCGACAAGCGTACCATTGAGAAGTTCGAGAAGGAAGCTGCCGAACCTCGGCAAGGGTTCCT  
TCAAGTACGCGTGGGTTCTTGACAAGCTCAAGGCCGAGCGTGAGCGTGGTATCACCATCGACATTG  
CCCTCTGGAAGTTCGAGACTCCCAAGTACTATGTCACCGTCATTGACGCTCCCGGCCACCGTGACTTC  
ATCAAGAACATGATCACTGGTACTTCCCAGGCCGACTGCGCTATCCTCATTATCGCTGCCGGTACTG  
GTGAGTTCGAGGCTGGTATCTCCAAGGATGGCCAGACCCGTGAGCACGCTCTGCTCGCCTACACCCT  
GGGTGTCAAGCAGCTCATCGTCGCCATCAACAAGATGGACACTCCTTGAGGCCATCGACTCCATCGA  
GCCCCCAAGCGTCCCACGGACAAGCCCCTGCGTCTGCCCTCCAGGACGTCTACAAGATCGGTGGT  
ATCGGAACAGTTCGCGTCCGCGTATCGAGACTGGTGTCTCAAGCCCAGGATGGTTCGTTACCTTCG  
CCCCCTCCAACGTCACCACTGAAGTCAAGTCCGTCGAGATGCACCACGAGCAGCTCGCTGAGGGTCA  
GCCCCGTGACAACGTTGGTTTCAACGTGAAGAAGTCTCCGTCAAGGAAATCCGCCGTGGTAACGT  
TGCCGGTACTCCAAGAACGACCCCCCATGGGCGCCGCTTCTTTCACCGCCCAGGTCATCGTCATG  
AACCACCCCGGCCAGGTCGGTGGCGGCTACGCCCCGTCTCGACTGCCACACTGCCACATTGCCT  
GCAAGTTCGCCGAGCTCCTCGAGAAGATCGACCGCCGTACCGGTAAGGCTACCGAGACTGCCCCCA  
AGTTCATCAAGTCCGGTACTCCGCCATCGTCAAGATGATCCCCTCCAAGCCCATGTGCGTTGAGGC  
TTTACCGACTACCTCCCCTGGGTCGTTTCGCCGTCCGTGACATGCGCCAGACCGTCGCTGTGCGGTG  
TCATCAAGGCCGTTGAGAAGTCTCTGCCGCCGCCGGAAGGTCACCAAGTCCGCTGCCAAGGCTG  
CCAAGAAATAA

>*Trichoderma reesei*

ATGGGTAAGGAGGACAAGACTCACATCAACGTGGTTCGTCATCACTGGTCACTTGATCTACCAAGTGC  
GGTGGTATCGACAAGCGTACCATTGAGAAGTTCGAGAAGGAAGCCGCCGAACCTCGGCAAGGGTTC  
CTTCAAGTACGCGTGGGTTCTTGACAAGCTCAAGGCCGAGCGTGAGCGTGGTATCACCATCGACATT  
GCCCTCTGGAAGTTCGAGACTCCCAAGTACTATGTCACCGTCATTGACGCTCCCGGCCACCGTGACTT  
CATCAAGAACATGATCACTGGTACTTCCCAGGCCGACTGCGCTATCCTCATCATCGCTGCCGGTACTG  
GTGAGTTCGAGGCTGGTATCTCCAAGGATGGCCAGACCCGTGAGCACGCTCTGCTCGCCTACACCCT  
GGGTGTCAAGCAGCTCATCGTCGCCATCAACAAGATGGACACTCCTTGAGGCCATCGACTCCATCGA  
GCCCCCAAGCGTCCCACGGACAAGCCCCTGCGTCTTCCCCTCCAGGACGTCTACAAGATCGGTGGT  
ATCGGAACAGTTCGCGTCCGCGTATCGAGACTGGTGTCTCAAGCCCAGGATGGTTCGTTACCTTCG  
CTCCCTCCAACGTCACCACTGAAGTCAAGTCCGTCGAGATGCACCACGAGCAGCTCGCTGAGGGCCA  
GCCTGGTGAACAACGTTGGTTTCAACGTGAAGAAGTTCGTCGTCGTCGTCGTCGTCGTCGTCGTCGTC  
GCCGGTACTCCAAGAACGACCCCCCATGGGCGCCGCTTCTTTCACCGCCCAGGTCATCGTCATGA  
ACCACCCCGGCCAGGTCGGTGGCGGCTACGCCCCGTCTCGACTGCCACACTGCCACATTGCCTG  
CAAGTTCGCCGAGCTCCTCGAGAAGATCGACCGCCGTACCGGTAAGGCTACCGAGTCTGCCCCAA  
GTTTCATCAAGTCTGGTACTCCGCCATCGTCAAGATGATCCCCTCCAAGCCCATGTGCGTTGAGGCTT  
TCACCGACTACCTCCCCTGGGTCGTTTCGCCGTCCGTGACATGCGCCAGACCGTCGCTGTGCGGTGT  
ATCAAGGCCGTCGAGAAGTCTCTGCCGCCGCCGGAAGGTCACCAAGTCCGCTGCCAAGGCCGCC  
AAGAAATAA

>*Trichoderma virens*

ATGGGTAAGGAGGAGAAGACTCACATCAACGTGGTTCGTCATCACTGGTCACTTGATCTACCAAGTGC  
GGTGGTATCGACAAGCGTACCATCGAGAAGTTCGAGAAGGAAGCCGCCGAACCTCGGCAAGGGTTC  
CTTCAAGTACGCTTGGGTTCTTGACAAGCTCAAGGCCGAGCGTGAGCGTGGTATCACCATCGACATT  
GCCCTGTGGAAGTTCGAGACTCCCAAGTACTATGTCACCGTCATTGACGCCCCCGGCCACCGTGATT

TCATCAAGAACATGATCACTGGTACTTCCCAGGCCGATTGCGCCATTCTCATCATTGCCGCCGGTACT  
GGTGAGTTCGAGGCTGGTATCTCCAAGGATGGCCAGACCCGTGAGCACGCTCTGCTCGCCTACACC  
CTGGGTGTCAAGCAGCTCATCGTCGCCATCAACAAGATGGACACTCCTTGAGGCCATCGACTCCATC  
GAGCCCCCAAGCGTCCCACGGACAAGCCCCTCCGTCTTCCCCTCCAGGATGTGTACAAGATCGGTG  
GTATCGGAACGGTTCGCGTCCGCGTATCGAGACTGGTGTCCCTCAAGCCCGGTATGGTCGTTACCTT  
CGCTCCTTCCAACGTCACCACTGAAGTCAAGTCCGTCGAGATGCACCACGAGCAGCTCGTTGAGGGT  
GTTCCCGGTGACAACGTTGGTTTCAACGTGAAGAACGTTTCCGTCAAGGAAATCCGCCGTGGTAACG  
TTGCCGGTGACTCCAAGAACGACCCCCCATGGGTGCCGCTTCTTTCACCGCCCAGGTCATCGTCAT  
GAACCACCCCGGTGAGGTCGGTGCCGGCTACGCCCCCGTCTTGACTGCCACACTGCCACATTGCC  
TGCAAGTTCGCCGAGCTCCAGGAGAAGATCGACCGCCGTACCGGTAAGGCTACCGAGACTGCCCC  
AAGTTCATCAAGTCCGGTGACTCTGCCATCGTCAAGATGATTCCCTCCAAGCCCATGTGCGTTGAGG  
CTTTCACCGACTACCCTCCCCTGGGTGTTTTGCGCGTCCGTGACATGCGACAGACCGTCGCTGTGGT  
GTCATCAAGGCTGTCGACAAGTCCGCTGCCACCGCTGGCAAGGTCACCAAGTCCGCTGCCAAGGCC  
ACCAAGAAATAA

---
